# Supplementary material for: SNX10 regulates the proliferation, apoptosis and cell cycle of acute B lymphoblastic leukemia cells via the PI3K/Akt signaling pathway
Source: Oncol Rep. 2025 May 8;54(1):78. doi: 10.3892/or.2025.8911 (PMC12093086; doi:10.3892/or.2025.8911)
Supplement: Supporting Data [file Supplementary_Data3.xlsx]

## Sheet: Supplementary Data S1
Table SIII. Summary of differential genes logfc
ENSEMBL	ENTREZID	SYMBOL	avg_logfc	Sig	ALLIUM.B.other	BCR..ABL1	BCR..ABL1.like	DUX4.r	ETV6..RUNX1	ETV6..RUNX1.like	HeH	KMT2A.r	PAX5alt	TCF3..PBX1	ZNF384.r	iAMP21
ENSG00000001617	6405	SEMA3F	5.79423	Up	6.91894	2.72831	4.59249	4.86983	7.50621	6.99724	6.93603	4.71724	5.08413	5.44202	6.54314	7.19515
ENSG00000004399	23129	PLXND1	4.10035	Up	4.71827	4.90064	5.10647	3.6289	3.72588	4.31047	4.31862	3.27521	4.54079	2.78157	2.90961	4.98784
ENSG00000004777	115703	ARHGAP33	5.54148	Up	6.31676	4.67794	6.1859	5.35937	5.81535	5.92396	3.87554	5.70741	4.94436	6.72737	5.38524	5.57855
ENSG00000004809	85413	SLC22A16	7.05358	Up	6.27254	7.4988	7.17417	6.9785	7.1396	7.23533	7.47389	7.11068	6.93324	6.75026	6.99316	7.08277
ENSG00000004939	6521	SLC4A1	8.14645	Up	8.48334	6.63328	8.41247	7.62807	9.59038	8.4056	8.23345	7.60336	7.46164	8.08488	8.67064	8.55029
ENSG00000005189	81691	REXO5	3.6326	Up	3.43484	3.48461	3.46563	3.23228	3.64003	3.46725	3.78481	3.91505	4.07781	3.38342	3.70194	4.00353
ENSG00000005381	4353	MPO	7.427	Up	7.23285	8.72823	7.62799	6.5023	6.92352	6.33043	7.81256	6.55636	9.39004	6.93796	9.1933	5.88849
ENSG00000005884	3675	ITGA3	-3.70866	Down	-3.43545	-3.14617	-4.02951	-3.409	-3.04302	-2.94676	-4.71095	-4.94726	-3.58064	-3.26895	-4.12851	-3.85773
ENSG00000006016	9244	CRLF1	-3.14718	Down	-3.61384	-3.32118	-3.41444	-2.83615	-3.1296	-3.79505	-2.33444	-3.14169	-2.88652	-4.15466	-2.36265	-2.77593
ENSG00000006459	80853	KDM7A	-2.31358	Down	-2.4566	-2.13413	-2.45976	-2.01938	-2.14509	-2.24669	-1.69274	-2.74516	-2.35612	-2.81651	-2.70417	-1.98665
ENSG00000006555	55001	TTC22	-4.30398	Down	-3.464	-4.74513	-3.73377	-4.71766	-4.21286	-3.5568	-4.85138	-5.18852	-4.14276	-3.68338	-4.67175	-4.67975
ENSG00000006704	9569	GTF2IRD1	5.2346	Up	5.48083	4.37528	4.83873	5.01483	5.7738	5.57274	4.82576	4.94518	5.26128	6.10418	5.29568	5.32696
ENSG00000006747	85477	SCIN	-4.02617	Down	-3.66528	-3.91109	-4.13789	-3.67881	-3.76578	-4.18111	-3.99297	-4.28725	-4.188	-4.1678	-4.21794	-4.12013
ENSG00000006756	414	ARSD	2.64556	Up	2.39711	3.07353	2.75034	2.61284	2.20803	2.74243	3.72835	2.59651	2.06134	2.24467	2.72396	2.60762
ENSG00000007062	8842	PROM1	5.91436	Up	5.02399	7.76059	4.98001	1.75092	6.20045	6.70766	8.78387	8.52636	3.65433	3.91335	6.86798	6.80279
ENSG00000007237	8522	GAS7	3.61375	Up	3.22168	4.47476	3.95473	3.21278	2.19195	3.48623	4.1591	4.26752	3.81143	3.18679	4.15234	3.24567
ENSG00000007384	64285	RHBDF1	2.9846	Up	3.60826	2.83821	3.01518	3.18714	1.80294	1.68156	2.12953	4.47866	2.98354	2.6523	4.64232	2.79556
ENSG00000007968	1870	E2F2	4.24801	Up	4.8992	3.19716	4.63065	4.18711	4.09536	4.4599	4.66248	2.42075	4.5464	6.35081	3.46376	4.06254
ENSG00000008226	9940	DLEC1	-2.52788	Down	-2.32363	-2.86889	-2.19535	-3.12736	-2.76807	-2.87211	-2.94164	-1.68895	-2.84597	-2.40305	-2.41588	-1.88368
ENSG00000008438	8993	PGLYRP1	2.59514	Up	2.68219	4.08774	2.99272	2.6192	2.29564	1.78892	2.01105	2.27008	2.06157	3.30545	3.22911	1.79807
ENSG00000008441	4784	NFIX	2.9338	Up	3.03619	2.9948	3.54748	3.12792	1.99605	1.52733	2.58339	1.85167	3.53519	3.76005	4.53582	2.70965
ENSG00000008516	64386	MMP25	3.68274	Up	5.28728	3.73582	4.45025	3.27784	3.2696	3.34707	3.69033	2.43771	2.88484	3.37042	4.33856	4.10321
ENSG00000009790	80342	TRAF3IP3	-3.15118	Down	-3.24625	-2.7124	-2.52639	-4.19588	-3.52433	-3.02794	-3.15799	-2.48291	-2.63285	-3.69664	-3.66939	-2.94117
ENSG00000010310	2696	GIPR	-2.572	Down	-1.98553	-2.70774	-2.37974	-2.5855	-2.92798	-2.94912	-3.24007	-2.43708	-2.17146	-2.23943	-2.84222	-2.39809
ENSG00000011426	54443	ANLN	3.91173	Up	3.64381	3.57554	3.79719	3.21373	4.611	3.57758	4.3756	3.62774	4.0917	4.86712	3.60212	3.95764
ENSG00000012048	672	BRCA1	2.22021	Up	1.64044	2.04881	2.15788	1.61674	2.73656	2.04664	2.93642	1.75461	2.28813	2.60414	1.94568	2.86644
ENSG00000012223	4057	LTF	6.16479	Up	5.16699	7.74589	6.47631	6.59628	5.97934	4.76554	5.98577	5.8925	5.29674	6.71405	7.30931	6.04873
ENSG00000013392	112611	RWDD2A	-2.61235	Down	-2.30094	-2.94061	-3.00324	-2.57445	-2.72621	-2.67733	-1.61748	-2.07273	-2.48889	-3.09126	-3.70345	-2.15161
ENSG00000015413	1800	DPEP1	8.30767	Up	7.9679	8.4157	10.494	8.16868	8.89695	11.2559	7.99465	3.00609	6.51701	9.23967	8.26701	9.46838
ENSG00000016391	55349	CHDH	-2.33996	Down	-2.28643	-2.18699	-2.40851	-2.19374	-2.25599	-1.99698	-2.74602	-2.29804	-2.43111	-2.27128	-2.1186	-2.88587
ENSG00000019991	3082	HGF	4.53211	Up	4.43465	5.59905	4.94622	5.38204	2.76752	2.52011	5.85153	4.4284	4.34754	1.84948	7.03744	5.22136
ENSG00000021300	58473	PLEKHB1	-3.91288	Down	-3.47116	-4.29914	-4.61881	-4.01626	-3.28762	-3.43605	-4.6494	-4.31732	-3.58916	-3.57542	-3.9522	-3.74199
ENSG00000021645	9369	NRXN3	7.13072	Up	7.99586	9.08658	10.9741	5.30612	9.73051	8.68565	8.06777	4.0345	5.06652	4.31231	4.25283	8.05587
ENSG00000022267	2273	FHL1	3.34003	Up	3.86047	3.64243	4.02361	1.83788	3.22912	3.89349	3.86971	3.58845	3.65011	2.31344	2.75649	3.41521
ENSG00000023445	330	BIRC3	-5.22473	Down	-4.76122	-4.76571	-5.44946	-5.93589	-5.23433	-4.29156	-4.89792	-5.18367	-5.76397	-6.3926	-4.96646	-5.05395
ENSG00000026103	355	FAS	-2.85736	Down	-2.36469	-2.5094	-2.74162	-3.43915	-2.7309	-3.22227	-3.00084	-2.23515	-2.80704	-3.61044	-2.92385	-2.70302
ENSG00000026751	57823	SLAMF7	-3.54634	Down	-3.31243	-2.46881	-3.72005	-4.75131	-3.57688	-3.12954	-3.5678	-3.60346	-3.04974	-3.41304	-3.76391	-4.19912
ENSG00000033327	9846	GAB2	3.54879	Up	3.79616	3.51278	3.49056	4.14714	3.20596	3.52275	3.40834	3.56721	3.80461	3.40696	3.36763	3.35531
ENSG00000034152	5606	MAP2K3	2.39632	Up	3.067	1.80373	2.616	2.84203	1.97001	2.03151	1.98235	2.2333	2.49486	3.15168	2.71705	1.84637
ENSG00000035115	26751	SH3YL1	-1.97526	Down	-2.0027	-1.92324	-1.92939	-1.73822	-2.26462	-2.54401	-1.79252	-1.77599	-1.83228	-1.89365	-2.1794	-1.82709
ENSG00000035499	55789	DEPDC1B	2.42274	Up	2.20241	2.31918	2.48489	2.04775	2.83397	2.51304	2.98941	2.03321	2.6647	2.7932	1.9217	2.26945
ENSG00000042062	140876	RIPOR3	3.55637	Up	3.65145	2.55963	4.38363	3.14486	4.14677	3.45074	3.0962	2.96908	3.15991	3.40225	5.15029	3.56163
ENSG00000044459	54875	CNTLN	3.59243	Up	2.73288	3.94173	3.54291	3.08292	3.53176	3.2745	4.68349	3.51664	3.24518	3.8289	3.56261	4.16562
ENSG00000050030	340533	NEXMIF	-5.35726	Down	-4.51893	-4.6274	-5.33065	-5.71897	-5.6929	-5.2578	-5.31324	-6.44491	-4.8505	-5.89415	-6.17947	-4.45827
ENSG00000050165	27122	DKK3	-2.76319	Down	-2.77708	-2.78752	-2.98735	-2.78271	-2.39363	-2.58702	-2.09317	-3.11149	-2.67614	-3.75935	-2.83643	-2.36634
ENSG00000050344	9603	NFE2L3	-3.08181	Down	-3.22658	-2.23999	-3.37896	-2.91506	-3.20475	-3.62382	-3.17395	-3.07354	-2.7977	-2.4869	-3.12913	-3.73134
ENSG00000051180	5888	RAD51	2.51822	Up	2.77636	2.04816	2.3316	1.65942	3.33199	2.56337	2.43876	2.36988	3.087	3.36217	1.62808	2.62186
ENSG00000051341	10721	POLQ	3.13516	Up	2.93713	3.01514	3.21004	2.79954	3.65423	2.97419	3.49675	2.5484	3.20838	3.7666	2.78552	3.22602
ENSG00000053747	3909	LAMA3	4.98988	Up	4.25334	6.53228	5.03198	2.73093	5.46356	3.92815	6.43483	4.61223	6.47379	3.66769	4.75193	5.99789
ENSG00000056736	55540	IL17RB	-2.07395	Down	-1.7635	-1.98375	-2.06159	-2.23572	-2.18225	-2.05327	-1.88545	-2.21399	-1.97989	-2.26755	-2.12705	-2.13336
ENSG00000060138	8531	YBX3	3.10946	Up	2.79928	3.68034	3.72012	3.55594	3.14019	3.63908	3.07276	2.9608	2.78694	1.87225	3.14577	2.94004
ENSG00000060558	2769	GNA15	6.4185	Up	6.42136	6.62093	7.02795	7.70781	5.51881	6.74995	6.37191	6.32033	5.60952	5.37901	7.72775	5.56663
ENSG00000061918	2983	GUCY1B1	3.88059	Up	3.39103	3.92496	4.15849	3.20469	4.81372	4.27961	4.21939	4.26056	3.30947	2.36162	4.76983	3.87367
ENSG00000064655	2139	EYA2	-3.15822	Down	-2.41683	-3.08509	-3.36302	-3.49237	-2.90304	-2.97945	-3.32237	-3.61996	-3.10327	-3.29742	-3.30329	-3.01249
ENSG00000065328	55388	MCM10	3.62578	Up	3.55682	3.15036	3.32045	3.28158	4.41793	3.74082	4.3195	2.75075	3.82848	4.39171	3.01939	3.73159
ENSG00000065413	91526	ANKRD44	-2.662	Down	-2.45148	-1.89671	-1.87547	-3.73444	-2.84065	-2.47557	-2.70941	-2.37337	-2.38058	-4.05409	-2.88739	-2.26487
ENSG00000065534	4638	MYLK	6.57009	Up	5.98613	7.0936	6.53277	5.93647	7.50497	7.13096	6.3005	3.93626	6.27951	8.00175	6.75525	7.38296
ENSG00000066056	7075	TIE1	6.17447	Up	7.19738	6.73571	5.90584	5.06199	6.93253	6.64705	7.70963	5.62804	5.4843	3.13349	5.60362	8.05407
ENSG00000066279	259266	ASPM	3.28681	Up	2.95513	2.95605	3.07059	2.54354	4.11302	2.88384	3.67624	2.73563	3.38541	4.89846	2.65758	3.56621
ENSG00000066336	6688	SPI1	2.48846	Up	2.62931	2.92351	2.81045	1.89389	2.16135	2.35965	1.99748	2.88541	2.44223	3.19004	2.69791	1.87024
ENSG00000066735	26153	KIF26A	5.75516	Up	5.52923	4.54363	6.26141	6.73192	6.64837	8.08992	5.4935	5.02882	3.57524	6.02166	4.98372	6.15455
ENSG00000068489	55771	PRR11	2.85148	Up	2.93454	2.61357	2.93493	2.48213	3.12842	2.67888	3.25125	2.32232	3.21477	3.36201	2.74192	2.55297
ENSG00000069667	6095	RORA	-4.00005	Down	-3.33586	-3.70587	-4.54425	-3.89035	-3.7566	-3.44572	-3.8603	-4.53668	-4.28887	-4.15482	-4.22964	-4.25168
ENSG00000069869	4734	NEDD4	2.71089	Up	2.05543	3.22056	2.37495	2.75834	2.99055	2.78842	3.39684	2.01887	2.50304	2.49308	2.76447	3.16609
ENSG00000070182	6710	SPTB	5.85017	Up	6.0516	4.46895	6.36381	5.27508	7.09069	5.50483	6.07683	5.36258	5.2648	5.87494	6.44641	6.42152
ENSG00000070614	3340	NDST1	3.07435	Up	2.82087	3.40082	3.07224	2.60733	3.20937	3.63152	3.39945	2.79621	2.88758	2.12735	3.51691	3.42249
ENSG00000070669	440	ASNS	-2.72961	Down	-1.59994	-3.42402	-2.2762	-2.26667	-2.81641	-4.02481	-3.67168	-1.74876	-1.63513	-3.06672	-3.22961	-2.99539
ENSG00000071051	8440	NCK2	-2.53936	Down	-2.3932	-2.36895	-2.78221	-2.38994	-2.54308	-2.35752	-2.46147	-2.31923	-2.80604	-2.4465	-2.88503	-2.71913
ENSG00000072133	27330	RPS6KA6	-3.81863	Down	-3.67023	-3.58889	-4.31073	-3.77498	-3.57357	-3.57329	-3.6712	-3.89348	-4.03602	-3.95048	-3.84465	-3.93604
ENSG00000072682	8974	P4HA2	5.50794	Up	5.59117	5.17045	6.14603	3.35539	5.63351	5.75939	6.62215	4.08699	6.16067	7.69229	3.45764	6.41957
ENSG00000073060	949	SCARB1	3.85341	Up	3.83247	3.62253	4.44485	3.98427	4.82543	4.86792	2.88355	3.23677	3.40344	3.50272	3.61222	4.0248
ENSG00000073111	4171	MCM2	2.50551	Up	2.71207	2.10477	2.81754	2.11138	2.75181	2.88514	2.18533	1.71037	2.48732	3.34262	2.49162	2.46609
ENSG00000073150	56666	PANX2	4.75549	Up	4.80375	3.22504	4.45864	6.53975	3.25674	4.34039	4.69668	6.93602	3.65834	3.67233	6.8372	4.64095
ENSG00000073670	4185	ADAM11	2.30612	Up	3.18728	1.86433	2.55693	2.75865	1.76081	2.04907	2.09651	2.27879	2.34751	2.74662	1.77861	2.24832
ENSG00000073712	10979	FERMT2	4.02028	Up	3.70379	4.2965	4.41997	3.78001	4.91784	4.73664	5.96662	3.3647	2.77342	2.05495	3.70899	4.51993
ENSG00000073792	10644	IGF2BP2	4.54166	Up	4.20355	5.17841	5.0626	2.33458	4.77112	3.5966	4.81046	8.26723	3.59859	3.23937	4.43359	5.00379
ENSG00000073849	6480	ST6GAL1	-2.36136	Down	-2.88238	-2.25871	-2.93978	-2.07494	-2.20453	-1.77972	-2.51662	-2.31822	-2.56304	-1.92532	-1.9282	-2.9449
ENSG00000074657	55205	ZNF532	-4.40535	Down	-3.82404	-4.92163	-4.27302	-5.19522	-3.51179	-3.83792	-5.25864	-3.57902	-4.72553	-3.75326	-5.34707	-4.63712
ENSG00000074660	8578	SCARF1	6.51414	Up	6.77972	6.86232	7.26099	6.21953	6.24571	6.72349	6.79544	4.52537	6.06829	6.71855	7.34332	6.62698
ENSG00000075218	51512	GTSE1	4.21152	Up	4.49552	3.72006	4.32717	3.64994	4.65095	4.07113	4.14804	3.92588	4.45979	5.4982	3.33675	4.25478
ENSG00000075618	6624	FSCN1	4.79754	Up	3.88107	5.61071	5.00846	3.92208	5.58437	5.12103	4.88979	4.22847	4.93357	3.56601	7.25923	3.5657
ENSG00000075702	284403	WDR62	3.94871	Up	4.64452	2.9654	4.2729	3.58359	4.57887	3.53551	3.01755	4.06062	4.1193	5.4104	3.26745	3.92844
ENSG00000076067	5939	RBMS2	2.85165	Up	2.31602	2.90061	2.50159	3.42267	2.19107	2.34623	2.96354	2.96734	3.0125	3.0862	3.39909	3.11288
ENSG00000076258	2329	FMO4	-3.0168	Down	-3.21538	-2.55867	-2.97149	-2.93088	-2.02387	-2.25358	-4.45655	-3.08448	-2.51031	-4.36999	-3.20678	-2.61963
ENSG00000076382	10615	SPAG5	2.54285	Up	2.48495	2.08192	2.41541	2.25725	3.08168	1.97073	2.87183	2.42907	2.7199	2.96674	2.48557	2.7492
ENSG00000076864	5909	RAP1GAP	3.56878	Up	3.73814	2.36148	3.30295	2.9519	5.60892	4.42763	3.46069	3.05223	3.09627	3.282	4.13127	3.41194
ENSG00000077238	3566	IL4R	-2.71267	Down	-1.6687	-2.48208	-2.67522	-1.58969	-3.63686	-2.90849	-2.82127	-3.06946	-3.38012	-2.83017	-2.76363	-2.72632
ENSG00000077264	5063	PAK3	-3.42544	Down	-3.21843	-3.44359	-3.42343	-3.59641	-2.74026	-3.28689	-3.65204	-3.56889	-3.41378	-3.70148	-3.69086	-3.36928
ENSG00000078589	27334	P2RY10	-4.35998	Down	-2.65668	-5.02419	-4.07518	-4.98294	-4.38176	-3.52442	-3.5042	-4.28545	-4.07911	-5.59475	-6.03798	-4.17312
ENSG00000079215	6507	SLC1A3	3.49462	Up	2.39089	4.91397	3.77662	4.01853	2.49323	1.70713	4.27516	4.59727	3.70794	2.07478	5.17873	2.80125
ENSG00000079263	11262	SP140	-4.48736	Down	-3.87868	-4.22403	-4.64271	-6.55888	-4.54467	-4.50489	-3.72708	-4.71015	-2.66456	-5.89768	-5.98856	-2.50648
ENSG00000079308	7145	TNS1	7.51074	Up	7.16405	6.81987	7.95148	6.14289	9.88568	9.52014	6.88317	5.8237	7.52711	7.94912	6.67825	7.78341
ENSG00000079337	10411	RAPGEF3	4.54183	Up	4.51912	5.87952	6.16158	3.91358	4.05753	4.78248	4.12949	3.03398	4.76671	4.15311	4.53073	4.57414
ENSG00000079691	55604	CARMIL1	-3.40895	Down	-3.40195	-2.83203	-4.2438	-4.25085	-2.42785	-2.74543	-4.12209	-3.93941	-2.47899	-3.55838	-3.99016	-2.91648
ENSG00000080561	11043	MID2	-4.85716	Down	-3.98993	-5.31453	-4.70971	-5.07668	-4.36472	-4.5198	-3.05828	-6.37137	-5.557	-5.53166	-5.26649	-4.52582
ENSG00000081087	28962	OSTM1	-2.04636	Down	-2.25974	-1.90265	-2.04508	-2.28659	-1.96664	-1.94288	-1.6374	-2.13543	-1.83284	-2.31445	-1.94758	-2.28506
ENSG00000081913	23239	PHLPP1	3.01835	Up	3.24986	2.61046	2.86291	2.51161	3.08305	3.11198	3.20228	3.02485	3.16908	3.16451	3.35692	2.87264
ENSG00000082556	4986	OPRK1	2.73514	Up	2.30718	2.80841	2.87328	3.79267	3.5033	2.39931	2.16781	3.65618	1.67566	2.70577	2.22705	2.70509
ENSG00000084710	22979	EFR3B	3.26097	Up	2.08772	2.81543	3.64677	3.09511	2.85876	2.5296	1.60221	3.66809	2.79196	4.55965	7.21436	2.262
ENSG00000084731	3797	KIF3C	2.31128	Up	1.86658	2.59741	2.20331	1.88893	2.9278	3.20428	2.38091	1.98674	2.24806	2.26958	1.97268	2.18911
ENSG00000085563	5243	ABCB1	-4.13187	Down	-3.55018	-3.00843	-4.57909	-5.19233	-3.78397	-3.9863	-4.62414	-3.41057	-4.27577	-4.60053	-4.8708	-3.70036
ENSG00000085840	4998	ORC1	2.83304	Up	3.31017	2.15384	2.83295	2.53869	3.21347	2.48803	2.47631	2.54895	3.30969	3.43269	2.79548	2.89625
ENSG00000085871	4258	MGST2	3.20016	Up	3.27336	3.75766	3.25237	3.04072	2.5438	2.38628	3.03011	4.01192	3.56219	3.22472	3.49669	2.82214
ENSG00000085999	8438	RAD54L	4.417	Up	4.48953	4.40149	4.92397	3.60435	4.99569	3.87069	3.9785	4.45122	4.8295	5.29442	3.88749	4.27721
ENSG00000086289	54749	EPDR1	2.87867	Up	1.84939	3.4245	2.46866	2.11721	3.36127	3.25886	3.88318	2.91484	2.80691	2.4489	3.22035	2.78993
ENSG00000086300	29887	SNX10	-4.00617	Down	-3.59246	-3.01343	-4.5024	-5.39324	-3.98719	-3.48515	-4.70014	-3.01301	-2.81255	-3.67979	-5.04538	-4.84927
ENSG00000086548	4680	CEACAM6	4.80478	Up	5.20013	7.47627	5.54781	3.64847	3.47709	2.62363	7.69498	2.48752	6.38893	2.70979	4.0156	6.38718
ENSG00000086730	7462	LAT2	3.79238	Up	3.54797	4.04588	4.46151	2.71856	2.44967	4.12598	4.04671	3.59274	4.28272	4.50456	3.73871	3.99352
ENSG00000087258	2775	GNAO1	-2.50156	Down	-2.12608	-2.97718	-2.15102	-2.57728	-2.34053	-2.46327	-3.21352	-2.89113	-2.72107	-1.88862	-2.7154	-1.95357
ENSG00000087303	22795	NID2	4.73339	Up	4.47657	4.26926	4.93628	3.12641	4.87849	6.68236	1.93437	1.77856	6.45326	9.59968	4.228	4.43747
ENSG00000088305	1789	DNMT3B	3.89558	Up	3.36731	2.80971	3.99569	4.14979	3.56203	2.89013	3.33481	4.54048	3.6162	5.15963	5.10182	4.2194
ENSG00000088325	22974	TPX2	2.66457	Up	2.22997	2.41371	2.65998	2.27378	3.30937	2.19804	3.01503	2.24744	3.0675	3.65114	2.30107	2.60785
ENSG00000088826	54498	SMOX	3.50009	Up	3.94206	2.75682	2.79291	4.77143	2.65971	2.63913	3.78021	3.81458	3.23367	2.73983	5.44907	3.42163
ENSG00000088882	56265	CPXM1	7.23909	Up	7.82426	6.64604	6.22904	7.79656	7.68224	7.66228	5.85249	6.94637	7.61292	8.20581	6.98504	7.42606
ENSG00000090776	1947	EFNB1	4.05566	Up	4.19626	3.79216	4.25026	3.56821	5.05723	5.56125	5.61179	2.47455	3.02661	1.66259	4.86636	4.60064
ENSG00000090889	24137	KIF4A	3.25628	Up	2.71886	2.64285	3.1344	2.55777	4.19545	2.94474	4.30684	2.95972	3.42319	3.89033	2.57719	3.72404
ENSG00000091181	3568	IL5RA	-3.91713	Down	-4.7733	-3.01149	-4.29053	-3.78254	-4.02095	-3.95785	-4.58282	-2.39323	-4.1518	-4.22501	-3.3854	-4.43059
ENSG00000091490	23231	SEL1L3	-3.50385	Down	-3.12866	-3.39295	-4.54499	-6.05853	-3.56237	-3.33842	-3.28869	-2.54303	-3.7608	-2.67103	-2.36434	-3.39239
ENSG00000091651	23594	ORC6	2.14984	Up	2.33261	1.65495	1.82467	1.62131	2.60622	2.01116	2.30715	2.08875	2.27927	2.09532	2.32069	2.65603
ENSG00000092445	7301	TYRO3	3.59565	Up	3.0547	2.75751	3.49108	1.96052	5.10663	5.15243	2.89757	4.14296	3.11397	3.37208	3.99781	4.10057
ENSG00000092853	63967	CLSPN	2.98996	Up	2.29952	2.71648	2.66292	2.30258	3.68644	2.51143	3.45234	3.02393	3.48257	3.82865	2.55054	3.36209
ENSG00000093009	8318	CDC45	3.90419	Up	3.94955	3.63464	3.9459	3.34854	4.51658	3.69995	4.01177	3.20367	4.16106	4.60472	3.41732	4.35657
ENSG00000094804	990	CDC6	2.67581	Up	2.38934	2.66163	2.45753	2.49023	3.07673	2.30375	3.10094	2.01656	3.13786	3.2432	2.46901	2.76298
ENSG00000095932	284422	SMIM24	6.46464	Up	5.88299	6.30229	5.94553	7.25654	5.78831	4.93578	7.93728	7.60779	6.04046	4.79476	7.46039	7.62359
ENSG00000097096	84144	SYDE2	-4.21004	Down	-3.47272	-4.7658	-4.38378	-4.27027	-3.53576	-4.07277	-4.44363	-3.55149	-4.59364	-4.92618	-4.12563	-4.37877
ENSG00000099204	3983	ABLIM1	-3.01266	Down	-1.89211	-2.02768	-2.94254	-4.46748	-2.98682	-2.40584	-2.66717	-4.02493	-2.1538	-3.23471	-4.48852	-2.86029
ENSG00000099250	8829	NRP1	5.53332	Up	5.47404	7.56362	6.44094	3.01619	7.03912	7.5216	5.72017	3.4349	6.46479	3.05249	4.09333	6.57863
ENSG00000099864	5064	PALM	6.84844	Up	7.36856	8.318	8.4191	7.97605	4.16965	6.51439	6.65808	5.65219	7.80889	5.23029	8.2623	5.8038
ENSG00000099889	421	ARVCF	3.63694	Up	4.12087	3.35602	4.1308	4.6236	3.66476	3.81145	3.35084	2.05484	3.22212	3.59609	4.00496	3.70698
ENSG00000100162	79019	CENPM	3.45687	Up	4.06446	2.96805	4.10464	2.92431	3.55762	3.63553	2.88912	2.57462	3.87772	4.76802	3.04974	3.06866
ENSG00000100307	23492	CBX7	-3.11613	Down	-2.82346	-2.6213	-2.95531	-3.47831	-3.11327	-2.33268	-3.69157	-3.47322	-3.2034	-2.95525	-3.33886	-3.4069
ENSG00000100321	9145	SYNGR1	5.92784	Up	6.58067	6.0776	7.06523	5.34527	5.86633	6.43121	5.16899	5.90308	6.26732	4.9427	5.50008	5.9856
ENSG00000100351	9402	GRAP2	-3.97598	Down	-3.33716	-4.24535	-3.93272	-5.00053	-3.66092	-3.46174	-4.4798	-3.78915	-3.0655	-4.57848	-3.98026	-4.18014
ENSG00000100365	4689	NCF4	2.35705	Up	2.16125	2.0094	2.99405	2.6853	2.53124	2.39623	1.59065	2.35931	2.43324	2.92876	1.85453	2.34065
ENSG00000100427	23209	MLC1	4.93651	Up	5.78344	5.00124	5.07987	4.37713	3.64826	3.95576	4.48149	7.39095	5.32539	3.16549	5.89341	5.13564
ENSG00000100448	1511	CTSG	5.50221	Up	4.237	6.87178	5.50489	4.95392	4.97607	4.21895	5.62928	5.89945	5.33231	7.62564	6.19642	4.5808
ENSG00000100479	5427	POLE2	2.24965	Up	2.17919	1.76469	2.0698	1.99207	2.57664	2.28157	2.88912	1.77195	2.6035	2.34631	2.16059	2.36042
ENSG00000100985	4318	MMP9	4.32543	Up	5.48189	4.94383	4.7953	4.54838	3.86525	3.71714	3.57853	4.01522	3.37204	4.40035	5.12695	4.06024
ENSG00000101057	4605	MYBL2	4.08036	Up	4.82584	2.9505	4.03578	3.91869	4.79348	4.36763	3.6911	2.95808	4.33511	5.69781	3.12359	4.26668
ENSG00000101109	6789	STK4	-2.37177	Down	-2.51163	-2.22011	-2.51112	-2.49254	-2.22261	-2.09698	-2.34316	-2.38711	-2.48535	-2.78062	-2.14885	-2.26116
ENSG00000101342	140711	TLDC2	-2.30347	Down	-2.16252	-2.74307	-2.38855	-2.80835	-2.37475	-2.21573	-2.52653	-2.23657	-2.2016	-1.52232	-1.74577	-2.7159
ENSG00000101384	182	JAG1	3.61432	Up	3.7453	3.48502	2.73943	1.87588	5.35498	6.00538	2.85968	2.46864	1.92034	6.20529	1.83641	4.8755
ENSG00000101412	1869	E2F1	5.42171	Up	6.53881	4.72321	5.88649	5.48374	5.63898	5.93563	4.38893	4.11417	5.29739	7.32033	4.91899	4.81383
ENSG00000101425	671	BPI	3.99067	Up	3.39578	5.5747	4.1049	3.83627	4.05496	2.43198	3.88055	4.3896	3.03228	4.11903	5.13681	3.93117
ENSG00000101638	29906	ST8SIA5	4.46234	Up	5.20622	2.92981	2.91648	2.73194	3.79038	4.08702	5.74346	5.07646	5.27195	4.53697	8.2067	3.05068
ENSG00000101842	340547	VSIG1	-5.16463	Down	-3.89499	-5.42734	-5.17137	-6.01293	-4.72385	-4.21256	-5.52101	-5.24023	-5.17108	-5.63277	-5.44055	-5.52685
ENSG00000102055	80316	PPP1R2C	-3.23059	Down	-2.88068	-3.43749	-3.11745	-3.29591	-3.33419	-2.9076	-3.36897	-3.53209	-3.19537	-3.19174	-3.19559	-3.30996
ENSG00000102098	10389	SCML2	4.23004	Up	4.27699	4.19843	3.7527	3.73747	5.08933	4.9629	5.65142	3.43767	2.88308	3.92407	3.81518	5.03127
ENSG00000102145	2623	GATA1	3.65522	Up	4.12731	2.86169	4.2456	3.24982	4.40075	3.6371	3.17929	3.36917	3.51716	3.76513	3.86398	3.6456
ENSG00000102302	2245	FGD1	4.07583	Up	4.04399	3.6241	4.26311	3.03993	6.31775	5.95421	5.34238	2.37739	2.20931	4.596	2.18353	4.95832
ENSG00000102384	2491	CENPI	2.2059	Up	2.36713	1.80802	2.04109	1.8565	2.76132	2.06816	3.00424	1.89682	2.35217	2.18772	1.76668	2.36102
ENSG00000102837	10562	OLFM4	4.00348	Up	3.28268	5.277	4.14576	3.31081	4.64626	2.46039	4.91525	3.34718	3.27898	4.20404	4.64429	4.52911
ENSG00000102934	51090	PLLP	-3.13905	Down	-3.21158	-3.22445	-3.29265	-3.6735	-2.51438	-2.88192	-1.94048	-3.35943	-3.33429	-5.15274	-2.83031	-2.25283
ENSG00000102935	23090	ZNF423	8.81579	Up	8.24347	8.62749	9.35675	8.03214	9.99918	10.1391	8.25789	6.70301	8.50018	9.66327	9.05907	9.20799
ENSG00000103047	79613	TANGO6	-1.84102	Down	-1.84083	-2.02645	-1.71275	-2.07925	-1.56985	-1.57107	-1.73259	-2.00059	-1.57192	-1.77863	-2.69619	-1.51208
ENSG00000103056	55512	SMPD3	-3.56144	Down	-3.3764	-3.40151	-3.55214	-4.72811	-4.37701	-3.48799	-3.72845	-2.80343	-4.25545	-2.63231	-2.92234	-3.47219
ENSG00000103066	23659	PLA2G15	2.56878	Up	2.69921	1.74378	3.06627	2.56842	2.78165	3.83561	1.74814	2.23819	2.4523	3.76459	2.07251	1.85468
ENSG00000103187	23406	COTL1	-2.89639	Down	-2.80716	-1.93523	-3.54884	-3.29978	-3.58351	-2.73024	-3.10413	-2.07272	-2.78068	-2.30299	-2.3514	-4.24001
ENSG00000103257	8140	SLC7A5	3.47277	Up	4.80042	2.19867	3.98286	3.4936	2.73504	3.37854	2.52032	3.35733	3.71604	3.18867	4.86674	3.43496
ENSG00000103415	3163	HMOX2	-2.23782	Down	-2.58022	-1.83353	-2.44064	-2.34649	-2.45315	-2.28279	-2.17711	-1.93547	-1.98158	-2.15094	-2.16691	-2.50498
ENSG00000103479	5934	RBL2	-1.99214	Down	-2.188	-1.84441	-1.89447	-2.17919	-1.90707	-1.86291	-1.51902	-2.09166	-2.02219	-2.38944	-2.10639	-1.90095
ENSG00000103485	23475	QPRT	3.38469	Up	3.14349	2.92644	3.96172	3.62214	2.17914	2.90379	1.86205	4.69294	4.43554	4.79422	2.93852	3.15625
ENSG00000104427	51101	ZC2HC1A	-5.11316	Down	-4.71574	-4.8837	-5.50146	-6.08327	-4.85638	-4.53082	-5.57406	-4.59029	-4.18	-5.14767	-5.8153	-5.47925
ENSG00000104432	3574	IL7	-4.68713	Down	-4.11597	-4.74681	-4.75307	-5.46094	-4.38822	-3.89983	-4.5498	-3.90992	-4.49535	-5.26612	-5.46978	-5.1897
ENSG00000104447	7227	TRPS1	-3.88093	Down	-3.18	-4.34448	-4.23801	-4.5615	-3.41505	-3.87298	-4.37644	-2.91611	-3.02298	-3.88599	-4.66807	-4.08952
ENSG00000104738	4173	MCM4	2.53414	Up	2.25984	2.48468	2.4009	2.30961	2.7473	2.07758	2.85598	2.1473	2.96135	3.18814	2.34693	2.63012
ENSG00000104885	84444	DOT1L	2.36297	Up	2.60473	2.10375	2.69337	2.65629	1.97564	1.88932	1.65497	2.81862	2.29669	3.05516	2.44707	2.16006
ENSG00000104899	268	AMH	3.12035	Up	4.39299	2.20312	3.42261	2.79345	2.32769	2.90691	2.01341	3.02282	3.07176	4.20959	2.67249	4.40733
ENSG00000104998	9466	IL27RA	-2.40786	Down	-1.70414	-1.88089	-1.88651	-3.29196	-2.57969	-1.76998	-2.41764	-2.72191	-2.75111	-2.82774	-2.76511	-2.29761
ENSG00000105281	6510	SLC1A5	2.40769	Up	2.46926	1.95713	2.54149	2.92483	2.24019	2.02321	2.3877	1.94725	2.25754	3.07348	3.10818	1.96206
ENSG00000105289	27134	TJP3	-4.01654	Down	-2.938	-4.49275	-3.94005	-4.30943	-3.58642	-3.45264	-4.68826	-4.70585	-4.03908	-4.12672	-4.16134	-3.75792
ENSG00000105371	3386	ICAM4	2.70236	Up	2.63536	3.23434	2.80118	2.52054	2.04112	2.6242	2.27781	2.63395	3.0091	1.60029	4.00742	3.04297
ENSG00000105472	6320	CLEC11A	6.59762	Up	6.04788	7.44242	7.26956	7.31197	5.15239	5.57168	5.48499	6.46047	7.15549	8.19587	7.70094	5.37775
ENSG00000105610	10661	KLF1	4.8475	Up	5.44116	3.55303	5.26499	4.57458	5.57526	4.74859	4.79097	4.40163	4.52514	4.9754	5.44337	4.87588
ENSG00000105711	6324	SCN1B	3.4746	Up	3.94612	4.15401	3.14822	3.17221	2.40975	2.4113	4.28602	3.70613	3.01188	2.23678	5.14039	4.07233
ENSG00000105737	2901	GRIK5	6.97832	Up	7.71783	6.41504	8.21675	5.59984	7.4082	7.35848	7.38889	4.16063	7.59368	6.78821	7.26242	7.82989
ENSG00000105810	1021	CDK6	2.79504	Up	2.00161	3.52246	2.94417	2.3491	3.03301	3.30725	3.31887	3.02031	3.04525	2.08123	2.11973	2.79748
ENSG00000105982	140545	RNF32	-2.93381	Down	-3.37442	-3.63974	-3.83188	-1.56438	-2.03162	-2.82683	-3.49301	-1.94238	-3.41633	-2.16103	-3.19846	-3.72564
ENSG00000106070	2887	GRB10	5.59549	Up	5.73773	6.17229	6.34832	5.20139	5.58296	5.11347	5.66467	4.37152	5.45522	5.49659	6.27785	5.72384
ENSG00000106125	84182	MINDY4	2.49684	Up	2.66116	2.12335	2.77994	2.49929	2.76725	2.09134	1.62776	3.21812	2.53273	3.45002	1.79263	2.41854
ENSG00000106211	3315	HSPB1	3.20888	Up	3.37716	3.30674	3.22219	3.32363	3.68684	3.15326	2.30551	2.95578	3.01443	4.00077	3.6666	2.49363
ENSG00000106366	5054	SERPINE1	6.988	Up	6.36308	7.37469	7.76639	6.77898	7.21341	7.01313	7.17407	6.84456	7.09503	6.23359	7.25602	6.74307
ENSG00000106665	7461	CLIP2	4.1646	Up	3.74446	3.87289	4.84848	3.60414	3.87013	4.83718	3.78511	4.02273	4.57992	3.61646	4.92076	4.27292
ENSG00000106688	6505	SLC1A1	-1.84297	Down	-1.93733	-1.78015	-1.75438	-1.86007	-1.67508	-1.73982	-1.94045	-1.83593	-1.97332	-2.02121	-1.87149	-1.72637
ENSG00000106733	54981	NMRK1	-1.87633	Down	-1.76066	-1.91606	-1.76184	-1.94094	-1.90741	-1.91615	-1.81493	-1.68416	-1.60248	-2.44983	-2.20832	-1.55317
ENSG00000106772	158471	PRUNE2	3.7147	Up	3.04774	5.55371	2.49944	5.7146	3.79309	3.6063	3.11134	2.58758	3.75124	3.82928	3.598	3.48411
ENSG00000106976	1759	DNM1	3.96559	Up	4.13265	3.42267	4.25326	3.46031	4.56412	4.33917	3.12576	4.16258	4.12415	2.9947	4.76164	4.24604
ENSG00000106991	2022	ENG	5.7506	Up	6.08598	6.48863	7.04234	4.84244	5.66756	6.03474	4.84668	5.39006	6.60391	5.28392	5.19695	5.52397
ENSG00000107014	6019	RLN2	-2.62054	Down	-2.51104	-2.49479	-2.44812	-2.88169	-2.61893	-2.43395	-2.86325	-2.93996	-2.84988	-1.72031	-2.59975	-3.08476
ENSG00000107201	23586	RIGI	-2.16048	Down	-3.20245	-1.84832	-2.38899	-1.87816	-1.83402	-2.46047	-1.53042	-1.81074	-2.51212	-2.39787	-2.13349	-1.92877
ENSG00000107338	6461	SHB	3.53169	Up	3.49584	3.99376	3.18746	5.66878	2.72477	2.82065	2.94403	3.0492	3.21424	3.14743	5.78246	2.3517
ENSG00000107447	1791	DNTT	8.56527	Up	7.92933	9.47363	9.30549	8.11228	9.0131	8.70748	9.75509	5.28148	9.75427	7.67925	8.43993	9.33189
ENSG00000107679	59338	PLEKHA1	-3.25567	Down	-3.07876	-3.06899	-3.84433	-2.23694	-3.08281	-2.80559	-2.26934	-3.35308	-3.71042	-3.39645	-5.17793	-3.04334
ENSG00000107719	27143	PALD1	4.56677	Up	5.18474	5.49764	5.59055	4.01487	3.84002	3.79541	4.78111	2.49052	5.58395	5.0241	3.93777	5.06058
ENSG00000107742	9806	SPOCK2	-3.02807	Down	-1.75665	-2.58088	-2.20424	-4.30638	-3.62533	-2.0184	-3.27333	-3.67337	-3.02804	-4.70087	-2.20897	-2.96039
ENSG00000107779	657	BMPR1A	-5.32977	Down	-4.53004	-5.76802	-5.07051	-5.43979	-5.13825	-5.02561	-6.26285	-5.84634	-4.0854	-5.04286	-6.1515	-5.5961
ENSG00000107821	81621	KAZALD1	6.10174	Up	6.73216	7.01461	6.87225	5.58112	4.97297	6.4131	7.1286	3.54305	7.20038	4.5888	6.49995	6.67389
ENSG00000108175	57178	ZMIZ1	4.48607	Up	3.97649	4.40877	4.62835	4.67031	4.76184	4.89091	4.13167	4.623	4.29361	5.06386	3.96251	4.42159
ENSG00000108405	5023	P2RX1	5.77186	Up	6.27995	5.58827	6.76933	5.6377	5.02242	5.56324	4.58261	6.06315	5.7486	6.25857	6.32965	5.41879
ENSG00000108551	51655	RASD1	7.02417	Up	7.4463	6.63117	7.7009	9.64279	5.01982	6.8807	7.46947	5.82757	6.83927	6.02672	7.97926	6.82608
ENSG00000108825	100885850	PTGES3L-AARSD1	2.81326	Up	2.27086	2.38102	3.2288	1.98194	3.30127	2.84959	2.59104	4.15581	3.57664	1.82824	2.9487	2.64525
ENSG00000109458	2549	GAB1	4.84946	Up	4.74267	6.03605	5.91004	4.16994	5.82668	5.61144	5.2239	4.20798	5.05816	2.82093	3.30645	5.27923
ENSG00000109684	116449	CLNK	-3.64685	Down	-3.89176	-3.64012	-3.53817	-4.24391	-3.08893	-2.74202	-3.92834	-3.44748	-3.66819	-3.95089	-4.00746	-3.61493
ENSG00000109805	64151	NCAPG	2.59955	Up	2.27553	2.47007	2.36764	2.32178	3.10525	1.91258	3.4898	2.27079	2.98336	3.05897	2.32902	2.60973
ENSG00000109944	79864	JHY	-3.87158	Down	-4.06655	-2.31402	-4.1916	-4.27249	-3.37271	-4.07232	-3.90484	-5.00185	-2.74557	-5.01914	-4.50735	-2.99056
ENSG00000110002	4013	VWA5A	-3.29101	Down	-2.61784	-4.03188	-3.95177	-2.2642	-1.75819	-2.68217	-4.70446	-3.63938	-4.05567	-4.13553	-1.66288	-3.98818
ENSG00000110076	9379	NRXN2	5.49564	Up	5.2423	5.69137	6.18451	3.87297	3.68145	5.09763	5.21442	7.11917	5.46832	5.14214	5.70403	7.52935
ENSG00000110237	9828	ARHGEF17	6.62712	Up	7.40554	7.66169	9.15491	4.54996	7.39989	8.61005	5.34544	3.75361	8.14049	4.57759	6.22938	6.69685
ENSG00000110492	4192	MDK	5.78635	Up	6.38693	4.42858	4.37561	5.17911	7.63577	6.79062	5.81051	3.89832	6.07003	6.67087	5.99035	6.19946
ENSG00000110693	55553	SOX6	3.66151	Up	3.30108	2.13302	3.99856	3.25406	4.89239	2.99241	4.49947	3.47482	3.09798	3.15617	4.53622	4.60196
ENSG00000110799	7450	VWF	3.62346	Up	4.8673	3.43401	4.23791	4.17258	2.94803	2.09983	3.11054	3.70167	3.26682	3.24874	4.33447	4.05964
ENSG00000110934	51411	BIN2	-3.84068	Down	-3.83849	-3.0395	-3.9624	-4.78902	-4.04977	-3.95885	-3.61194	-3.31858	-3.91777	-4.65644	-3.28725	-3.6581
ENSG00000110944	51561	IL23A	-3.01473	Down	-2.37259	-3.02458	-2.80764	-3.3673	-2.61849	-2.23641	-1.61336	-3.74294	-2.92403	-5.25996	-4.01756	-2.19194
ENSG00000110987	605	BCL7A	3.03152	Up	3.19642	2.55981	3.172	3.96329	2.80314	3.60292	2.1576	3.32281	1.95711	3.78698	3.0189	2.83726
ENSG00000111110	57460	PPM1H	4.31113	Up	3.21043	3.32833	2.24593	7.21821	4.0657	3.33167	3.79489	8.03841	3.37801	3.14529	5.88241	4.0943
ENSG00000111206	2305	FOXM1	4.50121	Up	4.61247	4.24334	4.66226	4.1895	4.81537	4.47924	4.41585	3.98824	4.64503	5.88138	4.08732	3.99454
ENSG00000111269	1389	CREBL2	-3.10493	Down	-3.21073	-2.27823	-3.19342	-3.56914	-3.66908	-3.6246	-1.97736	-3.74849	-2.66325	-2.94589	-3.26199	-3.11702
ENSG00000111321	4055	LTBR	3.05248	Up	2.58828	4.10607	3.56751	2.96934	2.0701	2.2643	2.81011	3.9901	2.81259	2.046	4.42769	2.97767
ENSG00000111328	8099	CDK2AP1	2.55925	Up	2.03833	2.35263	2.16836	2.32583	2.8652	2.83933	2.85651	2.11211	2.64658	3.15425	2.82024	2.53164
ENSG00000111339	420	ART4	2.68013	Up	2.47664	1.55734	2.76116	2.20643	3.76002	2.58852	3.73505	1.65555	2.43462	2.01261	3.32272	3.65096
ENSG00000111405	8909	ENDOU	2.65565	Up	2.83425	3.78871	3.63283	2.07349	1.66225	2.49399	2.06784	2.61117	3.0246	3.01479	2.34484	2.319
ENSG00000111640	2597	GAPDH	2.30254	Up	2.592	2.22453	2.30817	2.09254	1.92177	2.26276	2.28784	1.7914	2.29055	3.08415	2.67877	2.09604
ENSG00000111665	83461	CDCA3	2.91914	Up	2.8031	2.86516	3.19065	2.69764	3.30651	2.82159	2.88163	2.32882	3.06941	4.05478	2.39744	2.61295
ENSG00000111676	1822	ATN1	2.37288	Up	1.91005	2.31784	2.53336	2.08315	2.72333	2.08851	2.0541	2.28529	1.6263	3.11958	2.38941	3.34369
ENSG00000111860	387119	CEP85L	-2.81254	Down	-3.10314	-1.77229	-2.38767	-3.27869	-2.53203	-2.37385	-3.3388	-2.18869	-2.40117	-2.72863	-4.98064	-2.66487
ENSG00000111962	10090	UST	-3.44101	Down	-3.55436	-2.80152	-2.79307	-3.42433	-4.30463	-4.0094	-3.73333	-2.48297	-4.70655	-2.473	-3.69061	-3.31836
ENSG00000112077	6005	RHAG	6.26729	Up	6.35618	4.72794	6.79999	5.96184	7.31325	6.17332	6.66564	5.5311	5.73404	6.1009	7.09408	6.74925
ENSG00000112208	9532	BAG2	-3.26779	Down	-3.18481	-3.56558	-3.86871	-2.77809	-3.93465	-3.79349	-3.09492	-2.47658	-2.76216	-2.53114	-3.12647	-4.09693
ENSG00000112290	8936	WASF1	4.38862	Up	4.03358	3.33011	3.1011	4.56981	3.85464	4.60767	4.82885	5.24211	5.17633	5.75574	4.08836	4.07516
ENSG00000112303	8875	VNN2	-3.02008	Down	-2.97665	-2.01089	-3.54216	-2.15493	-4.50353	-3.8432	-3.00345	-2.43621	-2.52668	-3.19226	-2.27707	-3.77392
ENSG00000112378	64065	PERP	-4.35561	Down	-3.03314	-4.43354	-5.04742	-4.34786	-4.22737	-3.60633	-4.68807	-3.99113	-4.47202	-5.05716	-4.63471	-4.72858
ENSG00000112486	1235	CCR6	-6.08891	Down	-5.15345	-5.15847	-2.88392	-7.71495	-7.11383	-4.87455	-5.02572	-8.38432	-6.47987	-7.32819	-6.37294	-6.57673
ENSG00000112530	135138	PACRG	-1.81304	Down	-2.01341	-1.63601	-1.7071	-1.597	-1.77134	-1.55324	-2.02301	-1.87134	-1.84916	-1.70437	-1.9705	-2.05999
ENSG00000112578	705	BYSL	2.32176	Up	3.29709	1.8397	2.16445	2.34687	2.01303	2.43485	2.14027	2.38807	2.53015	2.61398	1.96206	2.13063
ENSG00000112655	5754	PTK7	6.31837	Up	6.04429	5.5346	6.20304	7.02484	6.4426	6.43604	6.36539	5.66245	6.14677	7.08774	6.80774	6.06501
ENSG00000112742	7272	TTK	2.3051	Up	2.26453	1.79322	1.77636	1.92176	3.08371	2.40312	3.11429	1.72191	2.58601	2.86986	1.76779	2.35866
ENSG00000112759	2030	SLC29A1	2.69046	Up	2.55204	2.42702	2.99619	2.36246	2.34456	1.53408	2.90556	3.51056	3.3069	3.40541	2.86732	2.07342
ENSG00000112796	59084	ENPP5	-3.40532	Down	-3.80039	-3.0543	-3.09376	-4.08183	-2.9458	-2.67683	-3.55891	-3.79207	-3.5975	-3.21364	-3.7587	-3.29007
ENSG00000112812	10279	PRSS16	-1.84632	Down	-1.83432	-2.01301	-1.89404	-1.65412	-1.86137	-1.72973	-1.98798	-1.94978	-1.75123	-1.83792	-1.81895	-1.82337
ENSG00000112984	10112	KIF20A	3.40165	Up	2.99302	2.88299	3.39907	3.0757	4.43223	3.28658	3.50018	2.7801	3.63832	4.53295	2.89147	3.40714
ENSG00000113070	1839	HBEGF	4.90556	Up	4.72734	4.20902	4.85192	5.9715	3.93954	4.66543	6.05268	4.63648	4.88222	3.62455	6.65528	4.65069
ENSG00000113140	6678	SPARC	3.45858	Up	3.65376	4.81478	3.21228	2.28108	1.98245	1.87938	4.68628	2.94116	4.33815	3.14746	4.29795	4.26824
ENSG00000113231	8622	PDE8B	6.19703	Up	6.50771	6.56432	6.14043	7.79448	4.96988	4.71228	6.40855	5.43746	5.93843	6.5015	5.00856	8.38076
ENSG00000113389	4883	NPR3	3.87218	Up	3.29617	5.06572	3.40155	5.92865	3.72447	3.80905	3.20865	3.39159	2.84219	3.01901	6.86898	1.91012
ENSG00000113648	9555	MACROH2A1	2.32941	Up	2.15431	2.9771	2.74328	1.75325	1.9612	1.87349	2.25617	2.32321	2.85222	2.43668	2.13863	2.48334
ENSG00000113657	1809	DPYSL3	2.71862	Up	2.35714	2.07949	2.06778	2.83442	2.53213	2.72764	2.17079	7.00024	2.22937	3.0867	1.7998	1.73796
ENSG00000113749	3274	HRH2	3.47508	Up	3.18706	4.07667	4.14536	3.15783	3.19015	3.6118	3.69266	3.68315	3.26151	2.97262	3.57892	3.1432
ENSG00000113758	1627	DBN1	4.63684	Up	4.61546	3.37618	4.19454	4.95214	5.44019	5.20658	4.5962	3.24585	4.50708	5.7423	4.60577	5.15979
ENSG00000113966	84100	ARL6	-2.44379	Down	-2.51758	-1.62918	-2.67684	-2.14898	-3.15523	-2.7731	-2.69445	-2.17784	-1.87501	-1.74198	-3.69009	-2.2452
ENSG00000114270	1294	COL7A1	3.4728	Up	4.52725	2.41043	3.54321	4.05506	3.3233	3.0093	2.05957	3.68912	4.06726	4.66717	2.57548	3.74645
ENSG00000114405	57415	C3orf14	-3.36376	Down	-3.21206	-3.49874	-3.72839	-2.88264	-2.5284	-2.98711	-4.14267	-3.98304	-3.23453	-2.50492	-4.04321	-3.61939
ENSG00000114541	23150	FRMD4B	4.42832	Up	4.50666	4.99261	4.17879	4.24931	4.13755	4.34001	5.43179	3.54279	4.98704	3.82905	3.77076	5.17346
ENSG00000114670	79858	NEK11	-2.60585	Down	-3.13358	-1.78829	-2.10807	-2.20339	-2.11578	-2.57795	-3.64628	-2.52526	-2.97084	-3.32626	-2.19174	-2.68279
ENSG00000114853	92999	ZBTB47	2.62921	Up	2.60861	2.19314	2.37943	1.78202	2.22988	2.87391	2.59872	2.40746	1.96517	4.49102	2.36214	3.65906
ENSG00000114993	6242	RTKN	3.43628	Up	3.24774	3.21658	3.76509	3.51409	3.82207	3.69866	2.8642	3.11282	3.7312	2.78255	3.53159	3.94874
ENSG00000115266	10297	APC2	2.73302	Up	3.95209	1.8692	2.72517	3.5011	2.91516	3.23426	1.56577	2.40281	2.45579	3.33522	3.22558	1.61414
ENSG00000115295	79745	CLIP4	-3.33025	Down	-2.93847	-2.41867	-3.6468	-3.40536	-3.4683	-3.26678	-4.23976	-2.93027	-3.81107	-3.98289	-2.80652	-3.04817
ENSG00000115355	55704	CCDC88A	2.2839	Up	1.5223	2.80457	1.96412	1.91016	2.22273	1.7633	2.33847	2.90475	2.4683	2.60171	2.52809	2.37827
ENSG00000115841	151393	RMDN2	-4.02176	Down	-4.21372	-3.28323	-4.12571	-4.50815	-3.97016	-3.66406	-4.66678	-3.88208	-2.85001	-3.87185	-5.19094	-4.03443
ENSG00000116106	2043	EPHA4	-3.43711	Down	-3.26103	-2.87784	-3.49798	-1.54907	-3.04324	-2.68951	-3.89037	-4.85556	-4.60952	-3.03966	-5.37544	-2.5561
ENSG00000116604	4209	MEF2D	2.30902	Up	2.08407	1.96233	2.25294	2.79299	1.97002	1.96308	2.01377	2.90709	2.45194	2.93237	2.50098	1.87664
ENSG00000116661	26232	FBXO2	-3.4069	Down	-2.01581	-4.38939	-3.27527	-4.05385	-3.70393	-2.85613	-4.35338	-3.62689	-2.86098	-2.73336	-3.84429	-3.16957
ENSG00000116771	79814	AGMAT	-4.3298	Down	-4.15501	-4.36015	-5.1548	-3.98617	-4.49994	-3.85233	-5.09183	-3.0566	-3.82497	-3.67223	-5.07752	-5.22607
ENSG00000116991	57568	SIPA1L2	4.57975	Up	4.7457	4.15987	3.87404	5.94541	5.44498	5.27932	6.58736	3.48582	2.54181	2.24355	5.23884	5.4103
ENSG00000117091	962	CD48	-4.10389	Down	-3.84307	-3.91631	-4.3886	-4.92977	-4.62134	-3.94569	-4.60589	-3.90644	-3.45376	-3.88542	-3.35845	-4.39197
ENSG00000117122	4237	MFAP2	2.92084	Up	3.3646	2.3341	2.35603	2.50284	1.65789	4.08465	3.31978	2.07673	4.04146	3.95409	2.60646	2.75145
ENSG00000117245	57576	KIF17	3.73179	Up	3.45424	3.49556	4.05441	1.92159	3.39457	2.9341	4.38877	5.03849	5.18998	3.29065	3.72393	3.89527
ENSG00000117266	5129	CDK18	2.89679	Up	2.93656	2.13163	2.97826	3.33402	1.82669	2.00817	1.95085	4.05051	3.93994	4.54929	2.47766	2.57793
ENSG00000117280	8934	RAB29	-2.77372	Down	-2.42014	-1.95943	-3.11033	-3.13481	-3.41263	-2.70316	-2.63681	-3.14607	-2.60215	-2.79139	-2.04928	-3.31839
ENSG00000117602	11123	RCAN3	-3.58115	Down	-3.47757	-3.18728	-4.20914	-4.06859	-3.6953	-3.28676	-2.76471	-3.40615	-3.91602	-4.05194	-3.24895	-3.6614
ENSG00000117632	3925	STMN1	2.79862	Up	2.16887	2.73123	2.32236	2.41246	3.67548	3.39484	3.32016	1.98165	3.15525	2.88833	2.45438	3.07848
ENSG00000117724	1063	CENPF	2.79172	Up	1.95354	2.46398	2.64426	2.3357	3.69106	2.60658	3.22412	2.27986	3.17965	4.26429	2.15943	2.6981
ENSG00000118113	4317	MMP8	5.38943	Up	4.4119	6.55893	5.41775	5.71823	5.37017	3.87086	5.70813	5.25354	4.87825	5.17244	6.85176	5.46122
ENSG00000118193	9928	KIF14	2.90181	Up	2.36079	2.6604	2.51776	2.67797	3.50902	2.40117	3.55179	2.39947	3.0416	3.85314	2.60455	3.24411
ENSG00000118276	9331	B4GALT6	5.66189	Up	5.05002	5.74675	5.64963	4.55553	7.06928	7.09521	6.29695	4.72341	5.24115	4.6939	5.5315	6.28938
ENSG00000118513	4602	MYB	6.11642	Up	6.01109	6.28488	5.98861	5.39647	6.05455	6.15097	6.51546	6.02877	6.39797	6.73516	5.36449	6.46863
ENSG00000118523	1490	CCN2	7.78272	Up	7.15148	9.31043	10.1207	4.57513	9.38235	9.62402	7.86305	8.5603	6.79761	6.43769	6.5019	7.06795
ENSG00000118762	5311	PKD2	2.87025	Up	2.88322	2.59823	3.2168	2.67022	2.98172	2.59825	2.71615	2.36555	3.22262	2.9751	2.486	3.72913
ENSG00000118785	6696	SPP1	4.29814	Up	3.36489	2.85319	3.38689	6.17179	5.24719	4.27499	4.08221	3.36685	3.75764	2.51378	8.37075	4.1875
ENSG00000119326	8727	CTNNAL1	2.16366	Up	1.89412	2.10281	1.78021	1.88096	2.75729	2.06769	2.77385	1.6573	2.55871	2.17379	2.15736	2.15983
ENSG00000119535	1441	CSF3R	3.78958	Up	4.26547	4.18941	3.87562	1.90194	4.53108	4.97164	4.75508	3.48882	2.15309	2.15428	3.93674	5.25184
ENSG00000119865	25927	CNRIP1	2.57454	Up	2.00568	3.08382	2.69559	1.94244	2.51591	2.92681	2.44057	3.08269	2.24345	2.89461	2.98785	2.07507
ENSG00000119888	4072	EPCAM	2.58344	Up	2.26245	2.4406	2.54413	2.25103	3.50884	2.124	2.82477	2.64429	2.4029	2.60385	3.00476	2.38967
ENSG00000120051	159686	CFAP58	2.90506	Up	2.26616	2.66212	2.42151	2.55019	2.3889	1.74942	4.60098	3.26332	3.10689	2.82735	3.72791	3.29594
ENSG00000120217	29126	CD274	-3.09325	Down	-2.33636	-2.90367	-3.06872	-3.33311	-3.59623	-3.38705	-3.64787	-2.62629	-2.90686	-3.09022	-3.00337	-3.21926
ENSG00000120327	56122	PCDHB14	3.98974	Up	4.66983	1.66672	3.26717	4.36508	7.22393	5.02885	3.80465	3.21501	2.87357	2.5042	3.27587	5.98197
ENSG00000120896	10174	SORBS3	3.30153	Up	3.65318	3.17375	4.04794	2.81203	3.66655	3.44445	2.94656	3.46561	2.87751	3.28342	2.45424	3.79308
ENSG00000121005	83690	CRISPLD1	4.51146	Up	3.65532	4.84042	3.22647	4.07903	3.9984	2.61577	3.08702	7.43892	6.24822	6.90718	2.83317	5.2076
ENSG00000121053	8288	EPX	2.74603	Up	3.05543	3.06329	3.04438	2.15662	3.08086	3.20502	1.57099	3.39069	2.22135	2.11109	3.31632	2.73631
ENSG00000121089	389240	NACA3P	-3.21056	Down	-3.60804	-2.73895	-3.72413	-3.07509	-2.61729	-4.0205	-1.72656	-2.12179	-2.66312	-6.37518	-2.66293	-3.19307
ENSG00000121152	23397	NCAPH	2.21082	Up	2.05207	1.81692	2.01903	1.76946	2.85352	2.04077	2.85154	1.7702	2.52445	2.76901	1.52593	2.5369
ENSG00000121236	117854	TRIM6	3.49095	Up	2.30881	3.40957	3.52975	3.52452	4.35419	2.87777	4.51499	3.78796	3.39894	3.83639	2.19134	4.15723
ENSG00000121350	79912	PYROXD1	-2.45571	Down	-2.43179	-2.40329	-2.73005	-1.92373	-2.53927	-2.68238	-2.77657	-1.75067	-1.97637	-2.74182	-2.98202	-2.53052
ENSG00000122025	2322	FLT3	6.3395	Up	5.94494	5.93713	6.13699	5.44444	5.40134	5.43668	7.88599	8.2239	6.48861	3.7453	8.57061	6.85807
ENSG00000122585	4852	NPY	7.25723	Up	8.53046	6.08564	5.3441	7.11374	8.76016	8.04922	9.49371	5.76067	7.39609	8.22678	3.00883	9.31733
ENSG00000122644	10124	ARL4A	-3.16376	Down	-3.9001	-3.21793	-3.73552	-2.71397	-3.12061	-3.35495	-3.08986	-2.22137	-2.79008	-2.03044	-3.73881	-4.05149
ENSG00000122861	5328	PLAU	4.91094	Up	4.92424	4.95715	6.07005	5.23839	3.83217	3.42744	5.45114	4.38539	5.40663	5.59323	5.66773	3.9777
ENSG00000122966	11113	CIT	3.46904	Up	2.82001	3.29247	3.45261	2.89038	4.23661	3.19993	3.94744	3.04921	3.36494	4.71414	2.94272	3.71805
ENSG00000123405	4778	NFE2	4.76768	Up	4.99652	4.49203	5.17575	4.46025	4.42752	3.82007	5.81901	4.45316	4.59899	4.02295	6.10952	4.8364
ENSG00000123416	10376	TUBA1B	2.67891	Up	2.80711	2.11182	2.50864	2.17991	3.22756	2.75625	2.31723	2.53985	2.8709	3.91258	2.4239	2.49121
ENSG00000123473	6491	STIL	2.24328	Up	2.25458	1.66375	1.89339	2.10867	2.75489	2.10739	2.26328	1.94883	2.77273	2.85538	2.11564	2.18079
ENSG00000123485	55355	HJURP	3.4727	Up	3.2335	2.66626	3.32795	3.55516	4.21176	2.89095	3.75992	3.09742	3.7783	4.647	3.03332	3.47082
ENSG00000123700	3759	KCNJ2	5.2987	Up	5.07604	3.65532	3.55642	5.52345	7.1568	8.34468	4.98691	4.74638	3.30929	6.70818	4.26416	6.2568
ENSG00000124140	57468	SLC12A5	3.22858	Up	3.29446	3.03352	3.28708	3.63713	2.64521	4.10285	3.04261	1.92761	3.55361	3.84431	2.64608	3.72851
ENSG00000124216	6615	SNAI1	5.20311	Up	5.36955	5.15387	5.87026	5.34065	3.81348	4.72429	6.28008	3.29378	5.04666	4.48349	7.43319	5.628
ENSG00000124256	81030	ZBP1	-3.68835	Down	-3.2544	-3.8489	-3.74376	-3.12382	-3.58487	-3.56488	-3.74546	-3.48112	-3.99286	-3.80927	-4.26497	-3.84583
ENSG00000124313	23096	IQSEC2	3.91768	Up	4.10926	3.45823	4.83394	3.01055	4.87574	5.03243	4.17746	3.319	3.72037	2.22749	3.38668	4.86107
ENSG00000124370	84693	MCEE	-1.94335	Down	-2.23302	-1.76787	-2.07316	-2.18487	-1.81709	-2.27329	-1.6698	-1.50594	-1.6789	-2.36476	-1.94187	-1.80965
ENSG00000124374	400961	PAIP2B	-4.97566	Down	-6.42002	-5.32938	-6.26872	-3.11373	-4.92101	-3.8517	-4.01195	-4.66857	-4.73833	-5.34706	-6.03588	-5.0016
ENSG00000124429	79983	POF1B	-6.71869	Down	-6.71833	-6.61344	-6.73372	-6.96033	-6.74794	-6.5255	-6.77634	-6.73655	-6.68702	-6.63107	-6.78753	-6.70656
ENSG00000124469	1088	CEACAM8	3.97326	Up	2.60883	5.75179	4.02914	3.86501	4.09336	2.47339	4.17469	3.88843	3.41868	4.546	5.03821	3.79155
ENSG00000124657	26212	OR2B6	2.61276	Up	1.97561	2.80338	3.20501	2.33468	3.39567	2.87353	2.77173	2.35687	1.86195	3.28963	2.52405	1.96105
ENSG00000124721	1769	DNAH8	-4.64186	Down	-4.25497	-4.88049	-4.56049	-5.15623	-4.15693	-4.32892	-5.01947	-3.82812	-4.34756	-4.85265	-5.13104	-5.18545
ENSG00000124762	1026	CDKN1A	3.20436	Up	3.70325	2.69578	3.81376	3.88843	2.06659	2.50461	3.82188	2.58079	3.33426	3.31685	4.261	2.46512
ENSG00000124766	6659	SOX4	5.14644	Up	4.61492	4.59328	5.06021	6.09419	4.10408	4.62591	5.90526	4.7046	5.14582	6.03814	5.73541	5.13544
ENSG00000124780	89822	KCNK17	4.00671	Up	4.52425	2.924	5.55554	5.16199	2.76477	4.31953	4.77732	3.77473	4.91555	3.5877	1.84586	3.92924
ENSG00000124839	64284	RAB17	5.5638	Up	5.58769	4.01541	5.51403	6.28736	4.96087	4.92289	4.99564	5.73859	6.13344	6.48461	7.1437	4.98142
ENSG00000125319	78995	HROB	3.57486	Up	4.70023	2.77244	3.78544	3.30602	3.9289	4.07601	3.32313	3.081	3.61614	3.87792	2.87338	3.55772
ENSG00000125505	79143	MBOAT7	2.60703	Up	2.48692	2.72436	3.02066	3.31128	2.01886	2.54084	1.76243	3.15785	2.13049	2.51525	3.86397	1.75142
ENSG00000125538	3553	IL1B	3.56005	Up	3.84447	3.88575	3.07612	2.12278	3.17576	3.52068	5.21593	2.55247	1.65579	5.00789	4.34645	4.3165
ENSG00000125731	10045	SH2D3A	-3.28347	Down	-1.84159	-3.42263	-3.04465	-3.71192	-3.45144	-2.2665	-4.37961	-3.95876	-2.88297	-3.63766	-3.54243	-3.26147
ENSG00000125821	92675	DTD1	-4.06169	Down	-3.20868	-4.20339	-4.71066	-3.70353	-4.31945	-4.03588	-4.83227	-2.40329	-4.50543	-3.50645	-4.58077	-4.73053
ENSG00000125845	650	BMP2	7.23022	Up	8.95078	7.16031	8.20529	5.35776	8.95579	10.4148	9.97239	3.82377	7.83253	3.1045	2.93979	10.0449
ENSG00000126353	1236	CCR7	-3.27333	Down	-2.14079	-3.74812	-3.82742	-4.01374	-3.43498	-2.42145	-3.12848	-3.38429	-2.32768	-3.52422	-3.92667	-3.40211
ENSG00000126705	27245	AHDC1	3.5837	Up	3.61746	3.63771	4.09152	3.03193	3.67326	4.04617	2.46878	3.68382	3.83184	4.06319	3.33877	3.51994
ENSG00000126814	57570	TRMT5	-2.30088	Down	-1.81874	-1.98163	-2.59115	-2.42228	-2.31935	-2.29908	-1.91506	-2.46955	-1.91317	-3.4781	-1.86052	-2.54187
ENSG00000126821	81537	SGPP1	-2.55041	Down	-2.64925	-1.91731	-3.08053	-2.47034	-2.77326	-2.1316	-2.567	-3.04775	-1.9532	-1.97618	-3.78588	-2.25267
ENSG00000127423	79000	AUNIP	3.58071	Up	3.79467	3.37346	3.20264	2.98185	3.91839	3.48892	3.66679	3.27961	4.2208	4.06997	3.26651	3.70497
ENSG00000127533	9002	F2RL3	5.69646	Up	5.69751	3.34791	5.87228	6.64408	2.55567	3.65153	7.56648	4.72005	5.44343	8.4137	7.33283	7.11202
ENSG00000127564	9088	PKMYT1	5.66854	Up	6.45852	5.03037	6.65659	5.45908	5.67787	6.09316	4.7308	4.50846	5.88268	7.29358	5.11381	5.11752
ENSG00000128309	4357	MPST	2.5753	Up	2.83745	2.22106	2.67312	3.46289	2.26611	2.86964	1.86696	1.87495	2.52481	3.52745	3.09229	1.68687
ENSG00000128311	7263	TST	3.89654	Up	4.01188	3.59485	4.29401	4.40348	3.45826	4.26327	2.84808	2.96618	4.21472	5.54949	4.39644	2.75781
ENSG00000128322	3543	IGLL1	8.98844	Up	9.79587	7.16307	10.006	8.82558	8.50411	8.35454	7.23539	7.68221	10.3992	11.451	8.5612	9.88321
ENSG00000128408	26150	RIBC2	2.9376	Up	3.09164	2.59261	3.25071	1.68839	3.65983	2.33895	3.34373	2.4328	3.34085	3.37741	2.59549	3.53885
ENSG00000128602	6608	SMO	5.10122	Up	5.25524	3.04633	4.52307	5.28342	5.99019	6.00883	5.03456	4.32046	5.23126	6.22379	4.92101	5.37652
ENSG00000128683	2571	GAD1	3.02376	Up	3.56679	2.60483	2.65852	2.48755	3.77298	2.90567	2.28001	2.18265	2.9051	2.58915	4.59634	3.73551
ENSG00000128694	64172	OSGEPL1	-1.91411	Down	-2.18877	-1.65216	-2.23096	-1.71536	-2.25962	-1.97634	-1.84707	-1.60468	-1.70507	-2.18125	-1.84668	-1.76134
ENSG00000128833	55930	MYO5C	4.94528	Up	4.47281	5.62429	5.76361	5.22541	5.63511	4.97679	4.93068	1.87389	5.47387	4.67431	5.2444	5.44817
ENSG00000129173	79733	E2F8	4.37564	Up	4.58006	3.92541	4.19929	3.98269	4.70947	3.82282	4.47816	4.21689	5.02473	5.83593	3.53915	4.19307
ENSG00000129195	54478	PIMREG	4.34873	Up	3.96774	3.65365	4.47395	4.639	5.03026	4.61138	4.66383	3.12713	4.83079	6.29184	3.41071	3.48443
ENSG00000129993	863	CBFA2T3	4.75529	Up	4.12506	4.63244	5.07815	4.70945	5.74476	5.62552	3.81601	4.9455	4.08969	4.81271	5.00686	4.47728
ENSG00000130164	3949	LDLR	2.57048	Up	3.10262	2.83926	2.90512	2.12942	1.86951	2.45903	2.36442	2.54875	1.98264	2.10471	4.24286	2.29748
ENSG00000130202	5819	NECTIN2	6.71425	Up	6.84351	6.70951	6.95977	8.95279	5.20154	5.53567	6.59851	4.63121	6.9015	7.0346	8.5139	6.68847
ENSG00000130208	341	APOC1	3.02564	Up	2.98356	2.61917	3.41043	3.05984	3.53236	2.90132	3.10029	1.95043	3.08792	3.36705	3.37594	2.91937
ENSG00000130300	83483	PLVAP	5.32862	Up	5.71357	5.27836	5.89399	2.39593	3.48874	2.38034	9.25078	6.87389	6.03438	1.93098	6.00284	8.6996
ENSG00000130479	55201	MAP1S	2.44596	Up	3.63832	1.61175	2.48399	2.59835	2.13836	2.40281	1.7722	2.5227	2.55689	3.34392	2.31944	1.9628
ENSG00000130508	7837	PXDN	8.31577	Up	8.03857	8.57063	8.72442	8.56098	8.49088	8.97609	8.38317	5.27632	8.26275	9.84769	8.21875	8.43898
ENSG00000130517	54858	PGPEP1	-2.53246	Down	-2.55415	-1.50122	-2.8333	-2.32239	-3.03915	-2.11199	-2.55042	-1.59626	-2.44191	-3.15662	-2.5675	-3.71461
ENSG00000130529	54795	TRPM4	4.3261	Up	5.22192	2.61021	4.08752	3.17796	8.07119	8.22502	2.34545	3.40315	3.70689	2.17289	4.43714	4.45393
ENSG00000130545	92359	CRB3	-2.55683	Down	-1.88443	-2.69824	-2.71441	-2.46996	-2.22333	-2.13662	-2.91595	-2.60688	-2.49474	-2.55738	-2.9908	-2.98917
ENSG00000130635	1289	COL5A1	8.64127	Up	9.09188	8.67339	9.25488	8.58786	9.56602	9.92207	8.87246	5.12049	7.82447	8.87273	8.6394	9.26966
ENSG00000130821	6535	SLC6A8	4.61565	Up	5.58977	2.70955	5.37778	4.45727	5.25313	4.34692	4.27776	5.49484	4.22842	4.26519	5.14196	4.24518
ENSG00000130830	4354	MPP1	3.98739	Up	4.07655	4.10227	4.34133	3.23247	3.85418	4.00036	5.04982	3.16602	4.03803	4.32927	3.45239	4.20595
ENSG00000130881	4037	LRP3	4.59916	Up	5.04442	3.89354	4.18122	3.87135	3.48224	5.05266	5.40813	4.2209	4.15641	5.90896	5.41482	4.55525
ENSG00000130956	22927	HABP4	-3.53917	Down	-3.34673	-3.80875	-4.06736	-4.00723	-3.05723	-3.6121	-3.10947	-3.20401	-3.90097	-4.20849	-2.84022	-3.30753
ENSG00000131042	10288	LILRB2	4.84955	Up	4.6665	5.15872	5.57766	4.71285	4.62116	4.9656	4.59866	5.13021	4.04985	5.23662	4.22943	5.24735
ENSG00000131153	51659	GINS2	2.86786	Up	3.10616	2.39243	2.97276	2.29846	3.06301	3.21763	2.80295	1.76646	3.33258	4.29404	2.55879	2.60903
ENSG00000131507	80762	NDFIP1	-3.1602	Down	-3.3738	-2.47205	-4.53146	-2.64198	-1.78633	-2.81328	-2.44144	-3.9954	-3.35456	-3.41719	-4.08947	-3.0054
ENSG00000132003	65249	ZSWIM4	2.48228	Up	2.51945	2.08941	2.43489	2.61941	2.79312	2.69787	1.90676	2.70489	2.12744	3.43346	2.10497	2.35574
ENSG00000132321	79781	IQCA1	-3.02731	Down	-2.61571	-3.05541	-3.42385	-3.38491	-1.83336	-2.95828	-3.18209	-3.27276	-3.31808	-3.15637	-3.57506	-2.55182
ENSG00000132334	5791	PTPRE	3.07457	Up	2.83296	3.18356	2.55156	2.49957	3.16102	3.56395	3.95041	2.57097	2.3905	3.52091	3.02276	3.64667
ENSG00000132535	1742	DLG4	2.34229	Up	2.11378	2.39496	2.79011	2.4254	2.35702	2.44651	1.82024	2.08366	2.59531	2.45956	2.59939	2.0216
ENSG00000132613	92154	MTSS2	3.29663	Up	3.80346	1.99103	2.53261	5.95609	2.91462	3.33204	2.01337	3.83754	3.04737	3.8681	2.34544	3.91794
ENSG00000132623	63926	ANKEF1	-4.84152	Down	-4.44253	-4.71493	-5.16959	-5.1371	-4.75533	-4.53099	-5.47364	-4.79599	-4.9462	-4.75855	-5.43326	-3.94008
ENSG00000132640	22903	BTBD3	3.95658	Up	3.84004	3.89401	4.36757	4.91685	4.53761	4.89766	3.85931	2.85719	3.41486	3.81478	3.17459	3.90449
ENSG00000132846	84327	ZBED3	3.99939	Up	3.52711	4.59565	3.43765	4.554	3.44869	3.74001	4.28999	3.59891	4.2265	4.80375	3.94856	3.82189
ENSG00000132849	10207	PATJ	-4.32069	Down	-3.91484	-4.49253	-5.07045	-2.17202	-4.39095	-4.43268	-4.87435	-4.03627	-5.11802	-3.65341	-5.3724	-4.32033
ENSG00000133121	90627	STARD13	4.50144	Up	3.22537	5.50539	4.63197	7.81387	5.08142	3.85246	3.94954	6.6082	4.37787	1.78406	3.17451	4.0126
ENSG00000133134	84707	BEX2	-5.10334	Down	-3.68297	-5.69575	-5.73414	-5.36836	-4.76585	-4.12812	-5.32793	-5.25083	-5.10959	-5.37266	-5.27449	-5.52934
ENSG00000133246	84106	PRAM1	3.33275	Up	3.51464	4.00526	3.93384	2.26036	2.76234	2.49251	2.52734	4.42877	2.74294	3.44966	4.44341	3.43187
ENSG00000133321	5920	PLAAT4	-2.14528	Down	-1.62508	-2.18655	-2.26169	-2.17334	-2.1063	-1.68393	-2.93302	-2.55747	-1.52662	-1.70798	-2.61012	-2.37129
ENSG00000133328	54979	PLAAT2	-3.5653	Down	-3.02841	-3.81883	-3.7504	-3.9736	-3.50037	-3.14557	-3.65455	-3.39123	-3.45131	-3.54484	-3.71382	-3.8107
ENSG00000133454	84700	MYO18B	6.98571	Up	6.9702	4.74821	8.40509	4.65596	8.50361	8.73148	5.81927	7.21142	8.14514	7.58282	7.42565	5.62964
ENSG00000133488	284904	SEC14L4	2.86869	Up	2.89753	1.85892	3.30696	2.4663	3.49912	2.73617	2.80281	2.67428	2.68423	2.79958	3.62167	3.07673
ENSG00000133742	759	CA1	8.44992	Up	8.99453	7.00669	8.50931	8.03359	9.59816	8.09911	8.75342	7.55908	7.88024	9.11119	9.16578	8.6879
ENSG00000133958	57578	UNC79	5.73147	Up	5.92139	2.89782	4.51641	6.83916	8.86942	7.38551	6.05838	8.8852	3.23232	3.34164	4.65045	6.17994
ENSG00000133985	23508	TTC9	-3.46531	Down	-3.89824	-3.66104	-4.27635	-4.1801	-1.7032	-1.56505	-4.71429	-3.45907	-3.89773	-1.68914	-4.4893	-4.05024
ENSG00000134242	26191	PTPN22	-2.99265	Down	-2.32246	-2.85499	-2.87005	-4.0118	-3.16725	-2.64407	-3.47102	-2.93482	-2.9069	-3.8399	-2.91814	-1.97044
ENSG00000134243	6272	SORT1	3.94122	Up	2.75088	5.23453	5.34059	3.8185	3.84447	3.07027	2.23529	5.09559	3.35616	5.85933	3.69573	2.99328
ENSG00000134253	80263	TRIM45	2.733	Up	2.61399	2.09231	2.79183	3.33139	3.14916	2.66243	3.02371	2.26476	2.39368	3.03113	1.81289	3.62864
ENSG00000134297	51054	PLEKHA8P1	-2.22958	Down	-2.89327	-1.85688	-2.52769	-2.45792	-2.05223	-2.59961	-1.99428	-1.59142	-2.17588	-2.76024	-2.20597	-1.63958
ENSG00000134323	4613	MYCN	3.43359	Up	4.26788	2.43439	2.71921	2.90909	5.00573	4.13288	4.25951	3.64018	2.34461	3.88494	1.537	4.06771
ENSG00000134369	89796	NAV1	5.55732	Up	5.65838	6.52315	6.38975	5.65682	5.37767	4.97391	6.53272	2.66459	6.22993	5.22419	4.88202	6.5747
ENSG00000134531	2012	EMP1	5.47131	Up	4.71437	7.50197	6.07942	4.76456	4.32484	4.81678	7.33656	5.52705	5.42633	3.14876	6.79243	5.22266
ENSG00000134569	4038	LRP4	3.65719	Up	3.42587	3.1583	2.78959	2.76511	3.03099	2.79636	2.15816	4.82094	3.86327	8.30862	3.71155	3.05746
ENSG00000134690	55143	CDCA8	3.12753	Up	3.16768	2.43754	2.98718	3.05517	3.8906	2.95217	2.98584	2.82736	3.57296	4.01859	2.69327	2.94203
ENSG00000134709	51361	HOOK1	-4.76996	Down	-4.15326	-5.53563	-5.41509	-5.10817	-4.08127	-4.14563	-4.65767	-4.88709	-4.90682	-4.91122	-4.78575	-4.65191
ENSG00000134716	1573	CYP2J2	-3.58895	Down	-3.4746	-3.89179	-3.78493	-2.62119	-3.37889	-3.51711	-3.96581	-3.78721	-3.81956	-3.41118	-3.61283	-3.80227
ENSG00000134802	29015	SLC43A3	2.68249	Up	2.57657	2.88341	2.54472	1.96496	2.64743	2.67392	3.71166	2.06383	2.96038	2.9885	2.10161	3.07283
ENSG00000134824	9415	FADS2	4.85438	Up	5.17388	3.72142	5.64659	5.01734	4.80236	4.78684	3.79881	5.05621	5.15815	5.9613	5.02941	4.1003
ENSG00000134954	2113	ETS1	-3.52193	Down	-3.66571	-4.01183	-4.13633	-2.78305	-2.55118	-2.15403	-4.13661	-3.69339	-3.67091	-3.77271	-3.77445	-3.91298
ENSG00000134986	9315	NREP	4.68558	Up	3.8557	3.98315	3.88014	5.51503	5.06989	5.31628	4.69104	4.66477	5.19151	5.52063	4.16854	4.37026
ENSG00000135083	79616	CCNJL	5.43514	Up	3.82341	3.12604	3.74849	8.54068	7.60384	7.7061	3.43838	6.37658	3.64554	5.80646	7.86639	3.53973
ENSG00000135269	26136	TES	-4.73958	Down	-4.4889	-3.15696	-5.52614	-5.91156	-4.75729	-4.20822	-5.34352	-3.29314	-3.70377	-5.47689	-5.2999	-5.70868
ENSG00000135272	29969	MDFIC	-3.64315	Down	-3.14203	-2.23821	-1.84354	-4.71334	-3.85622	-3.93787	-3.9108	-4.04116	-4.01987	-5.41869	-3.6066	-2.98951
ENSG00000135363	4005	LMO2	2.94223	Up	2.06425	3.715	2.5111	2.21444	2.42143	2.5528	4.1522	4.11592	2.49075	2.08949	4.46858	2.51082
ENSG00000135423	27165	GLS2	-4.0405	Down	-3.3294	-4.66221	-4.11937	-3.84689	-3.93701	-3.53211	-4.3941	-4.43608	-4.23864	-3.5423	-4.16816	-4.27974
ENSG00000135451	10024	TROAP	3.90298	Up	4.1266	3.19759	4.30655	3.71364	4.50672	4.1337	3.56379	3.10672	3.96801	5.05822	3.53778	3.61645
ENSG00000135476	9700	ESPL1	4.2098	Up	4.37631	3.81477	4.81775	3.88063	4.56356	3.91935	3.84023	3.87955	4.43829	5.50187	3.83587	3.64936
ENSG00000135540	57224	NHSL1	4.75524	Up	3.64939	4.72041	3.46596	5.42912	4.81005	4.22824	5.20449	5.19368	4.98036	6.55221	4.34772	4.48126
ENSG00000135636	8291	DYSF	3.37239	Up	4.0386	4.1898	3.1816	3.19159	2.5237	2.0776	2.97608	3.73935	3.74633	3.75945	3.33023	3.71434
ENSG00000135678	1368	CPM	2.69737	Up	2.13644	3.16267	2.24194	3.30101	1.98177	2.17651	2.53746	2.45537	3.86029	4.07081	1.91673	2.5274
ENSG00000135898	9290	GPR55	-3.50038	Down	-2.84598	-2.39674	-3.7084	-4.39685	-4.03221	-3.58376	-3.51621	-2.59753	-3.36775	-3.96431	-3.76144	-3.83333
ENSG00000135951	80705	TSGA10	-2.80536	Down	-3.15781	-3.12979	-3.27096	-2.51394	-2.67695	-2.91385	-2.81715	-2.36052	-2.58787	-3.42475	-2.22121	-2.58955
ENSG00000136003	23479	ISCU	-2.07995	Down	-1.95748	-1.83998	-2.23273	-1.92881	-2.00709	-2.03357	-2.03055	-1.7605	-2.28302	-2.52411	-2.15246	-2.20904
ENSG00000136014	84101	USP44	-5.97413	Down	-5.60263	-5.87715	-6.41976	-6.38307	-5.77926	-5.15013	-5.97402	-5.7473	-6.06529	-6.77573	-5.86719	-6.04809
ENSG00000136149	100287887	RPL13AP25	-2.46062	Down	-2.88872	-3.13528	-3.11388	-2.56894	-2.18497	-3.04928	-1.78293	-2.09387	-1.65165	-2.83094	-2.2088	-2.01822
ENSG00000136158	10253	SPRY2	6.6671	Up	6.6535	6.51197	5.99141	5.67108	7.43462	7.32097	6.87057	6.84621	7.42444	6.01099	6.38583	6.88357
ENSG00000136295	80727	TTYH3	4.31707	Up	4.30512	3.83695	4.36267	4.46285	4.18862	4.44628	3.17755	5.57301	4.0001	5.67726	4.27582	3.49864
ENSG00000136378	11173	ADAMTS7	4.04892	Up	3.18543	2.51982	3.10874	6.81189	5.18186	4.2582	2.22262	3.78559	2.6785	7.60683	4.40692	2.82063
ENSG00000136560	10010	TANK	-2.26267	Down	-2.00305	-1.75991	-2.58419	-2.24731	-2.48243	-2.68572	-2.375	-2.13672	-2.25871	-2.49877	-2.32522	-1.79501
ENSG00000136630	3142	HLX	5.09446	Up	4.88281	5.05536	5.7745	5.45149	5.73661	5.09469	5.74517	5.69352	4.65599	2.89817	5.55489	4.59036
ENSG00000136807	1025	CDK9	2.08991	Up	2.28201	2.14353	2.76557	1.56426	1.67211	2.11677	1.8434	1.73966	2.37222	2.20925	1.88859	2.48157
ENSG00000136877	2356	FPGS	2.99526	Up	3.7262	2.68732	3.97816	2.75023	2.04719	3.22631	1.98022	2.75068	3.11772	3.87622	2.78915	3.01365
ENSG00000136982	79075	DSCC1	2.69783	Up	2.34562	2.81797	2.08274	2.29909	3.15238	2.42365	3.51083	2.37157	3.06428	2.8086	2.65061	2.84663
ENSG00000137198	2766	GMPR	3.4024	Up	4.11529	2.36186	2.88105	3.96061	4.35885	2.8731	3.89983	3.32999	2.76968	3.02304	3.8585	3.39704
ENSG00000137225	11131	CAPN11	4.2148	Up	3.93578	5.9071	5.28796	3.66164	2.94995	2.12777	5.828	4.10252	4.69601	2.53997	5.08159	4.4593
ENSG00000137343	79969	ATAT1	2.38316	Up	2.28264	2.05426	2.24505	2.40296	2.72478	2.37584	2.3944	2.61469	2.10987	2.76765	1.97955	2.6462
ENSG00000137404	11270	NRM	2.9082	Up	3.0804	2.41252	3.08582	2.54311	2.65376	3.32488	2.82897	3.22714	2.84543	3.79818	2.8346	2.26359
ENSG00000137804	51203	NUSAP1	2.35572	Up	2.31565	1.9365	2.35321	2.00588	2.70234	1.94793	2.71576	1.6852	2.84166	3.78265	1.89171	2.0901
ENSG00000137962	9411	ARHGAP29	6.14799	Up	6.35909	6.26523	4.83874	5.2347	10.0086	10.9007	5.35392	1.75433	6.37539	7.12156	2.02261	7.54087
ENSG00000138080	11117	EMILIN1	3.71507	Up	4.02647	4.4281	4.31901	2.78345	3.88357	1.93398	4.34787	2.6194	3.97364	4.79676	2.72237	4.74623
ENSG00000138134	57559	STAMBPL1	-3.05196	Down	-2.96561	-2.89458	-3.31125	-3.85758	-3.9537	-3.86149	-3.76172	-1.88794	-2.00081	-2.43312	-3.65123	-2.04454
ENSG00000138193	51196	PLCE1	-2.62167	Down	-3.27584	-3.24092	-2.30079	-2.65742	-2.03278	-2.88296	-1.82988	-1.9289	-2.83719	-3.18511	-2.37478	-2.9134
ENSG00000138356	316	AOX1	4.4604	Up	3.11153	3.74486	2.75049	6.45703	2.23222	2.85618	3.30186	6.14432	4.90466	10.1141	4.99983	2.90777
ENSG00000139116	55605	KIF21A	-3.95249	Down	-3.70722	-3.13324	-3.87978	-4.98629	-3.73451	-4.19	-4.32342	-4.97981	-3.8194	-2.83743	-4.41474	-3.42408
ENSG00000139292	8549	LGR5	6.56989	Up	8.11225	5.80993	6.37596	9.00677	6.57428	8.81278	6.83119	3.36744	6.08122	5.62117	3.97895	8.2667
ENSG00000139318	1848	DUSP6	3.67862	Up	2.59013	5.01741	4.41235	3.31884	3.97448	3.88635	4.38192	2.32293	3.35155	3.63194	4.06716	3.18838
ENSG00000139344	144193	AMDHD1	-3.37829	Down	-3.48147	-3.33459	-3.45363	-2.82444	-3.77447	-3.53516	-4.31775	-2.50619	-3.71186	-2.93538	-3.11055	-3.55399
ENSG00000139354	283431	GAS2L3	5.45766	Up	6.03586	5.06491	4.10828	5.03296	6.08484	5.84764	6.99793	6.31395	5.02401	5.27749	4.195	5.50902
ENSG00000139537	85478	CCDC65	-4.37041	Down	-4.30001	-4.39937	-4.30641	-5.3544	-3.71893	-4.08789	-4.51178	-4.20294	-4.1138	-5.09247	-4.28437	-4.07254
ENSG00000139734	81624	DIAPH3	3.88027	Up	3.77219	3.65208	3.85672	3.28409	4.55935	3.77779	4.34569	3.34631	3.87397	4.52831	3.28801	4.27869
ENSG00000140030	8477	GPR65	-3.35257	Down	-3.16755	-2.87652	-3.58816	-4.99063	-3.9833	-3.35699	-1.80319	-2.29552	-2.77542	-4.99393	-3.90407	-2.4956
ENSG00000140379	597	BCL2A1	-2.79034	Down	-2.28309	-2.0227	-3.35293	-3.59388	-2.50703	-2.72018	-2.73547	-2.84661	-3.24257	-3.24259	-2.1969	-2.74015
ENSG00000140525	55215	FANCI	2.05067	Up	2.03208	1.62741	2.10982	1.6052	2.61523	1.7648	2.02091	1.88895	2.399	2.64317	1.61888	2.28263
ENSG00000140534	90381	TICRR	4.55973	Up	4.59147	4.20029	4.67286	4.05839	5.19959	4.18182	5.03538	4.03254	4.80988	5.27358	3.90851	4.75241
ENSG00000140675	6524	SLC5A2	-2.39224	Down	-2.78549	-2.56963	-2.30396	-2.89021	-1.78396	-2.15327	-2.31586	-1.7487	-2.48754	-2.91227	-2.86467	-1.89135
ENSG00000140682	7041	TGFB1I1	3.70046	Up	3.94084	3.01669	4.01545	3.3254	4.4148	4.99954	2.82255	4.19243	3.42791	3.63081	2.82369	3.79543
ENSG00000140848	221184	CPNE2	5.74897	Up	5.96617	6.00163	6.4093	4.71249	6.88883	7.09	4.82022	4.52153	5.59229	5.87187	5.64762	5.46576
ENSG00000141293	8631	SKAP1	-4.13035	Down	-3.5937	-4.36745	-4.48502	-5.13437	-3.58127	-3.34578	-4.51416	-3.9276	-3.99796	-3.74008	-4.74142	-4.13539
ENSG00000141337	22901	ARSG	-2.51943	Down	-1.84418	-2.14664	-2.89638	-3.31142	-2.87075	-1.97553	-2.85922	-2.55747	-2.53136	-2.01461	-3.37057	-1.85502
ENSG00000141905	4782	NFIC	2.40223	Up	2.02742	3.05302	2.89111	2.17032	2.53986	2.09481	2.07591	2.52778	2.39385	2.06008	2.83623	2.15635
ENSG00000142089	10410	IFITM3	4.16252	Up	4.59984	5.19445	5.36696	4.13152	3.01437	4.62699	3.6829	2.80509	4.35365	3.77306	4.99646	3.40494
ENSG00000142185	7226	TRPM2	4.57617	Up	4.56635	4.84279	5.24067	4.65924	3.61888	3.9175	5.22558	4.73803	4.65051	3.67971	4.7007	5.07414
ENSG00000142798	3339	HSPG2	4.26926	Up	5.07937	4.10657	4.43127	4.49137	4.75744	3.88789	3.82636	4.00756	3.85582	3.55135	4.54331	4.6928
ENSG00000142910	64129	TINAGL1	4.23226	Up	4.83809	3.76924	4.5974	4.55411	3.70236	4.1497	1.97595	2.79619	5.85001	6.12555	4.3803	4.04824
ENSG00000142945	11004	KIF2C	2.89282	Up	2.75747	2.34081	2.75029	2.75584	3.63546	2.75806	3.22007	2.51052	3.20018	3.24143	2.62798	2.91575
ENSG00000142949	5792	PTPRF	5.69008	Up	5.54142	4.40854	5.04431	6.47143	7.83936	7.09438	3.99879	5.10497	5.36604	6.92662	4.90285	5.58221
ENSG00000143061	3321	IGSF3	4.35697	Up	2.91852	2.74771	3.12092	5.48536	6.16886	6.16905	4.59809	3.16587	3.19835	8.35292	1.90575	4.45224
ENSG00000143126	1952	CELSR2	3.74993	Up	3.87946	1.98628	3.77116	4.32302	3.83768	3.88342	2.98673	4.07187	4.03276	5.68568	2.57435	3.9668
ENSG00000143369	1893	ECM1	6.69497	Up	7.79877	7.40192	7.93743	2.57226	7.17957	7.32764	7.59183	4.59674	8.29262	4.90814	6.45732	8.27537
ENSG00000143416	8991	SELENBP1	5.43314	Up	6.41939	3.63446	5.62678	5.1267	6.47487	5.53211	5.46615	5.08101	4.85695	5.53627	6.00437	5.43859
ENSG00000143434	10500	SEMA6C	6.12021	Up	6.95647	4.87105	6.74393	5.89009	6.16026	5.9956	5.66849	5.08954	7.04836	7.25818	5.34647	6.41408
ENSG00000143476	51514	DTL	4.12759	Up	4.19111	3.49351	3.91133	4.01292	4.72913	4.2088	4.42438	3.34201	4.37913	5.04745	3.76542	4.02584
ENSG00000143479	8444	DYRK3	7.03952	Up	6.61342	6.57415	6.86947	6.18663	7.56446	7.85246	7.93568	5.7922	6.21344	8.139	7.04449	7.68886
ENSG00000143545	5872	RAB13	4.75912	Up	3.65084	5.3163	4.66153	4.57906	5.05416	4.77898	5.0569	4.83544	4.98541	3.80287	5.9366	4.45132
ENSG00000143554	11000	SLC27A3	2.56011	Up	2.41299	2.45146	3.32123	1.77581	3.00091	3.36667	2.56751	2.12048	2.14794	1.9951	2.22698	3.33419
ENSG00000143627	5313	PKLR	3.40846	Up	3.18024	2.44231	3.97543	3.07712	4.03823	3.30032	3.39909	2.32202	3.27127	3.89524	4.35787	3.64232
ENSG00000143653	51097	SCCPDH	2.3761	Up	2.13363	2.16664	2.16831	1.81212	2.09893	1.91869	2.49628	2.84937	2.44265	3.63937	2.46525	2.32197
ENSG00000143797	129642	MBOAT2	3.91126	Up	3.39099	3.69645	4.13474	3.43444	3.97383	4.04715	4.23693	4.08253	3.68558	3.51169	5.00142	3.73932
ENSG00000143819	2052	EPHX1	2.41849	Up	2.70468	1.87873	2.11195	2.01001	1.85959	1.921	1.96498	3.21939	2.83437	3.43404	2.61775	2.46543
ENSG00000143869	151449	GDF7	-5.30846	Down	-4.87908	-5.4116	-5.10644	-5.30889	-5.21265	-4.15312	-5.38508	-5.6875	-5.38991	-5.32822	-5.87827	-5.96075
ENSG00000143924	27436	EML4	-2.62032	Down	-2.43137	-2.49468	-3.01376	-2.35999	-2.4602	-2.76474	-3.3468	-2.42721	-2.28068	-2.0866	-2.91892	-2.85885
ENSG00000144354	83879	CDCA7	2.99812	Up	2.91598	2.69798	2.86223	2.53994	3.50819	3.18421	3.22253	3.33118	3.13079	3.4812	2.00837	3.09481
ENSG00000144395	284992	CCDC150	2.5979	Up	2.69082	2.13599	2.54244	2.328	3.34776	2.26873	3.10511	2.18115	2.57884	2.72816	2.03371	3.23408
ENSG00000144644	339896	GADL1	3.32124	Up	2.14299	5.11485	3.1159	2.64542	3.61452	3.97883	3.91923	2.22894	2.83138	2.5638	3.04038	4.65865
ENSG00000144648	1238	ACKR2	2.67746	Up	2.45589	2.1153	2.23441	2.26075	4.10316	4.24646	2.20833	2.33591	2.31768	2.42231	2.18511	3.24417
ENSG00000144668	3680	ITGA9	6.42804	Up	5.12424	7.1743	6.77424	6.13327	4.09139	4.11396	4.43605	8.78531	7.7218	8.58436	9.65805	4.53953
ENSG00000144677	10217	CTDSPL	3.94823	Up	4.19948	5.70614	4.65802	2.35339	4.10379	4.51532	4.19118	1.73762	4.58517	3.61143	4.38159	3.3357
ENSG00000144893	116931	MED12L	2.71559	Up	2.48722	2.31304	2.26794	1.75762	2.60635	2.02543	3.25716	5.03184	1.95038	5.04728	1.60488	2.2379
ENSG00000144935	7220	TRPC1	-4.77534	Down	-4.29151	-5.61685	-5.3741	-4.18955	-4.19275	-4.60174	-5.53122	-4.54889	-4.89626	-3.95267	-5.17445	-4.93407
ENSG00000145113	4585	MUC4	4.21448	Up	3.87293	8.13855	8.86404	2.58711	2.72045	2.24184	1.50022	5.76712	2.69885	5.54071	3.18334	3.45855
ENSG00000145284	79966	SCD5	3.75893	Up	3.55526	3.62475	3.67414	2.63886	3.40573	3.0177	4.76832	3.41232	4.28493	5.16758	4.38402	3.17357
ENSG00000145335	6622	SNCA	3.85297	Up	4.30352	3.77565	3.29277	3.11603	5.11518	3.58037	4.19865	4.19188	3.10945	3.79928	4.06558	3.68723
ENSG00000145358	115265	DDIT4L	5.26119	Up	4.65286	5.15475	3.79701	8.43574	3.23096	4.96006	10.0411	5.81937	3.8352	3.57609	4.06767	5.56354
ENSG00000145386	890	CCNA2	2.56307	Up	2.35608	2.16259	2.38443	2.41412	3.19131	2.569	3.19424	1.93666	2.82025	3.25985	2.37481	2.09345
ENSG00000145555	4651	MYO10	5.95698	Up	5.56204	6.82807	5.64213	5.39706	9.06481	8.20616	4.80977	4.4827	3.75329	5.23642	6.66842	5.83295
ENSG00000145700	256006	ANKRD31	-4.08664	Down	-3.74958	-4.51588	-4.76107	-3.54267	-3.67271	-4.33848	-4.0667	-4.1139	-3.99018	-4.1354	-4.45869	-3.69443
ENSG00000145723	54826	GIN1	-2.91465	Down	-3.1372	-2.86372	-3.21302	-3.07866	-2.79149	-2.75409	-2.08422	-3.36409	-2.56581	-3.82881	-2.84438	-2.45028
ENSG00000145779	25816	TNFAIP8	-3.88813	Down	-4.08535	-3.34491	-3.96087	-4.75868	-3.92086	-3.67505	-3.67896	-4.24821	-3.53229	-3.60498	-3.6067	-4.24069
ENSG00000145936	3779	KCNMB1	3.53174	Up	4.13987	4.74372	3.39489	1.84548	3.00893	3.74293	2.91348	3.38362	5.07107	4.17228	2.80565	3.15892
ENSG00000146072	27242	TNFRSF21	6.52065	Up	5.65026	6.55592	7.058	7.96536	7.91622	8.45195	5.49413	5.68519	5.34058	6.13093	6.05027	5.949
ENSG00000146094	79930	DOK3	4.52457	Up	4.68506	4.61363	5.15926	4.30442	4.38484	4.77713	4.33046	3.87673	4.24952	5.64014	4.20286	4.07075
ENSG00000146416	51390	AIG1	-3.14411	Down	-3.06611	-3.00548	-3.63737	-3.55222	-2.76616	-3.48354	-3.10488	-3.83312	-1.93198	-2.97346	-3.6899	-2.68514
ENSG00000146535	2768	GNA12	2.38604	Up	2.58657	1.74412	2.27894	2.53581	2.19303	2.77925	1.54261	3.61998	2.00168	2.87252	2.71302	1.76502
ENSG00000146670	113130	CDCA5	4.18932	Up	4.32296	3.8015	4.02554	4.32345	4.41808	4.28545	4.4069	3.36821	4.4919	4.8918	4.13853	3.79756
ENSG00000146858	92092	ZC3HAV1L	2.76937	Up	2.26414	2.42976	2.61603	3.15995	3.60652	3.23582	2.52914	2.96977	2.7062	2.35384	2.28462	3.0767
ENSG00000147231	55086	RADX	-5.28032	Down	-5.09136	-5.38785	-5.59749	-4.50444	-4.48071	-5.31382	-5.15222	-5.81934	-5.87538	-4.75853	-6.18435	-5.19835
ENSG00000147234	84443	FRMPD3	-3.50128	Down	-2.90887	-4.00528	-3.0223	-4.49213	-3.45838	-2.78172	-4.05532	-3.09622	-3.7588	-2.8348	-4.17843	-3.42307
ENSG00000147457	91782	CHMP7	-3.15854	Down	-2.44922	-3.2561	-3.44672	-3.54629	-2.91056	-2.5782	-3.13482	-3.34382	-3.34236	-3.76093	-3.07774	-3.0557
ENSG00000147606	115111	SLC26A7	-2.84594	Down	-2.89075	-3.16936	-3.17992	-2.69359	-2.25052	-2.52407	-3.19002	-2.29469	-3.0037	-3.10492	-2.64579	-3.20395
ENSG00000148180	2934	GSN	3.60575	Up	4.09441	4.18993	4.69658	2.05909	3.72236	4.58944	3.32517	3.72645	4.42687	2.55174	1.55674	4.33019
ENSG00000148200	2649	NR6A1	2.70011	Up	2.63923	3.32759	3.08991	2.79662	2.34396	2.5738	2.8403	2.25719	2.51891	2.07024	3.91087	2.03266
ENSG00000148346	3934	LCN2	4.58475	Up	4.13963	5.46421	4.55052	4.9591	4.67227	2.76663	4.69535	4.52372	4.00018	5.27522	5.47508	4.49507
ENSG00000148426	254427	PROSER2	4.66374	Up	4.92067	4.67411	3.94939	5.36386	4.81132	4.80448	4.52871	4.90307	4.30802	3.93732	5.56966	4.19423
ENSG00000148737	6934	TCF7L2	4.59753	Up	4.32197	4.84065	4.38107	5.05481	5.10591	4.76553	4.96008	3.22909	4.64309	4.55135	4.87236	4.44446
ENSG00000148773	4288	MKI67	4.15395	Up	3.65743	4.09054	3.93894	3.30104	5.1961	3.67204	4.7655	3.92478	4.63588	5.56485	2.88931	4.21095
ENSG00000148926	133	ADM	4.20744	Up	4.75488	4.20824	4.5876	4.75748	2.93364	3.3674	5.41733	2.92442	4.2562	3.28422	5.84838	4.14943
ENSG00000149131	710	SERPING1	5.73346	Up	5.54169	5.53991	4.85053	5.91749	6.77348	6.56512	6.29007	5.71701	5.62634	4.57549	4.0968	7.30758
ENSG00000149292	54970	TTC12	-4.7706	Down	-4.37297	-5.00997	-4.71305	-5.63803	-4.37502	-4.15218	-4.33626	-5.3597	-4.77575	-4.92054	-5.05103	-4.54265
ENSG00000149485	3992	FADS1	3.93662	Up	3.65422	3.03587	3.89989	4.69569	3.62072	3.58142	4.02863	3.60263	4.16552	4.87203	4.68298	3.39985
ENSG00000149554	1111	CHEK1	2.25546	Up	2.2403	1.93959	1.95723	1.85431	2.70369	2.1055	2.92596	1.54947	2.48406	2.74275	1.88238	2.68026
ENSG00000149639	140710	SOGA1	3.59547	Up	3.04952	3.1177	3.81963	3.48455	3.68308	3.49366	3.49261	3.76245	3.38779	4.75767	3.66886	3.42815
ENSG00000149926	83723	TLCD3B	3.15794	Up	3.45984	3.18135	3.22807	2.63271	3.15791	2.55999	2.94936	2.85372	3.56888	4.2447	2.33714	3.72163
ENSG00000149948	8091	HMGA2	2.79655	Up	2.76713	2.26923	2.76664	1.9466	3.25957	2.63392	3.37993	4.74776	2.22442	1.96455	2.53501	3.06387
ENSG00000150593	27250	PDCD4	-2.19273	Down	-2.03473	-1.97064	-2.65411	-2.22118	-2.06072	-2.3021	-1.61648	-2.17035	-1.86501	-2.9493	-2.44863	-2.01947
ENSG00000150627	116966	WDR17	-3.93442	Down	-3.6659	-4.33278	-3.9619	-4.37179	-3.66135	-3.95661	-4.4601	-2.73599	-4.02917	-3.58256	-4.43126	-4.02367
ENSG00000150636	79839	CCDC102B	-2.77933	Down	-3.31853	-2.49938	-2.33849	-2.47193	-2.11175	-3.17558	-3.55724	-2.37112	-2.76938	-3.69336	-2.5494	-2.49581
ENSG00000150760	1793	DOCK1	5.15821	Up	3.96294	5.22974	4.15681	6.30068	5.72211	7.03554	4.74829	4.08851	3.07879	6.83456	3.19758	7.54296
ENSG00000150867	5305	PIP4K2A	-2.76813	Down	-3.14652	-2.44813	-3.12688	-2.97678	-2.52396	-2.45516	-2.35148	-2.44083	-2.97337	-3.11348	-2.75196	-2.90897
ENSG00000151150	288	ANK3	-4.46761	Down	-3.90268	-4.97314	-4.72074	-5.23582	-3.57917	-3.54789	-4.92941	-4.16196	-4.46369	-4.98189	-4.84512	-4.26984
ENSG00000151229	114134	SLC2A13	-3.00417	Down	-3.27207	-3.23956	-3.54823	-3.61678	-2.70842	-2.92312	-3.44392	-2.30284	-2.62134	-2.80044	-2.83746	-2.73587
ENSG00000151292	1456	CSNK1G3	-2.4637	Down	-2.50023	-2.32776	-4.209	-2.28651	-2.01813	-2.03723	-2.13743	-2.19919	-2.28892	-3.0475	-2.32594	-2.1865
ENSG00000151320	9472	AKAP6	-4.25495	Down	-4.02625	-3.75973	-4.18064	-3.27826	-4.10015	-3.96736	-4.94595	-5.64565	-4.26749	-4.78911	-4.17605	-3.92279
ENSG00000151376	10873	ME3	5.16982	Up	5.90985	5.49956	6.12937	6.05469	3.40029	3.48165	4.40514	5.51801	5.58151	5.71955	5.13231	5.20586
ENSG00000151458	57182	ANKRD50	4.0007	Up	3.08758	4.47025	3.13385	3.38572	5.17407	5.44451	5.19064	3.45401	2.67668	4.6585	2.35003	4.98259
ENSG00000151575	374618	TEX9	-3.405	Down	-3.54221	-3.31803	-4.05991	-2.35378	-3.34824	-3.91459	-3.80582	-2.6064	-3.30833	-4.06189	-3.15533	-3.38546
ENSG00000151693	8853	ASAP2	6.35889	Up	5.1137	4.89539	5.72321	5.8143	7.43439	6.836	6.01702	7.58529	5.63275	7.60818	6.85859	6.78788
ENSG00000151725	79682	CENPU	3.12526	Up	3.08191	2.71677	2.77092	3.25265	3.58223	3.02894	3.54365	2.6916	3.2878	3.5771	2.99021	2.9793
ENSG00000152104	5784	PTPN14	5.52063	Up	4.1554	8.57733	5.35181	4.07408	4.52984	8.09876	4.97369	8.95181	7.34574	2.379	3.01048	4.79964
ENSG00000152611	133690	CAPSL	3.63668	Up	3.1471	2.14435	3.636	2.40048	3.0105	3.26929	3.92582	5.54776	5.27141	4.89589	2.56937	3.82224
ENSG00000152689	25780	RASGRP3	-3.49013	Down	-3.32336	-3.27051	-4.29017	-3.01579	-3.18553	-3.26515	-3.72126	-3.03264	-3.99872	-4.65572	-1.84596	-4.27673
ENSG00000152953	55351	STK32B	8.89506	Up	9.15047	9.32395	9.66797	9.79528	9.7646	9.71149	9.40032	5.51135	8.65426	7.89627	8.27196	9.59277
ENSG00000153363	84791	LINC00467	-2.97463	Down	-4.28905	-1.86336	-2.61084	-2.73068	-3.19968	-2.9633	-3.02769	-3.9832	-2.86609	-2.78333	-2.30442	-3.07392
ENSG00000153404	153478	PLEKHG4B	8.29936	Up	8.85931	5.5208	8.44765	9.68993	9.97457	9.62001	6.34349	3.42965	9.97124	10.4574	8.38698	8.89131
ENSG00000153531	113622	ADPRHL1	5.26054	Up	3.97929	3.41848	4.71763	7.73512	5.92311	4.86856	5.89178	4.32883	5.36439	6.4388	6.91968	3.54077
ENSG00000153885	79047	KCTD15	4.51325	Up	4.70649	3.28928	4.62461	5.40471	4.5082	4.78574	4.27753	3.2116	4.33762	5.28968	4.89093	4.83259
ENSG00000154127	84959	UBASH3B	3.24452	Up	2.98462	3.5799	3.47479	2.08182	2.31079	3.51598	3.80552	3.87259	2.82479	4.39519	2.35714	3.73116
ENSG00000154165	2838	GPR15	-5.7211	Down	-4.6399	-6.16839	-5.93056	-6.05615	-5.26069	-4.48666	-5.84024	-6.37733	-5.6246	-6.59849	-5.79147	-5.87878
ENSG00000154237	79705	LRRK1	2.96404	Up	2.98043	2.95951	3.57453	2.95887	2.17627	2.08348	2.90275	3.24149	3.10867	3.0131	3.66003	2.90929
ENSG00000154263	10349	ABCA10	-3.21554	Down	-2.5625	-3.7133	-3.32956	-3.81203	-3.07091	-3.34236	-3.80109	-2.82013	-3.63726	-3.56861	-2.74482	-2.18392
ENSG00000154265	23461	ABCA5	-3.32818	Down	-3.04816	-4.23902	-4.10052	-3.88574	-2.28121	-2.63137	-3.77284	-3.7766	-4.11361	-3.21996	-2.85553	-2.01363
ENSG00000154447	57630	SH3RF1	5.40607	Up	5.3448	5.53931	5.19797	5.03508	5.22078	5.84209	6.63228	5.68565	5.0109	4.48185	5.15266	5.72945
ENSG00000154511	388650	DIPK1A	-3.02876	Down	-2.84605	-2.73213	-3.37482	-2.84551	-3.17025	-2.8969	-2.388	-3.05303	-3.10338	-3.45347	-3.82929	-2.6523
ENSG00000154611	143471	PSMA8	-4.37467	Down	-4.04346	-4.40295	-4.72199	-4.96742	-3.5789	-3.36232	-4.65554	-4.74932	-4.13134	-5.06028	-4.77654	-4.04601
ENSG00000154814	92106	OXNAD1	-2.54981	Down	-2.32461	-2.59004	-2.79882	-2.51708	-2.29653	-2.40622	-2.40875	-2.86416	-2.68193	-3.08644	-2.43848	-2.18471
ENSG00000154856	147495	APCDD1	5.19435	Up	4.69862	4.1797	5.02812	6.01552	5.9117	6.47469	5.58735	4.93698	5.02234	6.05676	2.70288	5.71751
ENSG00000154914	124739	USP43	5.51522	Up	5.26685	4.5401	5.14306	5.81076	5.86822	5.79293	4.86697	7.06966	5.2748	6.59721	5.71823	4.23382
ENSG00000154978	81552	VOPP1	-2.6469	Down	-2.54396	-2.16075	-2.78043	-2.31468	-3.4516	-1.97112	-2.16474	-3.61554	-2.47338	-2.39107	-2.72683	-3.16872
ENSG00000155016	113612	CYP2U1	-3.16946	Down	-3.48159	-3.28296	-3.78152	-1.65741	-2.90919	-3.11656	-2.76563	-2.6694	-4.09381	-4.17759	-3.58971	-2.50809
ENSG00000155158	158219	TTC39B	-3.91202	Down	-3.44468	-3.51719	-4.34285	-4.90205	-3.1888	-3.19081	-3.94769	-3.99015	-4.28348	-4.22584	-3.93437	-3.97636
ENSG00000155254	83742	MARVELD1	4.70924	Up	4.39252	5.17883	4.34832	4.75822	4.67277	5.30819	5.83781	2.79658	4.82554	4.59203	5.08163	4.71849
ENSG00000155749	130540	FLACC1	-3.04303	Down	-3.46585	-3.3862	-2.81651	-3.63571	-2.91046	-3.61427	-3.19979	-2.28753	-2.72539	-2.76346	-3.1851	-2.52612
ENSG00000155926	6503	SLA	-2.87638	Down	-3.07713	-2.20232	-2.8832	-3.36214	-3.55063	-2.6158	-2.9604	-1.70978	-2.64626	-3.34213	-3.75321	-2.41354
ENSG00000155961	116442	RAB39B	-2.77437	Down	-2.5772	-2.46479	-2.84494	-2.82521	-2.80781	-2.69598	-1.95425	-4.26973	-2.95537	-2.52736	-3.00767	-2.36217
ENSG00000155970	286097	MICU3	-5.23394	Down	-5.25831	-4.78431	-5.97033	-6.11518	-5.20714	-4.65597	-4.80988	-3.84264	-6.20157	-6.68809	-2.95661	-6.31725
ENSG00000156011	23362	PSD3	4.89413	Up	4.61299	5.48354	4.96606	4.03138	5.83375	5.98363	5.65872	3.84725	4.71261	4.32311	4.70284	4.57372
ENSG00000156395	22986	SORCS3	-3.37329	Down	-2.92294	-3.63492	-3.51092	-3.44528	-3.50186	-3.38959	-3.46448	-3.63473	-3.44139	-3.25767	-3.36585	-2.90989
ENSG00000156509	286151	FBXO43	2.81063	Up	2.85407	2.85145	3.02871	2.15587	3.23569	2.85574	3.57148	1.98147	3.22699	3.33669	2.27496	2.35446
ENSG00000156510	80201	HKDC1	-3.50427	Down	-3.42721	-3.66022	-3.27801	-3.86901	-3.18834	-3.14417	-3.68079	-3.07457	-3.54295	-3.69294	-3.85586	-3.63717
ENSG00000156535	135228	CD109	5.75384	Up	5.96601	7.01919	6.03544	5.83854	6.33567	6.60487	7.19352	5.33432	4.61884	2.49523	5.683	5.9214
ENSG00000156970	701	BUB1B	3.12899	Up	2.87136	2.87248	2.99293	2.574	3.90375	2.60903	3.1488	3.21985	3.62829	3.79524	2.38848	3.54366
ENSG00000157240	8321	FZD1	3.00633	Up	2.40455	2.90584	2.76875	3.3707	3.74608	3.97141	3.19201	2.6774	2.69288	2.71738	2.80671	2.82221
ENSG00000157456	9133	CCNB2	2.4655	Up	2.25284	2.07948	2.40153	2.0766	3.23855	2.37962	2.97586	1.89147	2.81332	3.06543	2.24465	2.16668
ENSG00000157554	2078	ERG	9.23938	Up	8.427	9.76065	9.40474	8.63077	9.74345	9.67873	10.1081	7.67236	8.29665	8.97224	9.47657	10.7013
ENSG00000157557	2114	ETS2	5.69855	Up	5.83125	5.44474	6.33063	5.26351	5.37049	5.85072	6.13116	5.46566	5.38627	4.21617	5.76841	7.32357
ENSG00000157570	90139	TSPAN18	-3.81791	Down	-3.2598	-3.4681	-3.85081	-4.65761	-3.06319	-3.05813	-4.27823	-4.57305	-4.15428	-3.9425	-3.87849	-3.6307
ENSG00000157657	114991	ZNF618	4.22387	Up	3.38716	3.47288	3.51451	4.269	5.01257	4.81161	3.72029	4.3189	3.7479	5.85748	4.42625	4.14792
ENSG00000157927	55698	RADIL	3.56184	Up	3.35041	2.82313	3.69106	2.88955	2.93266	2.54823	2.67666	2.93487	3.07558	8.13783	3.65244	4.02969
ENSG00000158023	144406	CFAP251	4.38464	Up	3.4247	4.72968	4.17272	5.75115	4.0022	3.9358	5.74705	4.71054	2.88144	4.34831	3.69743	5.21467
ENSG00000158089	79623	GALNT14	5.65293	Up	5.24454	5.73635	6.21276	5.8892	4.85799	5.18556	5.27381	5.22431	5.49036	7.83627	5.11582	5.76813
ENSG00000158321	26053	AUTS2	2.99424	Up	3.06311	2.63182	3.1205	2.12688	3.28173	3.4461	2.72393	2.5645	3.16776	3.80469	2.31964	3.68021
ENSG00000158402	995	CDC25C	3.44647	Up	3.50588	3.15748	3.30766	3.04396	3.95267	3.45822	3.68916	2.91078	3.83467	3.99863	3.06384	3.43468
ENSG00000158411	129531	MITD1	-2.37957	Down	-2.88468	-2.22325	-2.59845	-2.6585	-2.19415	-2.72682	-1.87361	-2.32072	-2.09086	-2.5144	-2.3157	-2.15365
ENSG00000158497	57824	HMHB1	5.50773	Up	5.24742	5.27987	5.80157	5.24551	4.49049	5.17082	6.12134	5.91963	6.01899	6.0381	4.92696	5.83206
ENSG00000158578	212	ALAS2	6.6191	Up	7.37068	4.95373	6.64012	6.55197	7.7564	6.94105	6.94481	6.2109	5.87879	6.19359	7.16501	6.82216
ENSG00000158985	56990	CDC42SE2	-2.47361	Down	-2.28403	-1.50418	-2.63216	-2.80085	-2.6288	-1.82008	-2.19478	-3.33384	-2.4767	-2.49312	-2.55581	-2.95894
ENSG00000159259	8208	CHAF1B	2.381	Up	2.88542	1.50038	1.98518	1.67291	2.69775	2.11051	2.96057	2.0075	2.38095	2.81868	1.55255	3.99964
ENSG00000159445	117145	THEM4	-4.82518	Down	-4.19202	-3.57298	-5.01291	-4.93071	-4.58518	-4.14679	-5.2228	-4.80788	-5.10378	-5.57171	-5.33299	-5.42241
ENSG00000159625	84229	DRC7	2.85475	Up	2.36375	2.72011	3.4658	2.55276	2.70483	2.40658	2.90543	3.37005	3.07688	2.20104	2.52345	3.96631
ENSG00000159648	374739	TEPP	-2.48276	Down	-2.46055	-2.81865	-2.68654	-1.94442	-2.54726	-1.93725	-2.44122	-2.41987	-2.63769	-2.52	-2.55905	-2.82067
ENSG00000159733	57732	ZFYVE28	-3.2228	Down	-2.31847	-3.37467	-3.31879	-1.90957	-3.70794	-2.96218	-3.82651	-3.22646	-3.66526	-3.42893	-3.31859	-3.61617
ENSG00000159788	6002	RGS12	3.25381	Up	3.15706	3.18174	2.99088	2.5069	3.38935	3.66069	3.61008	3.13152	3.23037	4.01065	2.8888	3.28768
ENSG00000160062	653121	ZBTB8A	4.38459	Up	3.03761	5.17094	2.91777	5.96298	5.45346	5.19002	4.56027	3.42122	3.5299	3.52349	6.41888	3.42853
ENSG00000160223	102723996	LOC102723996	3.20235	Up	3.4113	2.64496	3.13705	4.00065	2.57882	3.7211	3.24171	2.98045	2.66172	3.27676	3.55128	3.2224
ENSG00000160298	54058	C21orf58	2.72881	Up	3.22173	1.98235	3.36046	2.52341	3.02808	2.92712	2.94857	1.55316	2.42531	4.0225	2.34519	2.40785
ENSG00000160321	7757	ZNF208	-4.93501	Down	-4.77279	-4.41246	-4.2848	-5.94153	-3.76533	-4.34697	-4.03508	-6.09234	-4.91332	-5.22161	-6.01602	-5.41789
ENSG00000160360	26086	GPSM1	4.90542	Up	5.08377	4.19331	5.24635	6.98155	4.35006	4.22485	4.20938	4.96409	4.01719	5.63662	5.39204	4.56585
ENSG00000160447	29941	PKN3	2.75021	Up	2.82055	2.25858	2.79846	2.88108	2.68254	2.53475	2.23026	3.06062	2.59574	3.65477	2.96956	2.5156
ENSG00000160588	196264	MPZL3	-2.81235	Down	-1.78293	-1.84384	-2.87896	-3.59464	-3.29867	-3.00317	-2.36763	-2.71175	-2.59763	-4.39341	-2.60549	-2.6701
ENSG00000160678	6271	S100A1	5.45121	Up	5.52721	5.4343	6.32923	4.53641	4.54807	5.01003	6.47575	4.20236	6.35133	5.79422	5.20075	6.00484
ENSG00000160683	643	CXCR5	-5.18899	Down	-4.22429	-4.74369	-5.31422	-6.39745	-4.88583	-3.59467	-5.25824	-5.18217	-5.13656	-5.77916	-5.91125	-5.84033
ENSG00000160767	10712	ENTREP3	2.58016	Up	3.13056	1.94745	2.368	2.13603	2.75488	2.89157	2.33061	2.56426	2.67063	2.98535	2.27227	2.91028
ENSG00000160856	115352	FCRL3	-5.09551	Down	-5.18387	-4.7122	-4.6096	-6.32681	-4.61974	-3.93624	-5.34805	-5.02085	-4.91155	-5.06878	-6.211	-5.19745
ENSG00000160949	4796	TONSL	2.29162	Up	2.21384	1.75294	2.81653	2.06888	2.54682	2.2551	2.02582	1.8327	2.2099	3.22876	1.94161	2.60649
ENSG00000160957	9401	RECQL4	2.87048	Up	3.35183	2.22802	3.36579	2.68386	3.08785	2.71986	2.44876	2.43683	3.028	3.80631	2.39662	2.89199
ENSG00000161405	22806	IKZF3	-3.44852	Down	-3.33382	-3.65349	-2.94545	-3.9675	-4.26717	-3.3255	-3.16111	-4.64477	-2.91329	-2.28164	-3.85336	-3.03519
ENSG00000161544	114757	CYGB	6.44261	Up	6.77762	5.7642	8.34032	7.02971	7.77155	7.96971	4.89482	5.24244	7.35373	1.97452	7.24663	6.94606
ENSG00000161638	3678	ITGA5	2.87625	Up	3.61746	3.22359	3.80178	2.53556	2.59183	3.17524	2.32922	1.87796	3.25428	2.9261	2.41921	2.76272
ENSG00000161642	25946	ZNF385A	2.8011	Up	3.00247	2.77765	3.02028	1.97188	2.35389	2.56714	2.20244	3.63573	3.2033	3.86898	2.38896	2.62048
ENSG00000161681	50944	SHANK1	6.22177	Up	5.76421	6.21223	6.09639	6.82866	5.28546	4.62788	4.15934	7.71385	6.30556	9.51246	6.51037	5.64489
ENSG00000161714	113026	PLCD3	2.65119	Up	2.89421	2.22806	2.15469	2.54066	2.12341	2.36973	3.29139	4.73887	1.83929	1.5572	3.80036	2.27643
ENSG00000161860	256126	SYCE2	2.8275	Up	3.20925	2.19607	2.89049	2.35814	3.3936	2.63803	3.20567	2.55076	2.7793	3.49232	1.67849	3.53781
ENSG00000161888	147841	SPC24	3.17861	Up	2.67238	3.2018	3.27946	2.90575	3.55095	3.18855	3.60741	2.26123	3.35284	4.41794	2.91753	2.78746
ENSG00000161996	197335	WDR90	3.64971	Up	4.64424	3.39153	4.68584	3.70345	3.29712	3.45286	2.09396	3.47875	3.42424	4.71464	3.77332	3.13657
ENSG00000162062	80178	TEDC2	3.67959	Up	3.90365	3.18023	3.994	3.32767	3.75393	3.86838	3.32376	3.23246	3.87196	5.04306	3.11403	3.54192
ENSG00000162337	4041	LRP5	4.55121	Up	4.37053	4.35814	4.89912	4.13803	4.18832	4.9263	4.07122	4.93179	4.14838	5.77486	3.92237	4.88546
ENSG00000162367	6886	TAL1	4.15319	Up	4.05334	3.41307	4.38341	3.90227	4.98112	4.02166	4.68154	3.55946	3.76638	4.02525	5.00461	4.04619
ENSG00000162415	57643	ZSWIM5	-2.92734	Down	-2.65383	-3.54574	-2.96581	-3.24063	-1.77077	-2.36268	-4.20574	-2.53829	-2.88696	-2.91455	-3.14806	-2.89504
ENSG00000162522	57648	KIAA1522	2.99676	Up	2.96618	3.41845	2.47451	2.32767	2.91658	2.89681	1.92626	3.28319	2.04656	3.70127	5.14591	2.85775
ENSG00000162545	55450	CAMK2N1	-3.01383	Down	-2.18473	-3.99662	-3.52169	-1.7016	-3.21117	-3.46048	-2.39031	-3.48069	-3.20242	-2.96517	-3.20639	-2.84469
ENSG00000162620	127255	LRRIQ3	-3.00409	Down	-3.85788	-2.7793	-2.53354	-2.29556	-3.26866	-3.48225	-2.74535	-3.13282	-2.58911	-3.48779	-3.02744	-2.84941
ENSG00000162641	254268	AKNAD1	3.98123	Up	3.51918	3.7756	4.63382	3.40658	3.903	3.83791	5.05275	2.39876	4.16696	3.95761	3.59913	5.52342
ENSG00000162676	2672	GFI1	2.51707	Up	2.59274	2.50855	3.106	2.10902	2.96938	3.01066	2.23955	2.18586	2.23685	3.01101	2.06666	2.16859
ENSG00000162688	178	AGL	-2.5223	Down	-2.76626	-1.90107	-2.65999	-2.05148	-2.4287	-3.35768	-3.5487	-1.53252	-1.81938	-2.62649	-2.64528	-2.93009
ENSG00000162739	114836	SLAMF6	-5.32186	Down	-5.82615	-4.5106	-5.4839	-5.76186	-5.31366	-4.71601	-5.9612	-4.52832	-4.74639	-4.95741	-5.73555	-6.3213
ENSG00000162772	467	ATF3	3.8334	Up	3.00436	3.43617	4.28013	5.86448	3.31791	2.61607	3.85953	3.93898	3.48307	3.31819	5.86578	3.01618
ENSG00000162777	79961	DENND2D	-2.07745	Down	-1.97664	-2.18956	-1.51734	-3.35634	-1.98213	-1.5638	-2.15918	-2.33204	-1.53597	-2.05563	-2.70799	-1.55276
ENSG00000162894	9214	FCMR	-2.90468	Down	-2.60934	-2.36958	-2.7041	-3.97068	-2.37846	-2.37657	-2.63355	-2.9196	-2.44419	-3.32	-4.25557	-2.8745
ENSG00000163082	130367	SGPP2	-4.44893	Down	-4.12771	-5.29276	-4.31449	-4.83988	-3.99565	-2.97092	-4.80996	-4.78293	-3.99476	-4.23251	-4.89018	-5.13538
ENSG00000163110	10611	PDLIM5	-3.0765	Down	-3.17579	-2.01366	-3.02575	-2.97473	-2.61065	-3.07092	-3.69002	-2.19895	-3.4475	-3.35511	-3.70999	-3.64488
ENSG00000163132	4487	MSX1	4.07676	Up	3.87658	3.57519	3.68459	5.37468	4.53443	4.26317	4.33159	3.10537	4.25716	3.83244	4.3613	3.72458
ENSG00000163273	4880	NPPC	4.20229	Up	3.92761	3.22425	3.84245	6.39603	2.59817	2.80333	4.40651	3.28313	4.93235	6.84495	4.06085	4.10783
ENSG00000163449	92691	TMEM169	-4.22983	Down	-4.47527	-4.56881	-4.16185	-4.87005	-2.66248	-2.85942	-4.02414	-4.20922	-4.59304	-4.6717	-4.97727	-4.68468
ENSG00000163453	3490	IGFBP7	5.57229	Up	5.61318	6.30937	6.26245	4.60796	3.77414	2.38201	5.06888	7.37189	6.81474	7.24306	5.47908	5.94073
ENSG00000163554	6708	SPTA1	8.36083	Up	8.02065	7.87596	8.63544	8.44253	9.76955	8.71396	8.41024	6.97206	7.96165	7.2273	8.46798	9.83261
ENSG00000163568	9447	AIM2	-5.36612	Down	-5.24224	-5.10835	-5.85627	-5.76778	-5.0004	-4.9467	-3.2665	-6.03361	-5.24372	-6.86249	-5.91228	-5.15305
ENSG00000163625	23001	WDFY3	4.74215	Up	4.31945	4.6391	4.66889	4.25972	6.79759	6.55498	6.46695	3.26564	2.77866	2.01769	4.97371	6.16346
ENSG00000163702	84818	IL17RC	4.66883	Up	5.39849	5.25166	5.6675	4.32125	3.66871	4.81362	4.26783	3.09694	4.89607	4.27161	5.29532	5.07693
ENSG00000163808	56992	KIF15	2.39547	Up	1.84184	1.98976	2.21136	2.23738	3.01109	2.02346	2.86555	1.79743	2.83616	3.34786	2.14137	2.44243
ENSG00000163975	4241	MELTF	3.9053	Up	3.85722	2.90067	3.39431	2.96682	1.92344	3.62648	3.54667	4.47532	3.87596	7.49122	4.41078	4.39476
ENSG00000164045	993	CDC25A	4.65196	Up	4.93666	4.0407	4.43171	4.65225	5.1581	4.6315	4.80076	3.68513	5.12494	5.46309	4.51237	4.38637
ENSG00000164050	5364	PLXNB1	6.03339	Up	6.28406	3.6501	5.92108	6.69747	6.24172	5.64623	5.12493	6.35396	5.8771	8.34042	5.96575	6.29791
ENSG00000164087	25886	POC1A	2.57602	Up	2.70431	1.90847	2.74108	2.2824	2.70322	2.74433	2.47576	2.40176	2.95704	3.31385	2.16907	2.51094
ENSG00000164114	79884	MAP9	-4.17265	Down	-3.77591	-4.26811	-4.6479	-3.51783	-4.08589	-4.12571	-4.2872	-3.25729	-3.88861	-4.71421	-4.87795	-4.62521
ENSG00000164116	2982	GUCY1A1	5.76771	Up	5.11188	6.45628	6.61984	5.89369	6.08429	6.13125	5.19359	6.67308	5.82261	3.69173	6.43725	5.09697
ENSG00000164161	64399	HHIP	5.97497	Up	4.58294	7.00456	8.3146	8.01413	7.60847	6.81694	3.28133	4.61803	4.25261	6.39488	5.15767	5.65346
ENSG00000164172	4338	MOCS2	-2.55591	Down	-2.51226	-1.67609	-3.04678	-2.05486	-2.37501	-2.60431	-2.28303	-2.3805	-1.9115	-4.7756	-3.29439	-1.75665
ENSG00000164237	134147	CMBL	4.78701	Up	4.09658	5.21223	4.44924	5.15739	4.343	3.9635	6.01015	4.83823	5.34698	3.89183	4.95623	5.17877
ENSG00000164241	401207	C5orf63	-2.64748	Down	-2.99239	-2.65253	-2.78655	-2.4722	-2.76672	-2.7104	-3.72017	-1.82384	-2.20326	-2.32709	-3.05797	-2.25671
ENSG00000164330	1879	EBF1	4.08559	Up	3.80403	3.71862	4.2067	3.70286	4.18901	4.16042	3.98751	3.2375	4.44574	5.4244	3.33693	4.81331
ENSG00000164362	7015	TERT	4.67574	Up	5.22308	3.49861	5.4804	4.38665	1.87416	3.66116	4.27885	5.32852	5.1341	7.26316	5.07023	4.91
ENSG00000164483	154075	SAMD3	-3.8048	Down	-3.44266	-3.37412	-3.91743	-4.88235	-3.49417	-3.16826	-3.80259	-3.93508	-3.56704	-4.05076	-4.24211	-3.78107
ENSG00000164506	134957	STXBP5	-3.17761	Down	-3.31322	-3.41799	-4.08005	-3.70597	-1.72518	-2.84435	-2.00005	-2.00632	-4.23339	-2.96828	-3.64535	-4.19118
ENSG00000164512	79722	ANKRD55	-3.59196	Down	-3.64274	-3.60814	-3.45676	-4.64434	-2.79347	-2.65565	-3.7014	-2.83072	-3.23201	-4.45293	-4.0949	-3.99043
ENSG00000164535	221955	DAGLB	3.15162	Up	3.57344	2.78799	3.51587	2.7009	3.44398	3.42199	2.98179	2.19129	3.73741	2.82691	3.56363	3.07426
ENSG00000164543	9263	STK17A	-2.7024	Down	-1.93718	-2.89925	-2.98993	-2.75018	-3.01049	-2.70488	-2.24131	-3.02835	-2.06242	-3.64244	-2.86626	-2.29606
ENSG00000164574	55568	GALNT10	-1.9538	Down	-1.71043	-1.74394	-1.68827	-2.1654	-2.46539	-1.95761	-2.58602	-1.93836	-1.64774	-1.71647	-2.04717	-1.77885
ENSG00000164684	619279	ZNF704	6.96065	Up	6.50592	7.08441	6.28285	7.58444	7.56269	7.3434	7.84771	4.95885	6.94298	8.05305	6.35703	7.00443
ENSG00000164741	10395	DLC1	3.62745	Up	3.4601	5.8019	3.30987	2.88499	5.28072	3.17253	3.37256	3.00948	2.87738	2.66128	2.68604	5.01257
ENSG00000164877	79778	MICALL2	2.67004	Up	3.1842	2.61929	3.45909	2.79847	2.12909	2.20003	1.88499	2.25988	2.69342	2.93862	3.22446	2.6489
ENSG00000164929	79870	BAALC	6.67501	Up	6.54128	9.76382	8.14822	5.85046	6.45809	6.72247	7.21569	7.90966	7.59403	1.94545	5.69504	6.25588
ENSG00000165272	360	AQP3	-3.64568	Down	-2.64025	-3.67417	-3.80281	-3.82546	-3.2358	-2.92854	-4.03918	-3.96009	-3.81329	-4.28107	-3.70049	-3.84696
ENSG00000165304	9833	MELK	2.54907	Up	2.20265	2.31779	2.30843	2.06689	3.20563	2.51185	3.2411	2.34484	2.54812	3.15644	2.3137	2.37144
ENSG00000165480	221150	SKA3	2.27209	Up	2.00435	1.93862	1.61753	1.92206	2.48127	2.14961	3.09307	1.75965	2.96314	2.74009	2.04125	2.55446
ENSG00000165507	11067	DEPP1	7.39305	Up	7.10426	7.92808	7.46601	8.60054	6.5184	8.06745	8.10494	3.96546	7.62151	9.76481	6.96328	6.61182
ENSG00000165521	161436	EML5	-4.88307	Down	-4.33661	-5.54042	-5.33954	-4.58019	-3.82782	-4.54914	-4.93636	-5.07531	-5.12287	-5.59467	-5.18429	-4.50966
ENSG00000165702	8328	GFI1B	3.58286	Up	4.24451	2.2147	3.64925	3.60046	3.97591	3.05139	3.03448	4.14951	3.23996	3.4544	5.08872	3.29101
ENSG00000165716	138311	DIPK1B	5.82018	Up	6.11025	6.03203	6.09417	7.26209	6.55623	6.77475	5.33857	5.00203	4.44179	5.05078	6.27157	4.90791
ENSG00000165757	57608	JCAD	6.30498	Up	5.59266	8.19966	5.33066	4.77007	6.30034	8.39768	9.32431	5.38547	5.0122	2.63845	6.89808	7.81017
ENSG00000165801	55701	ARHGEF40	2.81285	Up	1.9423	2.86342	3.02245	3.86029	2.50898	2.53766	1.92545	3.85227	2.7237	3.15216	3.19343	2.17214
ENSG00000165868	259217	HSPA12A	-3.85813	Down	-3.59931	-4.49278	-3.66164	-2.66185	-3.82118	-3.86449	-3.95018	-4.33497	-4.12051	-3.67216	-4.03826	-4.0802
ENSG00000165874	414241	SHLD2P1	-2.97189	Down	-4.79741	-2.82728	-3.38722	-2.35902	-2.96202	-3.80997	-2.21203	-2.18701	-2.12982	-3.77983	-3.12905	-2.08205
ENSG00000165891	144455	E2F7	3.84909	Up	3.68166	3.62243	3.75956	3.36424	3.93582	2.70149	4.39993	4.28999	4.62412	5.2738	3.26516	3.27081
ENSG00000165912	29763	PACSIN3	4.13541	Up	4.57754	3.87346	3.71023	4.1229	3.74389	3.3086	4.7548	2.95326	5.50519	5.98138	3.20041	3.89322
ENSG00000165914	145567	TTC7B	3.83265	Up	3.46555	4.00531	2.48304	4.72197	3.12255	3.5091	5.02456	3.87462	3.05477	3.69364	5.26262	3.7741
ENSG00000165929	123036	TC2N	-3.9067	Down	-3.3835	-3.05864	-3.92902	-5.36081	-2.81339	-2.13888	-4.18881	-4.70008	-4.33643	-4.91846	-4.69929	-3.35305
ENSG00000165996	9200	HACD1	4.79984	Up	4.05807	5.62079	4.89096	4.44773	5.47092	5.1002	5.78819	3.41086	4.44063	4.14709	5.59265	4.62995
ENSG00000166016	25841	ABTB2	2.9406	Up	3.58059	2.29513	2.75606	4.16026	1.88301	2.24977	1.77385	4.5613	2.50372	3.37504	4.3096	1.83889
ENSG00000166025	154810	AMOTL1	5.48514	Up	4.28281	6.2592	4.90307	6.54791	4.61796	4.25428	5.08969	6.29378	5.88211	7.14647	4.77118	5.77322
ENSG00000166035	3990	LIPC	3.0102	Up	2.40226	3.18944	2.73932	3.05159	2.63102	2.55968	1.76998	5.43789	2.41566	3.78569	4.148	1.99188
ENSG00000166073	11245	GPR176	6.3208	Up	8.18802	6.40938	7.14765	7.90621	4.50814	6.18218	3.26594	5.13331	9.50385	10.5009	4.67854	2.42545
ENSG00000166086	83700	JAM3	-4.22536	Down	-3.12071	-4.57647	-4.95882	-3.81936	-3.30941	-3.26456	-4.79598	-4.16254	-4.83098	-4.65739	-4.91113	-4.29698
ENSG00000166262	196951	FAM227B	-2.45221	Down	-2.57891	-2.5068	-2.51418	-2.23474	-2.60379	-2.45083	-1.91922	-2.47464	-2.55908	-2.96517	-2.50746	-2.11165
ENSG00000166349	5896	RAG1	7.65618	Up	7.81374	8.18537	8.57452	7.14242	10.2764	10.2021	6.6239	4.25058	7.86286	7.36119	5.46047	8.12067
ENSG00000166387	8495	PPFIBP2	-3.19268	Down	-2.50878	-3.93776	-4.21286	-2.86793	-1.78192	-2.76837	-3.52726	-2.15383	-2.52371	-4.09605	-4.34913	-3.58455
ENSG00000166405	79608	RIC3	-5.00952	Down	-3.67378	-5.99908	-5.28403	-5.14184	-4.30724	-4.70213	-3.92123	-5.30207	-5.25497	-5.82386	-5.76485	-4.93914
ENSG00000166508	4176	MCM7	2.13284	Up	2.49583	1.65288	2.34177	2.0309	2.5644	2.07724	1.72647	1.7779	2.30006	2.96287	1.80712	1.8566
ENSG00000166562	90701	SEC11C	-3.53288	Down	-3.758	-2.88505	-3.66209	-2.87091	-2.91585	-3.10022	-4.30638	-3.84412	-2.98109	-3.00706	-5.1569	-3.90685
ENSG00000166707	644353	ZCCHC18	-3.4463	Down	-2.99495	-3.74637	-4.33768	-3.35267	-3.50579	-4.04716	-2.69589	-2.58106	-3.66071	-2.53887	-3.99398	-3.90052
ENSG00000166803	9768	PCLAF	3.75932	Up	3.57687	3.55496	3.79776	3.85822	3.94861	3.77787	4.011	2.89749	4.00233	4.28198	4.23103	3.17377
ENSG00000166813	374654	KIF7	4.13048	Up	4.46629	4.06272	3.04507	5.56383	3.31799	3.7049	3.72888	4.25332	3.44462	5.64995	2.52283	5.80532
ENSG00000166851	5347	PLK1	2.64891	Up	2.56636	2.14072	2.57691	2.60202	3.19503	2.29609	2.59161	2.65519	2.97291	3.64679	2.43175	2.11156
ENSG00000166908	79837	PIP4K2C	-3.61532	Down	-2.84545	-3.34065	-4.00998	-4.11806	-3.3895	-3.44343	-4.39989	-4.20011	-3.07815	-2.63715	-4.15078	-3.77071
ENSG00000166947	2038	EPB42	5.97151	Up	6.67765	4.11172	6.19723	5.39635	7.1798	5.80126	6.12338	5.77828	5.43405	5.80679	6.59746	6.55411
ENSG00000166963	4130	MAP1A	4.5645	Up	3.74105	4.66941	5.75426	4.39119	4.74277	3.48736	3.55496	5.67079	3.3811	6.98118	3.83879	4.5611
ENSG00000167037	129049	SGSM1	-2.89125	Down	-3.05613	-3.50675	-3.09295	-2.02208	-1.93243	-2.20858	-3.17515	-3.35605	-3.72198	-2.93946	-3.08792	-2.59549
ENSG00000167123	51148	CERCAM	4.07398	Up	4.60904	3.06501	4.25253	3.26114	3.11652	3.9141	3.59288	4.42156	4.48103	5.80919	3.66202	4.70276
ENSG00000167291	125058	TBC1D16	3.94918	Up	3.9028	3.12872	3.96004	4.35779	3.68342	4.45326	4.98227	3.1506	3.78464	2.69587	5.56825	3.72244
ENSG00000167513	81620	CDT1	5.51412	Up	6.68573	4.61289	5.74837	5.32031	5.67951	5.93656	4.30985	4.83273	5.77689	6.96531	5.4574	4.8439
ENSG00000167535	784	CACNB3	3.97984	Up	3.97629	3.38025	4.65937	3.74476	3.98194	3.90079	3.34113	3.90393	4.19578	4.7404	3.83798	4.0955
ENSG00000167549	84940	CORO6	4.10498	Up	5.21794	4.24346	4.41511	3.02548	3.55452	4.5813	3.71923	2.81647	4.41002	4.39618	4.56721	4.3128
ENSG00000167705	83547	RILP	3.55451	Up	4.18822	2.64015	3.80461	3.62597	3.0077	3.29159	3.80364	3.28179	3.49904	3.66482	4.57989	3.26667
ENSG00000167889	146664	MGAT5B	5.30725	Up	5.12284	3.65951	5.05605	7.18315	5.00257	5.77236	3.82201	6.78733	4.67347	7.92002	5.10964	3.57808
ENSG00000167900	7083	TK1	3.37625	Up	3.65624	3.07541	3.67334	2.8726	3.48486	3.83134	3.94372	2.63151	3.64483	3.52967	3.21594	2.95553
ENSG00000167992	220001	VWCE	5.57629	Up	6.17454	5.00036	5.65498	5.98401	5.65168	4.89491	5.0233	4.92809	5.19435	7.67551	5.38097	5.35283
ENSG00000167994	5866	RAB3IL1	3.5049	Up	3.48003	2.07688	3.08295	3.31336	5.69865	4.87717	3.40088	2.44191	2.34052	3.92458	4.14999	3.2719
ENSG00000168268	64943	NT5DC2	3.42428	Up	3.60679	2.94523	3.65303	2.92466	3.49822	2.83592	3.03552	3.59087	3.67511	4.1523	3.00786	4.1659
ENSG00000168280	3800	KIF5C	-5.1785	Down	-4.88835	-4.93262	-5.60981	-5.58433	-5.26527	-5.11201	-5.79235	-5.8166	-5.58949	-3.21959	-5.4453	-4.88627
ENSG00000168334	165904	XIRP1	6.59322	Up	7.35335	5.0447	7.2328	6.00556	7.35838	6.37632	7.67394	6.24877	5.9628	6.00423	7.34957	6.5082
ENSG00000168487	649	BMP1	2.1269	Up	2.24609	1.78798	2.61311	2.49383	1.58152	1.63586	1.71368	2.47875	1.58718	2.45424	2.71452	2.21609
ENSG00000168491	256309	CCDC110	-3.48032	Down	-3.13974	-3.55359	-3.20572	-3.58536	-3.33974	-3.29202	-3.69243	-3.80007	-3.46764	-3.47825	-3.73937	-3.46996
ENSG00000168528	347735	SERINC2	5.03499	Up	5.33184	3.84209	5.16398	7.86889	2.30078	4.011	4.10081	7.15609	4.8157	7.4938	3.77377	4.56114
ENSG00000168671	167127	UGT3A2	6.83937	Up	5.84709	6.64231	6.05241	6.19013	8.00416	7.90664	8.53096	7.93669	6.0606	7.33201	5.87143	5.69796
ENSG00000168876	54851	ANKRD49	-1.81223	Down	-1.56287	-2.0132	-2.03338	-1.90501	-1.78163	-1.57734	-1.50358	-1.68725	-1.84063	-2.26356	-2.04885	-1.52944
ENSG00000168944	153241	CEP120	-2.13065	Down	-2.15258	-2.08395	-2.23786	-2.30948	-2.01998	-2.0799	-1.65469	-2.25218	-2.0925	-2.37962	-2.43822	-1.86679
ENSG00000168961	3965	LGALS9	2.45696	Up	2.95187	1.94391	2.42739	2.69034	2.45956	2.39661	1.70874	2.76214	2.90256	2.75137	2.52039	1.96869
ENSG00000169184	4330	MN1	5.81028	Up	4.68683	5.33081	5.76275	7.77275	7.07832	6.52426	7.02091	6.256	3.08122	3.16989	7.81615	5.22347
ENSG00000169258	114787	GPRIN1	3.84161	Up	4.49372	2.97137	3.69161	2.63388	4.14481	4.3984	3.59435	3.92458	3.7358	5.47555	3.57401	3.46119
ENSG00000169418	4881	NPR1	8.2037	Up	7.87561	8.53417	9.31446	7.5711	9.6349	10.0051	9.46839	6.09204	8.27739	4.18875	8.45247	9.03004
ENSG00000169435	166824	RASSF6	-4.56339	Down	-4.40758	-5.19118	-5.26698	-4.13023	-3.55506	-2.34142	-5.34905	-5.37321	-5.6158	-5.78014	-4.00193	-3.74817
ENSG00000169439	6383	SDC2	6.78455	Up	4.60876	6.04152	4.88048	7.61262	9.28556	9.08753	7.0225	7.36256	4.28931	7.83232	7.15552	6.23593
ENSG00000169507	151258	SLC38A11	-3.96259	Down	-3.9359	-3.91775	-3.87625	-3.47523	-3.85944	-3.95925	-4.19393	-4.07021	-4.26193	-4.29586	-4.07438	-3.63093
ENSG00000169508	1880	GPR183	-4.86765	Down	-4.6218	-4.20404	-5.59389	-6.01122	-5.66399	-4.79935	-4.7865	-2.69968	-5.39341	-6.74546	-1.51038	-6.38207
ENSG00000169570	285605	DTWD2	-2.86137	Down	-3.00603	-2.49037	-3.12877	-3.12482	-3.36712	-3.18566	-2.57912	-2.86445	-2.57958	-3.17728	-2.28984	-2.54344
ENSG00000169575	7441	VPREB1	7.81647	Up	8.82376	8.51558	7.20738	6.56852	5.39077	8.47468	9.21824	6.46603	9.12563	8.97728	6.61645	8.41328
ENSG00000169607	150468	CKAP2L	3.81006	Up	3.36404	3.72113	3.48624	3.23922	4.63582	3.88226	4.53761	3.09023	4.09368	4.75671	2.98087	3.9329
ENSG00000169710	2194	FASN	3.21532	Up	4.36873	2.4075	3.90549	3.46945	2.06057	2.81676	2.11518	3.26318	3.45003	3.99158	4.11785	2.61748
ENSG00000169750	5881	RAC3	3.51931	Up	4.29369	2.84895	3.54736	3.01251	2.68714	3.29622	2.98577	3.43862	3.59315	4.47214	4.08662	3.9695
ENSG00000169877	51327	AHSP	7.00692	Up	7.67956	5.22011	7.05223	6.62779	8.14229	6.90708	6.95823	6.42539	6.54517	7.61731	7.81997	7.08786
ENSG00000170180	2993	GYPA	6.42494	Up	5.98168	4.67889	6.52965	6.01468	7.80829	6.09022	7.51337	5.8136	5.91354	6.013	7.28725	7.45512
ENSG00000170271	10826	FAXDC2	3.31511	Up	4.00647	2.49062	3.62845	3.9087	3.64237	2.931	3.49927	2.22955	3.24953	3.03548	3.61088	3.54894
ENSG00000170365	4086	SMAD1	5.98902	Up	5.46031	6.85865	6.36939	7.8702	8.23889	8.01601	6.34608	2.73005	2.67912	4.98195	6.19614	6.12149
ENSG00000170412	55890	GPRC5C	4.62635	Up	4.90522	4.78267	4.55664	5.76653	3.25508	4.67999	5.5123	4.22972	4.50493	3.35117	6.05177	3.9202
ENSG00000170482	9963	SLC23A1	4.16687	Up	4.33931	4.05523	4.86453	3.73026	4.23158	3.97072	3.5445	4.41683	4.58373	4.83689	3.17892	4.24997
ENSG00000170677	9306	SOCS6	2.74646	Up	2.4984	2.4856	2.19266	3.04823	2.47027	2.70489	3.82749	2.59717	2.68172	2.26742	3.29412	2.8895
ENSG00000170786	195814	SDR16C5	-2.85948	Down	-2.59708	-2.77121	-2.79241	-2.92142	-2.76733	-2.83275	-2.9214	-2.9481	-2.94829	-2.91715	-2.94829	-2.94829
ENSG00000170801	94031	HTRA3	5.15026	Up	4.1823	5.61129	4.94203	2.77472	2.00755	4.43673	3.86698	7.21649	5.09727	10.3991	7.65653	3.61221
ENSG00000170835	1056	CEL	3.7092	Up	4.92232	3.30077	4.74878	2.23172	3.84581	3.42233	2.30393	4.16385	4.48796	3.22709	2.74146	5.11437
ENSG00000170891	54360	CYTL1	5.92073	Up	5.88495	7.49613	6.83976	5.0676	5.68387	5.55319	8.0255	3.00689	7.07011	2.77874	5.70419	7.93778
ENSG00000170893	7200	TRH	5.60769	Up	6.17916	4.51023	4.14865	4.77351	6.21758	6.49446	5.6907	6.59827	6.52745	4.89138	5.58497	5.6759
ENSG00000170946	120526	DNAJC24	-2.49973	Down	-2.87165	-2.12744	-2.67707	-1.9515	-3.45158	-3.06652	-2.33512	-2.16114	-2.10071	-2.61263	-2.08713	-2.55429
ENSG00000171033	5569	PKIA	-4.4276	Down	-5.30512	-4.9243	-6.08071	-3.03485	-2.64586	-3.78764	-5.61209	-3.80469	-4.1054	-2.04781	-5.90559	-5.87718
ENSG00000171105	3643	INSR	5.81331	Up	5.76887	5.16952	5.76636	5.20743	6.76828	7.03908	5.09791	6.3769	6.0037	5.69885	5.16656	5.6963
ENSG00000171241	79801	SHCBP1	2.26162	Up	1.89537	2.05962	2.03624	1.66063	3.19024	2.40217	2.94089	1.86604	2.56512	2.40507	2.00004	2.11805
ENSG00000171806	92342	METTL18	-2.67435	Down	-2.57841	-2.55853	-3.194	-3.07232	-2.63798	-2.51321	-1.83338	-2.905	-2.29992	-2.87702	-3.09055	-2.5319
ENSG00000171817	163255	ZNF540	-2.23684	Down	-1.974	-3.51185	-2.506	-2.52004	-1.91487	-1.77966	-1.92662	-2.23725	-2.31418	-2.64531	-1.98654	-1.52575
ENSG00000171848	6241	RRM2	2.50581	Up	2.22037	2.30403	2.72632	2.0744	2.82427	2.11835	2.46307	2.34029	2.9658	3.67529	2.32089	2.03662
ENSG00000172037	3913	LAMB2	3.81537	Up	3.35868	5.65796	4.90238	4.31953	2.5604	3.59364	3.75384	2.94271	3.53458	3.35506	5.15586	2.64974
ENSG00000172232	566	AZU1	5.3732	Up	5.26723	6.78794	6.27295	5.51305	4.75353	4.09321	4.7374	5.29681	4.71729	6.53603	6.34869	4.15422
ENSG00000172247	114900	C1QTNF4	5.4236	Up	7.24266	5.64415	6.30997	2.69203	5.18037	5.00612	4.97049	6.24081	5.50413	6.04	5.591	4.66148
ENSG00000172260	257194	NEGR1	5.45992	Up	4.11607	4.49203	4.91409	3.36003	7.48755	8.80604	7.72862	7.61795	4.25561	3.07219	4.03633	5.63255
ENSG00000172340	8801	SUCLG2	-3.05508	Down	-3.42466	-2.22681	-3.48428	-3.40048	-2.46752	-2.39985	-3.1701	-2.83936	-2.29619	-2.60413	-5.30015	-3.04744
ENSG00000172575	10125	RASGRP1	-2.77394	Down	-2.35648	-3.77803	-3.26367	-3.04359	-2.28481	-2.5603	-3.20198	-2.31151	-2.59346	-1.6492	-3.29925	-2.94504
ENSG00000172738	221468	TMEM217	4.82114	Up	5.42242	5.73034	6.29941	3.29407	4.48094	4.9441	5.48649	4.26557	4.88335	3.33329	4.14798	5.56575
ENSG00000172889	51162	EGFL7	7.79873	Up	7.68793	9.0661	8.55571	9.5753	8.5469	9.67332	7.16572	6.18216	6.78069	4.74784	9.63895	5.96411
ENSG00000173208	225	ABCD2	-4.22625	Down	-3.25028	-3.61044	-2.85933	-6.20268	-4.02325	-4.29667	-4.53819	-4.56959	-2.91934	-5.05271	-5.28134	-4.11113
ENSG00000173258	158399	ZNF483	-4.61252	Down	-3.68452	-4.80437	-4.88301	-5.14553	-4.34486	-4.37243	-4.43487	-5.57969	-4.90893	-3.7439	-4.83058	-4.61753
ENSG00000173369	713	C1QB	3.23355	Up	3.28477	3.29283	3.49264	3.10754	3.19708	1.99142	3.1816	2.85849	2.98639	4.40738	3.43956	3.56292
ENSG00000173372	712	C1QA	2.69755	Up	3.30955	3.17465	3.23351	2.6604	2.18097	1.84334	1.80982	2.59643	2.45718	3.36686	2.89309	2.84477
ENSG00000173585	10803	CCR9	-5.10628	Down	-4.3766	-5.46385	-5.53419	-5.70733	-4.33551	-3.8219	-5.25444	-5.12157	-4.8273	-5.66007	-5.53882	-5.63375
ENSG00000173801	3728	JUP	6.62885	Up	7.07307	6.12526	6.89606	6.39335	6.91514	7.3713	6.01952	5.81674	6.80881	7.36905	6.51873	6.23914
ENSG00000173805	9001	HAP1	4.81236	Up	4.42164	2.54537	4.56126	3.82239	10.012	9.20777	3.33418	1.73314	4.97589	4.0812	3.93101	5.12248
ENSG00000173894	84733	CBX2	7.35713	Up	7.51319	6.50184	7.20234	7.48713	8.51449	8.43246	6.37265	6.79501	7.15777	7.49314	7.43426	7.38129
ENSG00000173917	3212	HOXB2	-3.48422	Down	-2.83797	-3.62391	-2.97069	-3.69144	-3.3773	-3.14896	-3.86393	-3.33307	-3.15719	-3.32803	-4.25367	-4.22441
ENSG00000174059	947	CD34	8.82968	Up	7.78508	11.1239	9.80111	11.8046	8.41439	7.1995	9.76527	9.20647	8.18355	4.24306	11.1531	7.27626
ENSG00000174099	253827	MSRB3	3.14468	Up	2.39871	4.92068	2.97611	2.25343	3.06065	3.05296	3.0337	5.05674	2.78232	3.07571	2.88879	2.23637
ENSG00000174233	112	ADCY6	7.5405	Up	7.26249	7.66306	8.34087	6.72579	7.10367	7.20783	7.47854	7.66514	7.4296	7.11544	8.67744	7.81608
ENSG00000174255	7634	ZNF80	-3.08362	Down	-3.26727	-3.00815	-3.59125	-2.59175	-2.78064	-2.78275	-3.25057	-3.50449	-3.20405	-2.90906	-3.19702	-2.91642
ENSG00000174371	9156	EXO1	2.64491	Up	2.54746	2.07451	2.15261	2.38304	3.09182	1.92011	3.09233	2.14897	3.04549	4.02467	2.35682	2.90111
ENSG00000174705	285590	SH3PXD2B	3.25989	Up	2.76016	3.32347	2.95202	3.11666	3.36985	3.11193	3.89195	5.81808	2.97482	1.68254	2.32087	3.79629
ENSG00000175063	11065	UBE2C	2.86502	Up	2.55567	2.52804	2.46785	2.92595	3.4831	2.53469	2.89023	2.78052	3.29864	4.03809	2.74974	2.12776
ENSG00000175097	5897	RAG2	8.41836	Up	7.37482	9.04152	9.05519	8.94029	9.05987	9.34532	5.64553	6.80001	9.46251	10.0588	8.61347	7.62296
ENSG00000175183	1466	CSRP2	6.60862	Up	5.15554	7.74183	6.74476	6.28727	7.0437	6.87316	7.64812	7.6011	6.23788	6.0763	5.25072	6.64301
ENSG00000175305	9134	CCNE2	2.27555	Up	2.21416	2.2962	2.01418	1.58136	2.26411	1.871	2.90138	1.99922	2.74527	2.16615	2.54106	2.71254
ENSG00000175592	8061	FOSL1	4.37508	Up	4.24421	3.45926	4.016	5.54194	3.80698	2.56321	4.65638	4.42153	4.46654	5.1144	6.34838	3.86216
ENSG00000175600	79783	SUGCT	-3.22759	Down	-2.72005	-4.31442	-4.18033	-3.02304	-1.67715	-2.69492	-3.06604	-3.45844	-4.15642	-2.93019	-3.77128	-2.73886
ENSG00000175711	124907948	LOC124907948	2.51241	Up	2.77167	2.98757	3.58594	1.6301	2.21042	2.23894	2.55203	2.08474	2.78195	1.93856	2.61004	2.75691
ENSG00000175727	22877	MLXIP	3.39446	Up	3.37135	2.92109	3.90143	3.79155	3.77534	3.8638	2.69582	2.83071	3.19472	4.05808	2.47035	3.85924
ENSG00000175984	163259	DENND2C	-3.29816	Down	-2.93502	-4.01534	-4.34715	-2.2196	-2.17611	-2.908	-3.0397	-2.82029	-3.78993	-4.05524	-4.00433	-3.2672
ENSG00000176170	8877	SPHK1	3.82418	Up	4.21923	3.46846	4.39135	5.30632	3.41134	3.09943	3.82027	2.88654	3.865	2.28805	6.70804	2.4261
ENSG00000176261	339487	ZBTB8OS	-1.75156	Down	-2.2358	-1.55139	-2.06941	-1.70509	-1.75903	-1.65989	-1.60743	-1.91832	-1.51566	-1.60106	-1.57018	-1.82543
ENSG00000176273	159371	SLC35G1	-3.97845	Down	-4.04697	-4.59845	-4.28477	-3.96245	-4.11754	-3.52857	-4.32797	-2.50932	-3.98871	-3.63981	-4.18167	-4.55514
ENSG00000176435	161198	CLEC14A	8.23096	Up	8.23082	9.22918	8.71324	9.18882	6.11759	8.34825	8.77349	7.3542	6.33816	9.67791	8.09774	8.7021
ENSG00000176485	11145	PLAAT3	-3.43892	Down	-3.25804	-3.17977	-3.55916	-3.87061	-3.13754	-3.03742	-3.72985	-3.47997	-3.3837	-3.19268	-3.38939	-4.04895
ENSG00000176597	84002	B3GNT5	5.0459	Up	4.54598	4.57265	5.54323	3.41992	5.99129	6.04774	5.60721	4.948	4.43388	3.62975	6.99784	4.81332
ENSG00000176658	4642	MYO1D	-3.34859	Down	-3.0342	-4.42469	-3.54443	-2.37733	-2.95571	-2.97302	-3.46648	-3.56767	-3.87165	-2.88395	-3.57797	-3.50592
ENSG00000176834	54621	VSIG10	5.86661	Up	5.13536	6.43844	7.0187	4.69881	5.75134	5.63555	6.05715	4.56457	5.87415	6.42706	6.68567	6.11251
ENSG00000176890	7298	TYMS	4.4759	Up	4.26065	4.41433	4.35522	4.07192	4.99428	4.23544	4.98582	4.04639	4.73798	4.9735	4.14292	4.49235
ENSG00000176894	5827	PXMP2	2.56132	Up	2.49888	2.40172	2.43099	2.31081	2.68071	3.06059	2.6787	1.55981	2.7566	3.31303	2.49431	2.5497
ENSG00000177084	5426	POLE	2.79266	Up	2.84461	2.91441	3.12697	2.78493	3.22019	3.09955	2.40406	1.88964	2.30017	3.50981	2.387	3.0306
ENSG00000177096	150368	PHETA2	2.81273	Up	2.99012	3.32672	3.15123	3.12123	2.54003	3.65917	2.73419	1.80093	2.66858	2.22012	2.84089	2.69961
ENSG00000177106	64787	EPS8L2	-2.85277	Down	-2.06724	-3.13614	-2.88444	-2.61682	-3.30496	-2.76822	-4.22126	-2.5414	-2.86333	-2.16968	-2.25184	-3.40794
ENSG00000177303	57513	CASKIN2	5.87898	Up	5.79961	5.32125	6.23867	5.1784	6.11262	6.50099	5.85711	4.48184	5.55602	7.65549	5.95563	5.89011
ENSG00000177311	253461	ZBTB38	-4.00891	Down	-3.4901	-3.17228	-4.06127	-5.10206	-4.12191	-3.55189	-4.35492	-3.72938	-3.57607	-4.17608	-4.65039	-4.1205
ENSG00000177455	930	CD19	3.9512	Up	4.18183	3.86054	4.76919	3.84584	3.82307	3.97178	2.81093	3.66505	4.06209	4.72416	3.38723	4.3127
ENSG00000177570	401474	SAMD12	-5.31553	Down	-5.76358	-4.26483	-5.58864	-5.91496	-5.24784	-4.61466	-4.87241	-5.66497	-5.48396	-6.32068	-5.27223	-4.77766
ENSG00000177602	83903	HASPIN	3.08695	Up	3.21685	2.27405	2.80427	3.07247	3.39322	2.94044	3.34825	3.15792	3.39821	4.08288	3.06177	2.2931
ENSG00000177706	56975	FAM20C	2.90347	Up	2.7152	3.49219	2.16466	2.91781	1.9104	2.18678	3.64994	3.93612	3.03032	3.54836	2.9559	2.33402
ENSG00000178217	387694	SH2D4B	6.52002	Up	6.0353	4.44822	7.12328	6.42461	7.31291	6.76661	7.15646	3.78777	6.63624	8.40255	7.08358	7.0627
ENSG00000178234	63917	GALNT11	-3.86918	Down	-3.42351	-4.03437	-4.29603	-4.07935	-3.21799	-2.60391	-4.06602	-4.68689	-4.17044	-3.43126	-4.26106	-4.15927
ENSG00000178404	100653515	CEP295NL	4.12076	Up	3.72822	4.1665	4.67796	4.53702	2.91647	2.41372	3.82514	4.53953	3.4646	5.35376	5.30913	4.51701
ENSG00000178752	151176	ERFE	3.95165	Up	3.82514	2.38339	4.09378	3.25453	5.82331	5.54847	3.59034	2.74072	3.3423	4.05148	4.51096	4.25534
ENSG00000178773	27132	CPNE7	5.01534	Up	5.40895	5.17342	6.41662	6.11365	2.71186	4.83043	3.0909	2.54566	5.79973	7.02371	5.73259	5.33652
ENSG00000178860	9242	MSC	-3.75856	Down	-2.54736	-4.35834	-2.89826	-3.73463	-3.87716	-3.39264	-4.29838	-4.48811	-3.86924	-3.68719	-3.95546	-3.99592
ENSG00000178999	9212	AURKB	2.97138	Up	2.87551	2.70819	2.94871	2.80909	3.35301	2.78983	3.40603	2.50794	3.25597	4.23973	2.58202	2.18058
ENSG00000179674	80117	ARL14	-2.18907	Down	-2.23205	-2.23205	-2.13352	-2.1966	-2.23205	-2.16095	-2.16104	-2.23186	-2.18069	-2.11105	-2.16496	-2.23205
ENSG00000179715	91523	PCED1B	-3.61169	Down	-2.87309	-3.51772	-3.32257	-4.75868	-3.28245	-2.75945	-4.13183	-3.68593	-3.55814	-3.65161	-4.57107	-3.22773
ENSG00000179796	116135	LRRC3B	4.99812	Up	3.11923	2.38905	4.29945	7.41669	6.62392	6.61912	4.48481	2.83586	4.05554	6.80676	6.63351	4.69353
ENSG00000179841	9495	AKAP5	-2.39905	Down	-2.3989	-2.56749	-2.65131	-2.47345	-2.86566	-2.59714	-1.93128	-2.6775	-1.95884	-1.81088	-2.44536	-2.41076
ENSG00000179869	154664	ABCA13	5.9778	Up	4.82308	6.73642	6.87714	6.44555	8.20016	5.24955	5.05644	5.31904	4.79572	5.50506	7.18123	5.54416
ENSG00000180116	283461	C12orf40	-2.07611	Down	-2.13182	-2.20471	-1.65698	-2.36513	-2.04635	-2.1322	-2.23468	-2.1088	-2.10784	-2.04973	-2.2374	-1.63762
ENSG00000180481	144321	GLIPR1L2	-2.82844	Down	-2.81042	-2.50595	-2.26688	-2.48081	-3.06308	-3.07863	-3.25621	-3.38045	-2.61816	-3.53876	-2.45086	-2.49109
ENSG00000180628	84333	PCGF5	-1.92541	Down	-1.64231	-2.1583	-1.9094	-1.76952	-2.19298	-2.06633	-1.50046	-2.45624	-1.66614	-1.73844	-2.05166	-1.95312
ENSG00000180758	80045	GPR157	-2.1923	Down	-1.77845	-1.86869	-2.16479	-2.01542	-3.06473	-2.07687	-1.90135	-2.39644	-1.97113	-2.43827	-2.05231	-2.57918
ENSG00000180891	404093	CUEDC1	3.42425	Up	4.22124	4.50621	4.31601	2.42767	2.03088	2.39755	3.71874	3.44213	4.20093	4.13624	3.47746	2.21591
ENSG00000180998	283554	GPR137C	3.64544	Up	2.96802	3.01734	2.84706	3.87895	3.99442	3.22476	4.60058	3.84473	3.23925	4.56344	3.45915	4.10756
ENSG00000181004	166379	BBS12	-2.42555	Down	-2.06608	-1.70384	-2.78718	-3.16275	-1.90465	-2.44485	-1.94209	-2.26567	-2.35598	-2.92423	-2.63623	-2.91304
ENSG00000181218	92815	H2AC25	-3.15539	Down	-2.49552	-4.26361	-3.08543	-3.57297	-2.65091	-2.57339	-2.92926	-3.48367	-3.46262	-2.95986	-2.90446	-3.48293
ENSG00000181524	377381	RPL24P4	-2.9182	Down	-3.60253	-2.76394	-3.6406	-2.25904	-3.0407	-3.61405	-1.76052	-2.62601	-2.60353	-4.41831	-2.25198	-2.4372
ENSG00000181652	285973	ATG9B	-2.7112	Down	-2.23751	-3.59877	-2.31381	-2.89315	-2.57594	-1.95132	-2.84321	-3.17773	-2.99531	-2.08226	-3.45311	-2.4123
ENSG00000181847	201633	TIGIT	-4.03525	Down	-3.91039	-3.4778	-3.8784	-4.30991	-3.83553	-3.23922	-4.22825	-5.20403	-3.60953	-3.98995	-4.45474	-4.2853
ENSG00000181856	6517	SLC2A4	2.48833	Up	2.87331	1.83184	2.73037	2.59136	2.88526	2.26247	1.84541	2.23388	2.27471	2.35948	3.08688	2.88494
ENSG00000181938	64785	GINS3	2.58932	Up	2.18641	2.29362	2.41286	2.89248	2.50056	3.23165	3.01814	1.92769	2.87861	3.41276	1.85928	2.45779
ENSG00000182134	11022	TDRKH	-2.95675	Down	-4.0321	-2.49725	-3.50126	-2.47293	-2.78179	-3.05595	-2.8503	-3.38571	-2.66225	-1.58453	-3.92859	-2.72829
ENSG00000182359	143879	KBTBD3	-2.25036	Down	-2.1067	-1.97002	-2.23564	-2.44331	-2.46133	-2.32066	-1.94975	-2.53682	-1.88483	-2.32693	-2.32382	-2.44457
ENSG00000182378	55344	PLCXD1	2.41641	Up	2.59335	2.06729	2.91879	1.91403	3.04745	2.79954	2.2097	2.42709	2.20728	1.89757	2.25485	2.66002
ENSG00000182472	147968	CAPN12	-3.29653	Down	-3.45931	-3.06741	-2.24464	-3.80674	-2.80427	-2.56796	-4.17595	-3.52318	-2.91954	-4.78126	-3.49744	-2.71063
ENSG00000182489	402415	XKRX	-3.51398	Down	-2.44281	-3.98047	-3.48285	-3.85061	-2.96967	-2.8817	-4.13562	-3.47623	-3.32601	-3.66382	-4.31033	-3.64768
ENSG00000182511	2242	FES	3.75887	Up	3.79096	3.81595	4.57293	3.16506	2.90181	3.31456	3.29991	4.32604	3.68111	3.51938	4.8671	3.85169
ENSG00000182580	2049	EPHB3	3.63502	Up	2.64216	3.22658	1.88517	3.52868	4.69931	4.14232	5.43408	5.05779	2.94305	4.67316	1.65022	3.73775
ENSG00000182700	492311	IGIP	-3.7003	Down	-4.86599	-3.0062	-3.42991	-3.98152	-3.65212	-3.18957	-3.14234	-4.63884	-3.16718	-4.23231	-3.54396	-3.55363
ENSG00000182704	25987	TSKU	3.39773	Up	3.65977	2.25402	2.50014	5.27869	2.35373	3.45465	3.0964	3.27276	3.30745	4.7259	3.53333	3.33589
ENSG00000182885	222487	ADGRG3	4.74089	Up	5.95289	5.14097	5.71771	4.15948	4.19164	4.54587	3.73995	4.68499	4.11394	4.6866	5.65269	4.30393
ENSG00000182901	6000	RGS7	-3.86917	Down	-3.68749	-3.7499	-3.94195	-4.03547	-3.64394	-4.07716	-3.99369	-3.88538	-3.97518	-3.81586	-3.94085	-3.68313
ENSG00000182963	10052	GJC1	5.15064	Up	2.89808	3.18324	3.22234	6.40763	6.69019	6.23424	7.24277	5.06287	4.0292	8.09623	4.05643	4.68445
ENSG00000182985	23705	CADM1	-3.75866	Down	-3.11743	-4.31604	-3.9187	-4.00455	-3.4647	-3.60343	-4.21754	-4.28938	-2.93599	-2.74693	-4.51843	-3.97074
ENSG00000183019	199675	MCEMP1	3.81595	Up	3.93274	3.33968	2.98216	3.57849	2.89547	3.56797	4.79843	3.94655	3.24028	2.75464	6.00268	4.75235
ENSG00000183032	89874	SLC25A21	2.40371	Up	2.18319	1.52552	2.58663	1.92847	2.9116	2.35192	2.9621	1.97146	2.32172	2.46078	2.9809	2.66019
ENSG00000183154	102723701	LOC102723701	3.08597	Up	2.67716	3.58925	3.01014	3.19011	2.8908	3.05505	4.15691	2.44833	2.95544	3.07771	3.43803	2.54273
ENSG00000183298	730029	RPSAP19	-3.37065	Down	-5.05716	-3.71744	-4.55797	-3.74004	-2.80969	-4.20217	-1.82927	-2.45011	-2.45175	-4.7288	-3.10502	-1.79832
ENSG00000183307	27439	TMEM121B	4.14767	Up	4.12517	3.64717	2.9011	4.01417	2.62148	3.80665	6.69005	6.09342	4.33375	2.14708	5.61121	3.78081
ENSG00000183439	391712	TRIM61	-4.39887	Down	-3.94655	-5.06954	-4.49436	-4.00035	-4.27254	-4.01018	-4.20863	-4.89983	-3.9576	-4.53865	-4.54994	-4.83823
ENSG00000183508	54855	TENT5C	-2.38981	Down	-2.08917	-3.24276	-2.197	-1.9011	-2.27847	-2.28853	-2.59072	-2.55879	-2.44405	-2.06479	-2.52743	-2.4949
ENSG00000183722	10186	LHFPL6	5.15913	Up	5.25872	5.40346	3.9764	5.0281	5.64152	5.17263	7.46058	5.41227	4.75982	4.36673	4.85349	4.57589
ENSG00000183762	83999	KREMEN1	4.0144	Up	3.60267	2.73182	3.54185	6.15112	5.3313	3.50636	3.27989	5.67081	2.90319	3.06305	5.48509	2.9056
ENSG00000183779	80139	ZNF703	4.21965	Up	3.84357	2.50367	3.60681	5.48425	4.77643	5.11122	4.21829	4.31861	4.04846	5.63532	4.47586	2.61337
ENSG00000183850	100129543	ZNF730	4.75932	Up	4.8618	3.98813	4.37906	3.94663	5.87427	5.08144	5.12209	4.32359	4.97655	5.28843	4.12706	5.14282
ENSG00000183856	128239	IQGAP3	6.67575	Up	6.77562	6.37657	7.03767	6.23551	7.13533	6.41477	6.51861	6.46098	6.47523	7.77587	6.28008	6.62276
ENSG00000183921	100288072	SDR42E2	-3.09765	Down	-3.25079	-2.87295	-1.99029	-2.98858	-3.8502	-3.45246	-2.49736	-4.15397	-3.09248	-3.51078	-2.12971	-3.3822
ENSG00000183963	6525	SMTN	2.60295	Up	2.16192	1.96257	2.19462	2.10461	3.76861	2.87315	3.19348	1.86077	2.24391	3.25478	2.36704	3.24996
ENSG00000184194	54328	GPR173	3.96323	Up	3.39612	3.70759	2.67341	4.697	3.30111	3.96859	4.69338	4.22881	2.23561	5.49898	3.77959	5.37852
ENSG00000184305	401145	CCSER1	-3.78382	Down	-3.55827	-3.22002	-3.62632	-4.50354	-3.52106	-3.33386	-3.76335	-3.1667	-4.05018	-4.413	-4.34264	-3.90694
ENSG00000184357	3009	H1-5	3.07831	Up	3.18289	2.50584	3.1905	3.15626	3.19816	3.33551	3.01698	1.97423	3.34299	5.06621	2.86949	2.10063
ENSG00000184515	340542	BEX5	-4.82804	Down	-4.77937	-3.76551	-4.8643	-5.35258	-4.89218	-4.60712	-3.56831	-5.59393	-5.04743	-5.22346	-5.10947	-5.13276
ENSG00000184661	157313	CDCA2	2.3514	Up	2.16887	1.78318	2.0269	1.83812	3.2191	1.99824	2.91799	1.91154	3.00324	3.09502	1.97984	2.27479
ENSG00000184678	8349	H2BC21	2.48101	Up	2.93509	1.84438	2.5805	2.56553	2.69119	2.70855	1.65428	2.41564	2.20185	3.83136	2.54317	1.80053
ENSG00000184702	5413	SEPTIN5	4.41838	Up	4.50159	2.95566	4.04032	3.85192	6.43171	5.16632	2.45653	4.44705	4.6455	4.78706	5.08766	4.64921
ENSG00000184792	23762	OSBP2	3.47183	Up	3.9787	2.05091	3.54461	3.10248	4.58917	3.31533	3.68135	3.07379	2.97852	3.75479	4.00362	3.58866
ENSG00000184860	93517	SDR42E1	-4.38763	Down	-3.51049	-4.43689	-4.69051	-5.13355	-4.09507	-3.33521	-4.75381	-4.44186	-4.09217	-4.98502	-4.8311	-4.34594
ENSG00000184937	7490	WT1	4.75995	Up	4.07553	3.91313	3.73631	8.14634	3.73914	3.24761	2.48057	6.71722	5.54896	4.26862	7.34529	3.90065
ENSG00000185028	389257	LRRC14B	5.72891	Up	6.96904	4.36864	5.95413	4.21374	6.43104	7.10162	4.36682	3.50726	8.20712	9.08977	3.94929	4.5884
ENSG00000185115	56160	NSMCE3	-1.9892	Down	-1.69177	-2.4359	-2.15989	-1.52828	-2.0649	-1.78098	-1.87973	-2.2803	-2.12171	-1.53387	-1.92709	-2.46591
ENSG00000185130	8340	H2BC13	3.07606	Up	3.60406	1.89386	3.06485	3.00121	3.39226	3.02114	2.382	2.96501	3.21543	4.93394	2.89283	2.54618
ENSG00000185198	400668	PRSS57	5.94896	Up	6.59029	7.31401	6.78876	6.32074	3.81327	4.86628	4.83057	7.2723	5.89244	4.61361	7.98691	5.09828
ENSG00000185215	7127	TNFAIP2	3.24593	Up	3.35487	4.23327	3.93918	2.92707	2.54043	2.34059	2.98458	2.68734	2.82298	3.53263	4.2635	3.32474
ENSG00000185291	3563	IL3RA	5.0758	Up	4.82169	5.64138	4.31508	5.82508	4.53875	4.39734	6.60188	6.17314	3.81352	3.04949	6.83878	4.89346
ENSG00000185345	5071	PRKN	-4.39103	Down	-3.70508	-4.11817	-4.70941	-4.14898	-3.82776	-4.08728	-5.07931	-4.44243	-4.86316	-4.70383	-4.81439	-4.19253
ENSG00000185614	389119	INKA1	3.24961	Up	3.49152	2.88939	3.25126	3.04361	3.28663	3.6668	2.9318	3.43788	3.01516	3.52347	3.44326	3.01449
ENSG00000185915	257240	KLHL34	-3.4195	Down	-3.14928	-3.51817	-3.63167	-3.53952	-2.99639	-3.00657	-3.39532	-3.50394	-3.44314	-3.60607	-3.65521	-3.58874
ENSG00000186026	342909	ZNF284	-2.61731	Down	-3.82568	-2.47617	-2.6735	-2.52471	-2.42645	-2.26613	-2.04221	-2.93462	-2.54971	-2.81697	-2.73127	-2.14028
ENSG00000186185	146909	KIF18B	4.63603	Up	4.67531	3.9732	5.02391	4.24473	5.07954	4.59464	4.46387	4.21066	4.83877	6.38692	4.05324	4.08752
ENSG00000186187	84937	ZNRF1	5.29832	Up	4.8012	5.00688	5.13956	5.32337	4.89755	5.28265	5.44803	6.3939	4.77642	5.16245	6.3254	5.02239
ENSG00000186231	114792	KLHL32	-4.18453	Down	-3.58972	-4.99895	-4.27481	-4.64975	-3.86676	-3.74918	-4.61995	-4.6355	-3.94382	-3.21275	-4.68628	-3.98686
ENSG00000186265	151888	BTLA	-5.45059	Down	-6.06639	-3.3453	-6.09014	-7.02615	-5.40917	-5.15956	-5.63663	-5.74763	-5.94074	-6.89974	-1.63374	-6.45184
ENSG00000186310	4675	NAP1L3	-4.256	Down	-3.64166	-4.90391	-4.03687	-4.91227	-3.28982	-3.51666	-4.26438	-4.14008	-4.38732	-5.02527	-4.37225	-4.58151
ENSG00000186462	4674	NAP1L2	-6.6146	Down	-5.94733	-6.86043	-6.64749	-6.88846	-6.21567	-6.41384	-6.91116	-7.45453	-6.43303	-6.82726	-6.61094	-6.16505
ENSG00000186522	151011	SEPTIN10	-4.46039	Down	-3.85487	-4.87536	-4.58572	-4.51055	-4.19891	-4.57609	-4.65867	-4.76006	-4.26037	-4.48321	-4.54591	-4.21501
ENSG00000186529	4051	CYP4F3	4.57393	Up	4.83184	5.8944	5.50976	4.70716	4.63687	3.03262	3.72561	4.61304	3.8871	4.51743	5.81776	3.71358
ENSG00000186638	347240	KIF24	3.30411	Up	2.93392	2.9471	3.48118	2.78319	3.67716	3.28959	3.5316	2.80201	3.44097	4.46516	2.95267	3.34478
ENSG00000186652	5553	PRG2	4.22911	Up	3.4752	5.4331	4.04931	4.05033	3.95932	3.75811	4.21687	4.57533	4.439	3.25636	5.14124	4.39508
ENSG00000186854	105374836	LOC105374836	-3.93895	Down	-3.08818	-3.11689	-3.62542	-4.64753	-3.79512	-3.41138	-4.27761	-4.05723	-4.10461	-4.37005	-4.15075	-4.62269
ENSG00000186952	642987	TMEM232	-2.70954	Down	-2.94463	-2.74973	-2.49781	-1.64869	-2.4844	-3.43086	-3.3542	-1.88349	-2.33196	-3.77531	-3.20572	-2.20763
ENSG00000186998	129080	EMID1	3.54264	Up	3.78313	5.30481	3.39106	3.06111	1.82054	3.28682	3.10967	5.88128	2.48382	1.92252	4.79709	3.66986
ENSG00000187066	100130348	TMEM262	-2.27633	Down	-2.47688	-2.71833	-2.13686	-2.41534	-2.30403	-2.33031	-1.85966	-1.9565	-2.14028	-2.8123	-1.79854	-2.36696
ENSG00000187244	4059	BCAM	3.61878	Up	3.93012	2.68985	3.62654	4.61295	3.27868	3.45789	2.67376	2.78617	3.53313	5.60632	3.398	3.83189
ENSG00000187475	3010	H1-6	4.32271	Up	3.71021	3.65598	4.36795	4.08821	5.56174	4.81006	4.43226	4.17563	4.20244	4.41364	4.4985	3.95592
ENSG00000187792	7621	ZNF70	2.70978	Up	2.12424	2.93537	3.15325	2.68854	2.49177	2.11921	2.18859	2.92108	2.60289	3.57122	2.71401	3.00717
ENSG00000187994	126432	RINL	-2.24738	Down	-2.15523	-2.10537	-1.85418	-2.35109	-2.97554	-2.26494	-2.55502	-1.99846	-1.72214	-2.33932	-2.16959	-2.4777
ENSG00000188001	285386	TPRG1	-3.52191	Down	-3.21886	-3.25828	-3.30665	-3.75142	-3.16363	-3.37635	-3.70652	-3.68612	-3.00698	-4.03054	-3.95113	-3.80646
ENSG00000188011	285093	RTP5	5.2087	Up	6.22723	3.60204	4.31078	7.08954	3.09942	4.84676	5.39324	4.66646	5.3465	6.03319	6.61201	5.27724
ENSG00000188229	10383	TUBB4B	2.42141	Up	2.57724	1.93136	2.47735	2.85358	2.43186	1.94244	1.65626	2.3854	2.75145	3.13479	2.99272	1.92242
ENSG00000188486	3014	H2AX	2.77278	Up	3.53144	2.19671	3.13661	3.21191	2.62665	2.38256	1.77306	2.51311	2.80945	4.23517	2.9553	1.90138
ENSG00000188536	3040	HBA2	7.12251	Up	9.72241	4.64298	7.78303	6.87162	8.26909	7.72406	5.60769	7.24153	6.11857	7.28547	6.92135	7.28237
ENSG00000188549	388115	CCDC9B	3.34087	Up	3.36821	4.5563	4.85552	2.72689	2.01637	1.97291	3.40967	3.71115	4.14072	2.80666	3.28168	3.2444
ENSG00000188554	4077	NBR1	-1.95825	Down	-2.17345	-1.71614	-1.89954	-2.06476	-2.04962	-1.89535	-1.8593	-2.01251	-1.78256	-2.01672	-2.08934	-1.9397
ENSG00000188611	56624	ASAH2	-3.20416	Down	-2.61536	-3.67679	-3.49098	-3.69759	-1.68823	-2.65818	-3.2861	-3.58604	-2.45725	-3.92383	-4.14229	-3.22734
ENSG00000188672	6006	RHCE	4.20093	Up	4.29524	2.80381	4.53699	3.74117	5.45663	3.64476	4.49752	4.12736	4.0842	3.49006	4.71514	5.01824
ENSG00000188807	199953	TMEM201	2.68902	Up	2.97266	1.64689	2.45886	3.52938	2.67112	2.89491	1.51254	3.21555	2.69033	4.26495	2.68747	1.72351
ENSG00000188868	147837	ZNF563	-2.60135	Down	-1.84592	-2.61981	-2.9197	-3.17874	-2.32308	-2.3917	-2.28043	-2.85268	-2.68324	-3.00088	-2.73502	-2.38497
ENSG00000189060	3005	H1-0	5.96059	Up	4.76728	6.13357	6.79762	5.98251	7.46676	7.19557	6.26698	4.43011	5.52635	4.11122	7.5845	5.26459
ENSG00000189233	389643	NUGGC	-4.78578	Down	-3.79186	-4.02307	-4.8525	-5.41573	-4.97642	-4.40329	-5.66288	-5.21427	-3.73151	-4.96143	-5.8316	-4.56477
ENSG00000189367	9729	KIAA0408	-5.46744	Down	-5.90819	-4.8749	-5.99992	-5.95758	-4.62206	-4.46912	-5.14494	-5.63672	-5.38639	-6.45652	-5.99381	-5.15915
ENSG00000189431	644943	RASSF10	4.83366	Up	4.43725	6.08867	5.40144	5.09058	6.75077	7.07203	4.20997	3.89186	2.17342	5.25712	3.9036	3.72725
ENSG00000196123	653319	MATCAP1	2.19931	Up	2.1443	1.6724	2.16281	2.40837	2.35069	2.34013	1.66039	2.00006	2.0278	2.46389	2.61602	2.54478
ENSG00000196188	1510	CTSE	3.44567	Up	2.97803	3.01903	3.56494	3.30834	4.74289	2.93824	3.85148	2.63985	2.89679	3.397	4.54586	3.46561
ENSG00000196230	203068	TUBB	2.66391	Up	2.48295	2.36132	2.39274	2.16742	3.29734	3.0545	2.87762	2.21118	2.80536	3.54802	2.34705	2.42141
ENSG00000196296	487	ATP2A1	2.84314	Up	3.57752	2.35292	2.70842	3.3829	2.63321	2.23301	2.03969	3.07662	2.53126	3.58558	2.55264	3.44388
ENSG00000196371	2526	FUT4	2.45094	Up	2.40811	2.70161	2.26653	2.49239	2.15462	2.37637	2.67569	3.16098	2.0329	1.99583	2.79264	2.35364
ENSG00000196411	2050	EPHB4	3.62376	Up	3.88635	3.60116	4.12948	4.29962	4.3196	4.46623	3.73727	2.78063	3.49694	1.9858	3.62541	3.15658
ENSG00000196415	5657	PRTN3	4.67118	Up	4.71489	5.92196	5.0886	4.90969	4.27281	4.10384	4.12834	4.60291	4.04096	6.26861	5.13536	2.86616
ENSG00000196465	140465	MYL6B	3.30768	Up	3.44553	2.96774	3.56676	3.63042	3.16684	3.34297	2.79728	2.88385	3.4323	4.02898	3.4256	3.00395
ENSG00000196476	140680	C20orf96	2.6725	Up	2.49398	2.43022	2.67441	2.62278	3.07694	2.61225	2.14477	3.19183	2.61362	2.62787	2.7371	2.84418
ENSG00000196503	132946	ARL9	3.53415	Up	3.97252	2.83489	2.51754	3.16144	2.77154	2.29684	4.37369	3.95017	4.36779	4.44329	4.23294	3.48713
ENSG00000196511	27010	TPK1	-3.50035	Down	-3.32473	-2.60747	-4.15642	-3.86416	-3.63674	-3.39861	-3.22607	-3.07062	-3.54592	-3.85959	-3.56122	-3.75259
ENSG00000196565	3048	HBG2	6.50798	Up	8.05929	3.91181	6.43778	6.38629	7.96667	7.20595	6.28583	8.72221	5.55575	4.77846	6.61925	6.16641
ENSG00000196576	23654	PLXNB2	5.40614	Up	5.36148	6.01887	6.65721	4.34234	4.70319	5.10982	4.42887	6.21369	5.28685	6.48216	4.92917	5.34007
ENSG00000196632	65267	WNK3	-2.67585	Down	-3.27395	-4.38245	-3.5499	-3.4864	3.31652	2.69167	-4.03702	-4.77832	-4.495	-3.19419	-3.58866	-3.33254
ENSG00000196636	57001	SDHAF3	-2.20207	Down	-1.90654	-1.99145	-2.19644	-1.9643	-2.35433	-2.69234	-3.0229	-2.22644	-1.50824	-2.39725	-1.65178	-2.51282
ENSG00000196653	91392	ZNF502	-3.98767	Down	-3.35365	-2.70741	-3.24437	-4.26698	-4.73214	-3.82216	-2.15656	-4.91084	-4.54062	-3.96917	-4.72808	-5.42001
ENSG00000196747	8329	H2AC13	4.05965	Up	5.02803	3.24396	4.68966	3.94844	4.39354	4.73232	3.10781	3.2605	4.12265	5.25317	3.79542	3.14029
ENSG00000196782	55534	MAML3	3.26127	Up	3.09568	3.54099	3.45836	2.93829	3.28395	3.41397	4.2065	3.46832	2.65029	2.13368	3.33619	3.60902
ENSG00000196787	8969	H2AC11	2.29631	Up	2.59749	1.52797	2.52496	2.10813	2.71807	2.38584	1.80173	1.81644	2.31458	3.90139	2.17135	1.68781
ENSG00000196839	100	ADA	3.58969	Up	4.35889	2.91976	3.94834	3.47147	3.19236	3.57992	2.75675	3.96994	4.06825	3.92771	3.35315	3.52973
ENSG00000196862	285190	RGPD4	-2.86465	Down	-2.32537	-2.53724	-2.76392	-2.91028	-2.82044	-3.61158	-2.53087	-2.26897	-2.37247	-4.75336	-3.06177	-2.41955
ENSG00000196923	9260	PDLIM7	2.40251	Up	2.29098	1.69978	2.03085	1.73669	3.32656	3.52386	2.04401	1.86679	2.0167	3.16312	3.00815	2.12265
ENSG00000197093	79690	GAL3ST4	3.26414	Up	3.2949	3.14864	4.08061	3.52367	3.73008	3.52822	2.19479	2.71229	2.8874	3.3043	3.1798	3.58494
ENSG00000197119	123096	SLC25A29	2.57615	Up	2.31608	2.3004	2.4007	4.05401	2.02255	2.21108	2.05373	2.57952	2.21876	3.87265	2.94468	1.93962
ENSG00000197122	6714	SRC	2.89206	Up	2.81392	2.35045	2.92274	3.37991	2.66906	3.01919	2.56114	2.99543	2.48461	3.717	3.33898	2.45234
ENSG00000197153	8356	H3C12	3.84361	Up	4.99033	3.0164	4.40609	3.62249	3.7442	4.79406	2.24429	3.06905	4.26472	6.31265	3.50521	2.15378
ENSG00000197208	6583	SLC22A4	4.2327	Up	5.56948	4.56559	4.56017	3.49724	4.14174	3.1704	4.2178	4.32715	4.22841	3.44212	5.38259	3.68966
ENSG00000197256	25959	KANK2	6.67465	Up	6.13524	6.91987	5.44844	6.70269	7.43624	7.89299	7.47759	4.82545	5.88547	8.19681	7.02789	6.14717
ENSG00000197429	3652	IPP	-2.01597	Down	-2.13892	-2.67977	-2.18512	-1.99257	-1.59862	-1.55771	-2.3298	-1.57582	-1.69866	-1.54149	-2.96532	-1.92786
ENSG00000197461	5154	PDGFA	3.9804	Up	3.56207	2.88509	2.87102	4.44179	1.62728	3.92194	6.91	4.42922	2.96796	3.68621	4.94596	5.51623
ENSG00000197472	57116	ZNF695	4.9758	Up	4.79002	4.26593	4.51934	4.18412	5.21745	4.76306	6.56509	4.19467	4.78231	6.67349	4.67649	5.07762
ENSG00000197561	1991	ELANE	4.83388	Up	4.92658	5.88122	5.39429	4.6963	4.92356	4.12343	4.46907	4.83474	4.03024	5.75215	5.2955	3.6795
ENSG00000197594	5167	ENPP1	-2.51929	Down	-2.66523	-2.4611	-2.5009	-2.21067	-2.46429	-2.92698	-2.50787	-2.4251	-2.36478	-2.54051	-3.11779	-2.04621
ENSG00000197702	55742	PARVA	-2.45955	Down	-2.36976	-2.67445	-2.34972	-2.33933	-1.92247	-2.67939	-2.57131	-2.84209	-2.51723	-2.88209	-1.92924	-2.43749
ENSG00000197903	85236	H2BC12	2.76156	Up	3.53187	2.11549	2.90399	2.67132	3.01701	3.13954	1.7855	2.57692	2.73437	4.21034	2.30412	2.14829
ENSG00000197993	3792	KEL	4.27843	Up	4.74004	3.09303	4.95655	3.99072	5.37492	3.79673	3.98479	3.59153	3.89226	4.34928	4.96543	4.60584
ENSG00000198010	9228	DLGAP2	5.65528	Up	5.31121	6.76239	7.13371	3.29124	8.16933	7.99665	6.07417	2.9553	3.13645	8.727	2.26009	6.04586
ENSG00000198142	65124	SOWAHC	-2.92128	Down	-2.55613	-3.27449	-2.88798	-2.54593	-2.81252	-2.88003	-3.36692	-2.9655	-3.19025	-2.06369	-2.87207	-3.63988
ENSG00000198336	4635	MYL4	4.39149	Up	4.23351	2.95177	4.38648	4.15986	5.06514	3.85951	4.47225	4.03996	4.42115	5.84065	4.79189	4.47568
ENSG00000198369	200734	SPRED2	3.74415	Up	3.00021	5.34488	2.01375	3.80265	2.73568	2.93007	4.23332	3.69783	3.99265	4.99047	5.28643	2.90185
ENSG00000198467	7169	TPM2	3.06901	Up	3.32442	3.476	3.7412	2.65199	2.59917	2.08787	2.14172	3.95022	2.2442	3.28651	3.04203	4.28274
ENSG00000198720	124930	ANKRD13B	3.20259	Up	3.6019	2.58316	3.23238	3.42594	2.31116	2.4201	2.6092	3.47482	3.49074	4.67536	3.25148	3.35482
ENSG00000198795	25925	ZNF521	3.187	Up	2.99039	3.07843	3.07848	3.68123	3.00737	3.15012	2.71179	4.05587	3.40634	3.6974	3.32345	2.06311
ENSG00000198832	140606	SELENOM	-3.77151	Down	-2.29277	-3.50123	-3.84168	-4.47408	-4.10501	-3.01933	-3.75759	-4.95219	-3.70007	-3.71657	-4.23051	-3.66704
ENSG00000198838	6263	RYR3	4.2359	Up	4.14941	4.73458	4.13882	4.57917	7.22088	5.57675	3.66795	2.31234	3.96313	2.74031	2.85113	4.89634
ENSG00000198853	9853	RUSC2	4.05259	Up	4.72334	3.97884	3.47122	2.86582	4.83196	5.1715	3.24823	4.62249	3.04306	4.06923	4.93844	3.66688
ENSG00000198865	100129792	CCDC152	-3.77588	Down	-3.19533	-2.76999	-4.57577	-5.40222	-4.4426	-4.10977	-2.5562	-3.56867	-3.19521	-3.46227	-5.22395	-2.80862
ENSG00000198901	9055	PRC1	2.17391	Up	2.13134	1.58519	2.08738	2.35236	2.37868	1.58188	2.46693	1.97083	2.53152	2.93762	2.18218	1.88105
ENSG00000198929	9722	NOS1AP	4.44843	Up	4.48982	4.39843	4.20447	5.75271	5.35826	5.34556	5.11687	3.51425	2.02204	3.44081	3.39252	6.34538
ENSG00000198964	259230	SGMS1	-2.25452	Down	-2.3991	-2.05281	-2.57883	-2.10605	-1.70094	-1.87627	-1.66518	-3.1793	-2.01787	-2.6058	-2.28416	-2.58798
ENSG00000203739	101928673	PRDX6-AS1	-2.22111	Down	-2.95083	-1.62245	-2.06246	-1.9178	-2.75276	-1.653	-1.75343	-3.1185	-2.46693	-2.1134	-1.85546	-2.38635
ENSG00000203760	387103	CENPW	2.68331	Up	2.59481	2.25569	2.19711	2.81684	3.18082	2.87401	3.61236	1.95172	3.0095	2.53642	2.52542	2.64502
ENSG00000203797	8528	DDO	3.38556	Up	3.55109	5.04794	4.52566	2.40684	1.60726	2.50557	5.20359	1.76535	4.634	2.68322	3.03151	3.6647
ENSG00000204010	439996	IFIT1B	5.15022	Up	5.81232	3.19229	4.9059	5.38657	6.7782	4.9707	6.09168	4.77965	4.45835	4.68524	5.38888	5.3529
ENSG00000204099	129807	NEU4	5.6835	Up	6.81341	4.42266	5.52168	7.50093	4.53193	5.69071	5.75712	4.52947	5.29295	5.98188	7.43641	4.72286
ENSG00000204147	653308	ASAH2B	-4.52146	Down	-4.95228	-4.16536	-5.18643	-5.36545	-2.78839	-3.58376	-3.9004	-5.49537	-3.41108	-5.59009	-5.36065	-4.45822
ENSG00000204161	170371	TMEM273	-4.40444	Down	-4.45353	-2.00391	-3.51344	-6.30747	-4.70844	-3.55146	-2.64812	-5.43428	-4.13369	-6.52105	-5.72901	-3.84885
ENSG00000204186	57683	ZDBF2	-3.63026	Down	-2.72982	-4.74157	-4.61328	-3.30911	-2.61937	-2.9207	-3.39107	-3.83314	-3.97356	-3.30695	-4.34803	-3.77655
ENSG00000204241	100128239	LINC02731	-3.22468	Down	-3.28365	-3.37855	-3.27928	-2.54993	-3.4444	-2.77689	-3.46873	-3.46684	-3.16411	-2.81644	-3.41948	-3.64788
ENSG00000204271	169981	SPIN3	-5.99665	Down	-5.85229	-5.64902	-5.77392	-6.57004	-5.83091	-5.35532	-5.84988	-6.673	-5.90059	-6.18848	-6.18565	-6.13068
ENSG00000204323	643008	SMIM5	2.90176	Up	3.34664	2.8658	3.35178	2.64919	2.96672	3.1915	2.81532	2.02311	2.63868	3.46159	2.51538	2.99544
ENSG00000204410	4439	MSH5	2.58197	Up	2.75169	2.28858	2.98729	2.38211	2.37184	2.37013	2.2506	3.02645	2.59148	2.94825	2.25681	2.75836
ENSG00000204420	80739	MPIG6B	4.30489	Up	4.07978	3.48204	3.81685	6.02899	4.4616	4.60403	4.74126	3.56825	3.40577	1.62252	5.66585	6.18174
ENSG00000204469	7916	PRRC2A	2.11352	Up	2.38754	1.93102	2.3905	2.12673	2.14486	2.3764	1.54892	2.08367	1.98485	2.97975	1.73421	1.67376
ENSG00000204475	259197	NCR3	-3.01141	Down	-1.98959	-2.72894	-2.68749	-3.95873	-3.04527	-1.67719	-4.22954	-3.21585	-2.83077	-2.90875	-3.55333	-3.31141
ENSG00000204613	10107	TRIM10	4.89579	Up	4.65445	3.36794	5.34992	4.55088	6.07667	4.53982	5.86117	3.90669	4.51368	4.49935	5.71907	5.7098
ENSG00000204936	57126	CD177	3.62936	Up	3.83395	4.18027	3.48299	3.9497	3.33536	3.10636	3.60616	4.70653	3.29332	3.09028	4.04159	2.92584
ENSG00000204960	338436	BLACE	7.7478	Up	8.32284	9.28375	9.6225	3.23719	10.2963	10.8395	9.36905	3.61201	7.87444	6.4266	3.82892	10.2605
ENSG00000205639	388931	MFSD2B	3.2348	Up	3.54416	2.02732	3.70585	3.01126	3.75056	3.20339	2.94964	3.19949	3.09838	3.67618	3.70535	2.94603
ENSG00000205726	6453	ITSN1	2.7318	Up	2.27614	2.05182	2.09262	2.67011	2.46069	2.00304	4.16771	2.97675	2.58582	1.95793	2.69842	4.8405
ENSG00000205755	64109	CRLF2	4.39606	Up	7.55792	4.26798	8.10235	2.77399	1.67735	3.05156	5.44835	4.77601	4.27753	2.15177	3.64722	5.02073
ENSG00000205978	57523	NYNRIN	4.99124	Up	4.07878	4.43263	4.31399	5.79022	4.44644	3.57113	3.81372	5.04902	6.02797	9.45034	4.903	4.0176
ENSG00000206172	3039	HBA1	8.95809	Up	11.232	6.37746	9.36435	8.54396	9.96513	9.57465	7.38031	8.96205	7.91753	10.4851	8.91116	8.78336
ENSG00000206177	3042	HBM	5.02071	Up	6.37504	2.67928	5.67835	5.00611	5.84617	5.57643	3.92702	4.40015	4.61294	5.58546	5.87787	4.68375
ENSG00000206579	114786	XKR4	4.8352	Up	3.34499	5.38002	5.48145	7.7199	6.23708	6.43189	3.30916	3.0252	2.64274	8.19984	1.94856	4.30151
ENSG00000207274	109617008	SNORA70I	3.43523	Up	5.12898	2.85879	3.51753	4.08119	3.19825	2.60719	3.06071	3.42671	3.14362	3.86375	3.18901	3.14705
ENSG00000211772	28638	TRBC2	-3.72803	Down	-2.44975	-3.60725	-4.12674	-3.8488	-3.35865	-3.08963	-4.68797	-4.45626	-3.57721	-4.60545	-3.40253	-3.52611
ENSG00000212993	5462	POU5F1B	-3.46205	Down	-3.05542	-3.39729	-3.7541	-3.85035	-3.01423	-3.22541	-3.65967	-3.33269	-3.59161	-3.70053	-3.61336	-3.34999
ENSG00000213252	100422300	LOC100422300	-2.30188	Down	-2.79515	-2.36077	-2.27683	-2.47498	-2.30115	-2.51668	-2.40473	-1.6996	-2.01642	-2.52676	-2.27292	-1.97654
ENSG00000213261	647030	EEF1B2P6	-2.66925	Down	-2.77885	-2.73553	-3.27906	-2.33744	-2.84774	-3.41431	-1.96426	-2.05195	-1.99241	-4.41868	-1.75708	-2.45372
ENSG00000213347	83463	MXD3	2.99553	Up	3.6974	2.79078	3.62	1.76327	2.8445	3.31324	2.95722	2.58272	2.96416	4.23725	2.33374	2.84206
ENSG00000213420	221914	GPC2	3.81067	Up	4.2753	3.11878	4.58846	4.39968	4.44204	4.15652	2.47411	3.06806	3.05368	4.54776	3.97347	3.63016
ENSG00000213442	390354	RPL18AP3	-2.70603	Down	-3.73632	-2.45487	-3.40671	-2.28553	-2.57813	-3.262	-1.55832	-2.62191	-2.15648	-3.96408	-2.30228	-2.1458
ENSG00000213613	100271271	RPL11P3	2.16922	Up	1.6525	2.49744	1.84825	1.80693	1.75914	2.22805	2.1447	2.31111	2.32903	3.23714	2.03223	2.18412
ENSG00000213722	23564	DDAH2	2.49365	Up	2.09495	2.3295	2.56276	2.56329	2.66222	2.88105	2.95393	2.60051	2.15012	2.35531	2.70798	2.06214
ENSG00000213859	147040	KCTD11	-2.48974	Down	-2.37912	-2.35121	-2.69804	-2.60521	-2.03917	-1.71245	-3.03158	-2.21573	-2.28447	-2.84069	-2.61673	-3.10248
ENSG00000213860	728501	RPL21P75	-3.56762	Down	-3.58267	-3.12752	-3.95505	-3.72245	-4.35649	-4.97004	-3.55357	-3.23855	-2.55897	-3.56151	-3.16727	-3.01733
ENSG00000213862	644029	RPL7AP62	-2.85009	Down	-4.29447	-2.50697	-3.5942	-2.5993	-2.64107	-3.4259	-1.54867	-2.47991	-2.37192	-4.37831	-2.18088	-2.17946
ENSG00000213864	1934	EEF1B2P2	-2.12213	Down	-2.61907	-1.98084	-2.20847	-2.09653	-2.29177	-2.59442	-1.63068	-1.55319	-1.91375	-2.80609	-1.72375	-2.04703
ENSG00000214338	387104	SOGA3	-4.34914	Down	-3.59006	-4.69512	-4.6863	-5.21174	-3.14299	-2.91611	-4.83924	-4.12648	-4.36752	-5.48581	-5.13237	-3.99591
ENSG00000214357	54492	NEURL1B	6.86234	Up	6.35552	8.17364	8.32646	5.32386	7.27095	7.01483	7.13572	5.17425	7.13886	7.25448	6.49847	6.6811
ENSG00000214362	643981	RPS3AP36	-4.42354	Down	-6.60039	-3.7943	-5.31071	-4.63627	-3.85879	-5.33071	-1.67173	-4.00041	-4.24962	-6.69327	-3.88838	-3.04796
ENSG00000214535	92682	RPS15AP1	-3.19174	Down	-4.12492	-3.04183	-4.10382	-3.30545	-2.87767	-4.03044	-1.74565	-2.36038	-2.5559	-5.13727	-2.55674	-2.46083
ENSG00000214575	64506	CPEB1	-1.7547	Down	-1.65278	-1.89853	-1.56201	-1.82641	-1.67329	-1.74802	-1.82336	-1.80337	-1.78842	-1.86739	-1.63528	-1.77756
ENSG00000214900	196913	LINC01599	-2.88924	Down	-2.96051	-2.03337	-2.22476	-3.66431	-3.46147	-3.02424	-2.12937	-3.21257	-2.95328	-3.14281	-2.95712	-2.90709
ENSG00000214917	390848	RPS15AP35	-3.96333	Down	-5.61329	-3.57082	-4.57153	-4.27551	-3.35395	-4.72076	-1.98816	-3.43	-3.89727	-5.59504	-3.55888	-2.98478
ENSG00000214922	285830	HLA-F-AS1	-2.53709	Down	-3.23079	-3.0031	-2.61091	-2.05689	-3.30699	-2.44478	-2.0538	-2.05105	-1.88793	-2.4756	-2.6448	-2.67847
ENSG00000214954	100130742	LRRC69	-1.99842	Down	-2.46977	-1.52987	-2.15527	-1.7092	-2.31054	-2.53973	-2.06453	-1.60256	-1.685	-1.86012	-1.58675	-2.46765
ENSG00000215045	392862	GRID2IP	5.11715	Up	5.62401	3.30804	5.67835	2.81434	5.67763	6.00582	4.4621	3.7113	5.94753	8.16711	4.32129	5.68823
ENSG00000216480	642738	RPL21P69	-2.70132	Down	-3.37837	-2.86179	-2.8567	-2.77549	-2.56276	-2.93855	-2.00946	-2.65724	-2.68069	-3.15034	-2.16242	-2.38205
ENSG00000218208	728590	RPS27AP11	-2.92188	Down	-3.48841	-3.11038	-3.3347	-3.20555	-2.72521	-3.36214	-2.12028	-2.39684	-2.70145	-3.87317	-2.53212	-2.2123
ENSG00000218819	100129278	TDRD15	-3.27487	Down	-3.49627	-3.66383	-2.97483	-3.30249	-2.81218	-2.64381	-2.91809	-3.66075	-3.49083	-3.45381	-3.67078	-3.21076
ENSG00000219023	646819	RPS15AP19	-2.37673	Down	-2.20506	-3.28737	-2.88487	-2.37439	-2.22175	-2.7251	-2.01443	-1.73015	-1.7241	-2.97987	-2.08434	-2.28928
ENSG00000219133	641293	RPL21P19	-3.97692	Down	-5.5082	-3.70432	-4.73323	-4.08511	-3.67159	-5.25752	-2.29924	-2.9745	-3.92408	-5.47768	-3.43319	-2.65433
ENSG00000219545	729852	UMAD1	-2.20774	Down	-2.71398	-1.83833	-2.18072	-2.45956	-2.0878	-2.22315	-1.78087	-1.9689	-2.09728	-2.81513	-2.32607	-2.00103
ENSG00000219607	648791	PPP1R3G	4.13477	Up	3.01262	3.26576	2.33918	3.93233	3.39384	4.40519	4.74409	5.5764	3.63838	4.12163	7.67536	3.51241
ENSG00000219642	100421515	BMPR1AP1	-2.7635	Down	-2.84882	-2.95194	-2.48191	-2.71383	-2.85035	-2.87792	-2.80384	-2.80819	-2.58875	-2.69091	-2.83976	-2.70579
ENSG00000220323	337874	H2BC19P	2.15789	Up	1.85502	2.12817	2.37721	1.93191	2.6361	1.98067	1.68753	2.74483	1.63084	2.42039	2.42124	2.08081
ENSG00000220749	100131205	RPL21P28	-3.36578	Down	-4.33284	-3.34898	-4.04472	-3.6561	-3.00593	-4.2657	-2.04585	-2.8415	-2.85324	-4.94861	-2.86531	-2.18054
ENSG00000220842	729402	RPL21P16	-4.24023	Down	-5.60979	-3.73858	-5.61217	-4.02439	-3.67039	-5.34265	-2.36657	-3.53146	-3.5166	-6.87148	-3.58371	-3.01494
ENSG00000221947	389668	XKR9	-3.0886	Down	-2.58831	-2.87061	-3.46728	-1.95893	-1.84009	-2.49931	-3.85628	-3.13294	-3.34311	-4.22793	-3.74762	-3.53083
ENSG00000221988	9374	PPT2	3.27892	Up	3.37505	3.33285	3.56808	3.8975	2.86992	3.27566	3.07041	2.89464	3.29339	3.24818	3.71859	2.8028
ENSG00000223609	3045	HBD	8.065	Up	8.74359	6.34542	8.6748	7.9116	9.23839	8.23943	7.98846	7.42601	7.59619	7.58444	8.65822	8.37346
ENSG00000223806	400866	LINC00114	5.30346	Up	5.47411	5.09537	7.42724	2.62719	4.69826	6.54842	7.51975	3.28903	5.33517	3.96426	3.93475	7.728
ENSG00000224137	102724714	LINC01857	-4.36273	Down	-4.42299	-4.27796	-4.65777	-4.56614	-4.5301	-2.99278	-4.20706	-4.64087	-4.34554	-4.36567	-4.27282	-5.07303
ENSG00000224521	105373277	LOC105373277	-2.02975	Down	-1.97945	-2.00559	-2.05569	-2.08199	-2.03096	-1.95744	-2.03121	-2.08238	-2.08047	-2.05103	-2.06071	-1.94006
ENSG00000224631	643358	RPS27AP16	-2.36917	Down	-2.68087	-2.3566	-2.66523	-1.79939	-2.43993	-2.53846	-1.72893	-2.06178	-2.09039	-4.20315	-1.65905	-2.20623
ENSG00000224940	401399	PRRT4	3.1751	Up	3.84098	2.62882	3.54954	4.36864	3.55081	3.24261	1.75324	2.34287	2.39693	3.21203	4.4315	2.78317
ENSG00000225528	112268293	TMA7B	-2.99625	Down	-2.39005	-3.22695	-2.74219	-3.45852	-3.00568	-3.30217	-3.30583	-2.83951	-2.61953	-3.62004	-2.7852	-2.65933
ENSG00000225573	441246	RPL35P5	-3.42293	Down	-4.80099	-2.8766	-5.04938	-3.59854	-2.96449	-4.66511	-1.88646	-2.71625	-2.73342	-4.46801	-2.96162	-2.35433
ENSG00000226167	100287722	AP4B1-AS1	-2.31323	Down	-2.86119	-2.12949	-2.06671	-2.35829	-2.15049	-2.25726	-2.13027	-2.23313	-2.16079	-2.97862	-2.27291	-2.15957
ENSG00000226240	100874151	LINC00381	-2.59238	Down	-2.53892	-2.55788	-2.73401	-2.68832	-2.49838	-2.36713	-2.61785	-2.73381	-2.57884	-2.60083	-2.56341	-2.62922
ENSG00000226457	729662	RPL22P3	-2.26333	Down	-3.13653	-1.96591	-2.49246	-2.34737	-2.11931	-2.73206	-1.68079	-2.01043	-2.12576	-2.93266	-1.71119	-1.90544
ENSG00000226508	105373984	LINC01918	-2.90562	Down	-3.24656	-2.84087	-3.26242	-1.9322	-2.93809	-2.56472	-3.10894	-2.9143	-3.15943	-2.66737	-3.15724	-3.07534
ENSG00000226674	401014	TEX41	4.03311	Up	3.52919	2.72574	3.74804	2.78348	3.53415	4.58801	6.08372	4.78852	5.59575	3.6106	2.13901	5.27115
ENSG00000226715	105378872	LINC01709	-2.2706	Down	-2.40889	-2.72468	-2.30464	-1.77939	-2.29882	-2.43955	-1.60828	-2.45556	-1.90954	-3.6051	-1.74248	-1.97029
ENSG00000227028	100128590	SLC8A1-AS1	3.9953	Up	2.94244	4.29308	6.43388	2.69743	4.51327	5.10718	4.22104	3.3283	4.15353	3.17456	1.94966	5.12921
ENSG00000227311	388621	RPL21P20	-3.50833	Down	-4.3975	-3.19029	-3.90722	-4.00199	-2.99069	-4.40197	-1.95191	-2.6884	-3.51594	-5.16393	-3.36814	-2.52192
ENSG00000227373	102724601	RABGAP1L-DT	-2.37107	Down	-2.81176	-1.953	-2.37863	-2.63587	-2.86151	-2.40926	-1.67223	-2.62983	-2.39803	-1.90098	-2.58229	-2.21942
ENSG00000227399	650059	RPL21P82	-2.24636	Down	-2.779	-2.35004	-2.48609	-2.26877	-2.27647	-2.47939	-1.6395	-2.1756	-2.15638	-2.779	-1.89782	-1.66821
ENSG00000227591	101930114	HSD11B1-AS1	-1.92933	Down	-1.79127	-1.7897	-1.97294	-2.0803	-2.10353	-2.05715	-1.76107	-2.02915	-1.62977	-1.86971	-1.89195	-2.17542
ENSG00000228053	100131672	RPL21P87	-2.48695	Down	-3.25468	-2.3938	-2.65626	-2.73276	-2.33918	-2.9739	-1.73871	-2.16034	-2.08506	-2.98902	-2.42668	-2.09305
ENSG00000228224	83955	NACA4P	-3.73879	Down	-5.3967	-3.24167	-4.82166	-4.20552	-3.11643	-4.61714	-1.64161	-2.6494	-3.14786	-6.23381	-3.4546	-2.33912
ENSG00000228526	106614088	MIR34AHG	2.89073	Up	2.65727	3.34402	3.39046	3.41926	3.03237	2.51652	2.81812	2.80795	2.43686	2.70635	2.72352	2.83609
ENSG00000228727	401251	SAPCD1	2.29292	Up	3.43178	1.90843	2.72343	2.04957	2.04247	1.84624	1.51047	3.04663	2.45566	2.23727	1.76361	2.49946
ENSG00000228861	391282	RPL23AP12	-2.76338	Down	-3.54443	-2.34329	-2.962	-3.06374	-2.76678	-3.31873	-1.53482	-2.6814	-2.75733	-3.47827	-2.93045	-1.77935
ENSG00000228887	126037	EEF1DP1	-2.69382	Down	-3.14399	-2.75614	-3.08583	-3.0572	-2.59548	-3.28354	-1.51009	-2.25846	-2.13774	-3.60284	-2.59883	-2.29572
ENSG00000229133	149224	RPS7P4	-3.20577	Down	-4.6416	-2.74208	-4.01589	-3.48089	-2.78498	-3.96332	-1.61119	-2.55143	-2.77669	-4.83411	-2.97284	-2.09421
ENSG00000229168	392451	RPL19P20	-3.56028	Down	-4.93298	-3.11203	-4.17064	-3.81432	-3.23301	-4.42282	-1.61895	-3.06424	-3.46409	-4.93298	-3.29854	-2.65876
ENSG00000229503	100129141	RPL21P37	-3.56612	Down	-5.13289	-3.47556	-4.02229	-3.88442	-3.06742	-3.97285	-2.23967	-3.07069	-3.47363	-4.59928	-3.23574	-2.61897
ENSG00000229605	653665	RPL21P93	-2.59929	Down	-2.44621	-3.21037	-3.00235	-2.16615	-2.67092	-2.7279	-2.47887	-2.01151	-1.99804	-4.06665	-1.93923	-2.47325
ENSG00000230207	158345	RPL4P5	-2.3876	Down	-2.60042	-2.40048	-3.38187	-2.14959	-2.17428	-3.09669	-1.52867	-1.61245	-1.77596	-4.30524	-1.97121	-1.65439
ENSG00000230317	101926971	LINC01284	-3.5284	Down	-3.58975	-3.68868	-3.67506	-3.38244	-3.31466	-3.04477	-3.60747	-3.67777	-3.75963	-3.30719	-3.61698	-3.67638
ENSG00000230592	643617	RPSAP8	-2.48252	Down	-3.23871	-2.63422	-2.50835	-2.71684	-2.22041	-2.83121	-1.74157	-1.9807	-1.66655	-3.98615	-2.20244	-2.06304
ENSG00000230629	653658	RPS23P8	-3.18613	Down	-3.82893	-2.6141	-4.01375	-2.75569	-2.90081	-3.91906	-2.05488	-3.08745	-2.47994	-5.77575	-2.46375	-2.33943
ENSG00000230649	105375523	LOC105375523	-3.66847	Down	-3.30927	-3.09138	-3.39821	-3.95459	-4.23908	-3.85889	-3.4724	-3.84493	-3.11517	-3.98515	-4.00613	-3.74644
ENSG00000230701	26226	FBXW4P1	2.90243	Up	3.0691	1.81941	3.43624	3.31357	2.76241	2.69717	1.7689	3.36447	2.63371	4.10296	3.02138	2.83988
ENSG00000230825	101927354	LINC03016	-2.3001	Down	-2.88466	-2.48632	-2.64502	-2.48188	-2.57101	-1.8463	-1.82427	-1.94176	-2.37962	-2.02564	-2.21353	-2.30121
ENSG00000231105	100506801	ECE1-AS1	-2.82799	Down	-3.13079	-2.85815	-2.19169	-3.04915	-3.3685	-2.37287	-2.74472	-3.82041	-2.63415	-1.94595	-2.62065	-3.19887
ENSG00000231621	101927596	ANKRD44-AS1	-3.47164	Down	-3.67558	-2.84325	-2.68302	-3.77455	-3.60164	-3.27254	-3.60949	-3.79333	-2.94805	-4.1063	-3.40363	-3.94829
ENSG00000231682	105373934	LINC01891	-2.94308	Down	-2.93847	-3.03591	-2.98515	-3.10387	-2.61537	-2.45248	-2.73329	-3.04947	-3.01587	-3.11769	-3.02116	-3.24821
ENSG00000231767	100271374	RPS27AP5	-2.50249	Down	-2.71272	-2.56424	-2.97065	-2.51452	-2.6164	-3.10462	-1.89791	-1.95914	-1.70955	-4.00006	-2.11631	-1.86371
ENSG00000232004	399748	CAP1P2	-2.65576	Down	-3.91725	-1.54412	-3.07746	-3.21136	-2.45784	-2.84266	-1.64203	-1.95984	-2.32547	-3.60371	-2.94514	-2.34219
ENSG00000232037	440575	RPL21P29	-2.74259	Down	-3.41014	-2.38881	-3.07379	-2.90961	-2.85286	-3.29904	-1.98893	-2.35095	-2.71559	-3.59831	-2.08449	-2.23857
ENSG00000232134	100129243	RPS15AP12	-4.70099	Down	-6.84339	-3.83047	-5.58642	-5.18161	-4.01764	-5.74812	-2.22038	-3.93982	-4.26852	-7.01362	-4.36764	-3.39425
ENSG00000232176	100270865	RPS6P10	-3.1787	Down	-3.74497	-3.84105	-3.7214	-2.60738	-3.17762	-4.01735	-1.68472	-3.08661	-3.31966	-4.14147	-2.35966	-2.44252
ENSG00000232442	100505771	MHENCR	-2.87031	Down	-3.7453	-2.1835	-2.45575	-2.28512	-3.57961	-2.3014	-2.32718	-4.32249	-2.70918	-2.83561	-2.09883	-3.59977
ENSG00000232472	644820	EEF1B2P3	-4.16469	Down	-5.94303	-3.4755	-5.31078	-4.03896	-3.9359	-5.7375	-2.11276	-3.27881	-3.4026	-6.69093	-3.26128	-2.7882
ENSG00000232587	100421865	EEF1A1P3	2.17872	Up	2.01603	2.24736	2.24378	2.20549	1.86774	1.9309	2.19305	2.68455	1.99948	1.91114	2.35586	2.48932
ENSG00000232858	651249	RPL34P27	-3.36748	Down	-4.77394	-3.0783	-3.82527	-3.55075	-3.11398	-4.05156	-1.5539	-2.62211	-3.32082	-4.85848	-2.98516	-2.67544
ENSG00000233008	101927560	LOC101927560	-4.01501	Down	-4.16558	-3.92633	-4.43016	-2.87604	-4.27243	-3.64982	-4.08347	-3.57535	-4.22754	-4.34998	-4.19287	-4.43058
ENSG00000233093	100128420	LINC00892	-3.38905	Down	-3.51535	-3.14076	-2.92674	-3.70551	-3.44569	-3.04919	-3.332	-3.56948	-3.30756	-3.38902	-3.66844	-3.61893
ENSG00000233167	100128637	EEF1A1P26	-2.33251	Down	-2.82281	-2.32979	-2.32821	-2.4339	-2.30823	-2.59602	-1.72452	-2.09199	-2.24694	-2.82281	-2.09052	-2.19438
ENSG00000233254	728782	RPL21P134	-2.66391	Down	-3.79994	-2.58611	-3.09699	-3.0868	-2.65343	-3.43162	-1.87516	-2.82322	-1.77199	-2.31756	-2.44606	-2.07803
ENSG00000233266	100873894	HMGB1P31	-2.7005	Down	-3.86564	-1.94135	-3.08837	-3.40551	-2.59003	-2.98185	-1.63461	-2.44425	-2.57979	-3.46208	-2.85313	-1.55939
ENSG00000233276	2876	GPX1	2.45471	Up	2.66885	2.81402	3.08774	2.26989	1.83691	2.3146	2.12582	2.78309	2.44633	2.12189	3.40204	1.58536
ENSG00000233429	100506311	HOTAIRM1	-3.87925	Down	-4.28302	-3.50547	-4.71285	-2.65045	-3.17276	-3.25317	-5.4375	-3.15912	-3.1793	-4.34354	-3.73835	-5.11547
ENSG00000233452	729178	STXBP5-AS1	-3.1692	Down	-4.06724	-2.55222	-3.44626	-3.23502	-2.33777	-3.22931	-2.35668	-2.52631	-3.7369	-3.24654	-3.07149	-4.22466
ENSG00000233680	664721	HNRNPA1P27	-2.70292	Down	-2.94766	-2.76737	-3.4182	-3.24551	-2.08024	-3.14321	-1.51461	-2.4056	-2.42049	-4.11578	-2.60093	-1.77539
ENSG00000233730	105378916	LINC01765	-2.7641	Down	-3.15497	-2.56159	-2.85316	-2.47251	-3.06149	-2.86387	-3.12518	-1.96981	-2.42075	-3.24642	-2.62618	-2.8133
ENSG00000233930	338651	KRTAP5-AS1	-3.1134	Down	-2.43793	-2.76076	-3.08734	-2.9604	-3.15325	-3.04523	-3.56501	-3.64367	-3.62714	-2.41829	-3.62146	-3.04033
ENSG00000234093	644790	RPS15AP11	-2.18061	Down	-2.2777	-2.2293	-2.50885	-2.12194	-2.40501	-2.40324	-1.60033	-2.05709	-1.74813	-3.11682	-1.65597	-2.0429
ENSG00000234498	387841	RPL13AP20	-3.23018	Down	-4.53664	-3.29954	-3.5705	-3.73696	-2.52259	-4.31392	-1.87118	-2.47175	-2.31172	-4.67835	-3.35063	-2.09835
ENSG00000234807	101926907	LOC101926907	-3.54568	Down	-4.09608	-3.54144	-3.29079	-3.30781	-3.50014	-2.5817	-4.16085	-3.99693	-3.49307	-3.3099	-3.38206	-3.88742
ENSG00000235225	653773	RPL31P17	-3.15047	Down	-4.58841	-2.69856	-3.56206	-3.13425	-3.05339	-3.6531	-1.55803	-3.00666	-2.96383	-4.65954	-2.62504	-2.30279
ENSG00000235531	100132891	MSC-AS1	-4.35388	Down	-4.22937	-4.40893	-3.22582	-4.74654	-4.27941	-4.11949	-4.82085	-4.92044	-4.09982	-4.60975	-4.4413	-4.34481
ENSG00000235532	100507612	LINC00402	-4.8243	Down	-4.88314	-4.32858	-4.97692	-4.91481	-4.47151	-3.71223	-4.14376	-5.94115	-4.51515	-5.91806	-4.46561	-5.62062
ENSG00000236191	728774	RPS15AP25	-2.31074	Down	-2.98243	-1.98545	-2.35617	-2.51915	-2.25852	-2.69258	-1.64849	-1.95371	-2.27792	-2.98243	-2.06466	-2.00739
ENSG00000236297	100421815	EEF1A1P23	-2.45876	Down	-3.6162	-2.02482	-2.56954	-2.20489	-2.87321	-2.91493	-1.66775	-2.42074	-2.21045	-2.86923	-2.44835	-1.68498
ENSG00000236330	100270832	RPL5P9	-2.91695	Down	-4.54896	-2.65015	-3.32463	-2.96022	-2.56894	-3.41269	-1.69462	-2.20363	-2.61966	-4.24553	-2.54316	-2.23118
ENSG00000236824	618	BCYRN1	3.18544	Up	2.68005	3.85592	3.61483	3.74503	2.04107	2.54413	3.74233	2.47071	3.16037	3.2343	4.14281	2.99377
ENSG00000237248	100499405	LINC00987	-3.2994	Down	-4.38489	-2.37095	-3.39409	-3.4952	-3.54989	-3.54498	-2.90007	-3.49197	-2.9019	-3.37564	-3.42917	-2.75399
ENSG00000237471	102723446	LOC102723446	-4.4924	Down	-4.8716	-4.73001	-4.85321	-3.05217	-4.73133	-4.64205	-4.66053	-4.90901	-4.62742	-5.29037	-3.33708	-4.20404
ENSG00000237649	3833	KIFC1	3.02139	Up	2.82741	2.35971	3.12012	2.79352	3.7086	2.9586	3.05078	2.41428	3.29884	4.33512	2.76439	2.62527
ENSG00000237773	101927609	LOC101927609	-2.91522	Down	-3.17272	-1.856	-2.23698	-3.9452	-3.92676	-2.55645	-2.17725	-2.73036	-2.83601	-3.63866	-2.9617	-2.94449
ENSG00000237819	101927497	CDK6-AS1	4.93791	Up	4.39349	6.75452	5.38827	4.48587	3.53536	4.40534	5.81845	5.62846	6.02672	3.22868	5.51811	4.07171
ENSG00000238961	677828	SNORA47	4.51698	Up	6.22105	4.46982	4.98653	6.03315	2.95077	5.08858	2.92329	3.56423	3.96126	6.73559	4.71004	2.55945
ENSG00000239039	692084	SNORD13	5.10511	Up	8.32506	3.99464	6.71244	6.22215	4.08984	5.66372	2.40299	4.48746	4.01763	6.1651	5.599	3.58123
ENSG00000239198	389644	RPL5P22	-4.10887	Down	-5.88448	-3.32329	-5.14924	-4.4144	-3.61117	-4.95101	-1.99341	-3.52517	-3.92902	-6.17544	-3.58781	-2.76199
ENSG00000239219	100128164	FHL1P1	-2.39486	Down	-3.04123	-2.46709	-1.81849	-3.11229	-2.11575	-2.34115	-1.87445	-3.19186	-1.84345	-1.66724	-2.38632	-2.87899
ENSG00000239269	145259	RPSAP4	-2.20053	Down	-2.93016	-2.17814	-2.21542	-2.45332	-2.00479	-2.37643	-1.5303	-1.83182	-1.78086	-2.92527	-2.00457	-2.17531
ENSG00000239388	142686	ASB14	-2.25864	Down	-3.00885	-2.39742	-2.43222	-2.49138	-2.33037	-2.32134	-1.50157	-1.94298	-1.8001	-3.06443	-1.84449	-1.96853
ENSG00000239470	387753	RPL21P97	-3.03535	Down	-3.58223	-2.78515	-3.57609	-3.03533	-2.96339	-3.80132	-1.94066	-2.78004	-2.42199	-4.06364	-2.71022	-2.7641
ENSG00000239532	727821	RPL21P45	-2.70107	Down	-3.19123	-2.67103	-2.72793	-2.74712	-2.65745	-3.0415	-2.33216	-2.65679	-2.6129	-3.1154	-2.47752	-2.18178
ENSG00000239697	8742	TNFSF12	-3.35919	Down	-2.49429	-3.33105	-2.58965	-4.62029	-3.72376	-2.77605	-3.54769	-3.13469	-3.7698	-3.68058	-3.23092	-3.41155
ENSG00000239839	1668	DEFA3	5.28558	Up	4.36163	5.97307	5.67472	5.5383	5.58249	3.58029	5.42519	6.284	4.67043	5.55307	5.53357	5.25025
ENSG00000239998	11027	LILRA2	6.47479	Up	6.5392	6.11036	7.11016	5.21664	6.92399	7.22447	6.66808	6.21255	6.47935	6.18891	6.04451	6.97928
ENSG00000240366	441727	RPL36AP45	-3.67673	Down	-5.23007	-3.04002	-4.18256	-4.05628	-3.54843	-4.41579	-1.50465	-3.40629	-3.46409	-4.98339	-3.4011	-2.88805
ENSG00000240583	358	AQP1	4.33876	Up	4.08332	3.77445	4.53444	4.24321	4.96077	3.79219	4.36607	3.88892	4.11597	4.86863	5.54244	3.89469
ENSG00000240674	100271169	RPL21P51	-2.33797	Down	-2.44545	-2.13014	-2.79243	-2.37691	-2.14295	-2.77224	-1.95717	-2.05334	-2.24741	-3.18807	-2.0582	-1.89127
ENSG00000240764	56097	PCDHGC5	3.72673	Up	3.59653	2.72184	3.05579	3.42233	3.43263	3.0167	4.23888	6.28927	3.56418	2.00622	4.12176	5.25462
ENSG00000241316	101927111	SUCLG2-DT	-4.22439	Down	-4.81381	-3.94119	-4.51384	-3.86211	-4.14622	-3.26023	-4.15271	-4.62448	-3.9584	-3.61566	-5.02756	-4.77645
ENSG00000241511	648729	RPS15AP24	-2.97101	Down	-3.65538	-3.02468	-3.72337	-3.41132	-2.77544	-3.31808	-1.73778	-2.75111	-2.53628	-3.54686	-2.64692	-2.52491
ENSG00000241560	100131117	ZBTB20-AS1	-2.61366	Down	-2.82027	-2.52848	-2.618	-2.53916	-2.71047	-2.49761	-2.45362	-3.02476	-2.60412	-2.95964	-2.25662	-2.35122
ENSG00000241612	645174	RPL21P46	-3.03519	Down	-4.18811	-3.05418	-3.40189	-3.04541	-2.98376	-3.2389	-2.28849	-2.51731	-2.04132	-4.26158	-2.64862	-2.75271
ENSG00000241739	100271171	RPL21P56	-2.4426	Down	-2.84957	-2.24277	-2.47451	-2.59529	-2.39794	-2.69717	-2.09218	-2.23556	-2.30922	-2.92188	-2.22201	-2.27315
ENSG00000241741	441034	RPL7AP30	-2.39159	Down	-2.86662	-2.01674	-3.08644	-2.07597	-2.42229	-2.74178	-1.5277	-2.23666	-1.75539	-3.87375	-2.06022	-2.03558
ENSG00000242276	400385	RPL5P3	-2.48612	Down	-3.34052	-2.59217	-2.79964	-2.66173	-2.22894	-3.03861	-1.65478	-2.03324	-2.10934	-3.17069	-2.16442	-2.03942
ENSG00000242419	56098	PCDHGC4	4.12455	Up	3.84883	2.92527	3.71829	3.46352	3.74417	3.37244	4.81633	6.94237	4.05821	2.85714	4.19324	5.55476
ENSG00000242445	728992	RPL7AP11	-2.79862	Down	-3.2664	-2.61211	-3.61655	-3.11755	-2.54118	-3.07985	-1.66364	-2.47925	-2.26402	-4.37346	-2.7396	-1.82982
ENSG00000242571	157206	RPL21P11	-2.76496	Down	-3.30261	-2.67164	-3.11249	-3.13789	-2.39585	-3.55519	-2.03996	-1.7007	-2.62638	-4.06947	-2.45461	-2.11269
ENSG00000242692	103911	RPS27AP1	-3.48129	Down	-4.81877	-3.07944	-3.89581	-3.76126	-3.09912	-3.92253	-2.04101	-2.85	-3.47153	-4.81877	-3.20825	-2.80905
ENSG00000242697	100270833	RPL5P12	-3.04803	Down	-4.2217	-2.16739	-3.91132	-3.09644	-2.77757	-4.23749	-1.60684	-2.81158	-2.69584	-4.15581	-2.57701	-2.31738
ENSG00000242747	729208	RPL21P14	-2.84036	Down	-3.3294	-2.66697	-3.34564	-3.0772	-3.10052	-3.43907	-2.04336	-2.16992	-2.17867	-3.76499	-2.54614	-2.42247
ENSG00000242757	100128258	RPS18P3	-1.68024	Down	-1.81111	-1.74357	-1.64906	-1.708	-1.60439	-1.75127	-1.50088	-1.67574	-1.60556	-1.81111	-1.60151	-1.70066
ENSG00000242858	100271278	RPL13AP14	-2.79356	Down	-4.08202	-2.78429	-3.21999	-3.09685	-2.65484	-3.10096	-1.69411	-2.32597	-2.43285	-3.6697	-2.48595	-1.97523
ENSG00000243071	653079	RPL21P98	-3.02243	Down	-3.32851	-3.27889	-3.66197	-2.76257	-3.08467	-3.63763	-2.16506	-2.42772	-2.3219	-4.67241	-2.74716	-2.1807
ENSG00000243175	100128888	RPSAP36	4.23198	Up	4.49123	5.21137	5.70916	3.21132	5.1535	4.76863	4.13959	4.45679	4.27906	1.95861	2.35098	5.05356
ENSG00000243181	100133273	RPL21P80	-4.26893	Down	-6.04345	-3.90565	-5.21685	-4.48702	-3.67393	-5.12232	-2.31671	-3.45346	-3.45572	-6.63054	-3.98715	-2.93441
ENSG00000243417	391706	RPS3AP18	-2.42066	Down	-2.44781	-2.43996	-2.00366	-2.70137	-2.49906	-2.42462	-2.0299	-2.43534	-2.56869	-2.77643	-2.34972	-2.37134
ENSG00000243478	344454	AOX2P	6.83198	Up	5.5099	8.30124	7.2245	7.12889	6.16791	7.50488	6.99485	4.96793	6.81941	7.77459	6.60324	6.98638
ENSG00000243554	110440226	CCZ1P1	-2.32046	Down	-2.45022	-2.47636	-2.78239	-2.04157	-2.50989	-2.7522	-2.0163	-1.63915	-1.76288	-3.01886	-2.80297	-1.59268
ENSG00000243761	100131339	RPL32P4	-2.17819	Down	-2.62083	-1.79636	-2.28737	-2.24911	-2.16634	-2.53926	-1.67009	-2.15954	-2.14068	-2.62083	-1.938	-1.94987
ENSG00000243859	100270839	RPL5P17	-3.29977	Down	-4.29225	-2.98719	-3.80206	-2.91764	-3.02628	-4.23315	-1.60447	-2.55781	-3.13573	-5.31016	-2.93085	-2.79961
ENSG00000243894	727951	RPS3AP16	-2.42049	Down	-2.86338	-2.29924	-2.39746	-2.35357	-2.37106	-2.80681	-1.88502	-2.57257	-2.55468	-2.49345	-2.34266	-2.10603
ENSG00000244018	100271007	RPL35P6	2.98057	Up	2.59316	3.60586	2.6493	2.54774	3.58941	3.28836	3.51405	2.17379	2.97102	2.94973	2.59134	3.29308
ENSG00000244021	653156	RPL21P53	-3.32617	Down	-3.95459	-3.59178	-3.70434	-3.56997	-3.03535	-3.66477	-2.59204	-2.69342	-2.93344	-4.65859	-3.43614	-2.07955
ENSG00000244405	2119	ETV5	6.06459	Up	6.1081	6.47898	4.65696	6.07427	6.29603	6.78693	6.38067	4.00799	6.44394	7.16212	6.02979	6.34929
ENSG00000244582	731688	RPL21P120	-3.19799	Down	-3.55707	-3.74614	-3.44094	-3.10369	-3.01791	-3.6089	-2.3176	-2.6987	-2.72318	-4.09869	-3.08707	-2.97595
ENSG00000244734	3043	HBB	6.83028	Up	8.85243	4.60924	7.3758	6.57982	7.84479	7.50463	5.97882	6.34022	6.0453	7.0097	7.02662	6.79595
ENSG00000245571	101927204	FAM111A-DT	-2.76699	Down	-3.67426	-1.89421	-2.42265	-2.54714	-3.30412	-2.66249	-2.02568	-3.69295	-2.29735	-2.97938	-2.58568	-3.118
ENSG00000246366	286190	LACTB2-AS1	-3.97234	Down	-3.84376	-4.32963	-3.9379	-3.47515	-4.22262	-3.2853	-4.3069	-4.1339	-3.93188	-3.4317	-4.53619	-4.23314
ENSG00000247134	105379362	LOC105379362	-3.72042	Down	-3.97062	-3.09309	-3.06404	-3.06551	-3.83048	-3.35016	-3.99175	-4.72913	-2.62372	-4.72508	-4.26229	-3.93913
ENSG00000247498	100506314	GPRC5D-AS1	-4.1788	Down	-5.33968	-3.63189	-4.24304	-4.26188	-3.41506	-4.03707	-3.35112	-4.62085	-4.08572	-4.20444	-4.82558	-4.12923
ENSG00000247774	100233209	PCED1B-AS1	-4.38401	Down	-4.7744	-4.10206	-4.34861	-5.04028	-4.58344	-3.06316	-3.94503	-4.98218	-4.52465	-3.60597	-5.11896	-4.51943
ENSG00000247796	257396	MOCS2-DT	-3.2018	Down	-3.6443	-2.12533	-3.34567	-3.49537	-3.48763	-3.08058	-2.66267	-3.79813	-2.5745	-4.06394	-3.39311	-2.75036
ENSG00000248871	407977	TNFSF12-TNFSF13	-3.61807	Down	-3.29497	-3.27109	-4.1772	-4.74722	-3.51987	-3.8007	-2.66262	-3.6243	-4.00384	-4.82861	-2.87281	-2.61357
ENSG00000249784	677770	SCARNA22	5.43366	Up	8.24779	5.11701	7.5673	6.22465	3.83864	5.78422	4.33801	5.30054	5.13941	4.56252	5.81481	3.26898
ENSG00000250334	100506035	LINC00989	-2.87558	Down	-2.18772	-2.91936	-2.53876	-2.63426	-2.9243	-2.9674	-3.0502	-3.37498	-2.94118	-3.41047	-2.36056	-3.19778
ENSG00000250361	2994	GYPB	3.70308	Up	3.87332	2.18493	3.80037	3.13005	4.96831	3.48997	3.99098	3.36773	3.28212	3.87556	4.03572	4.43792
ENSG00000250486	152756	FAM218A	-4.4583	Down	-3.78529	-4.67452	-4.83927	-3.85511	-4.55879	-4.07819	-4.67583	-4.76881	-4.60119	-4.31878	-4.83296	-4.51091
ENSG00000250492	285634	INTS6P1	-2.34161	Down	-3.27285	-2.34432	-2.19851	-2.53926	-2.0528	-2.50157	-1.6107	-1.97199	-2.02014	-2.81942	-2.43434	-2.33345
ENSG00000251322	85358	SHANK3	8.93609	Up	9.99862	10.1532	10.102	10.1747	10.9644	10.1669	9.09939	4.45	7.3898	3.06735	10.906	10.7608
ENSG00000251869	677773	SCARNA23	2.76675	Up	4.58416	2.78858	3.4473	2.56581	1.78147	2.22127	2.70895	2.88132	2.53356	2.42811	2.74842	2.51204
ENSG00000253309	647174	SERPINE3	-2.17768	Down	-2.44728	-2.25077	-2.00593	-2.29893	-2.13348	-2.28385	-1.79651	-2.25884	-2.09235	-2.30237	-2.17542	-2.08637
ENSG00000253438	100750225	PCAT1	-4.22404	Down	-4.20269	-3.74889	-4.26138	-4.49091	-4.22772	-3.75199	-2.813	-5.71279	-4.29836	-4.7697	-4.26297	-4.14815
ENSG00000253506	342538	NACA2	-2.41742	Down	-3.6354	-2.2373	-3.13737	-2.38404	-2.00788	-2.62	-1.53971	-1.67455	-1.88655	-3.93309	-2.09867	-1.8545
ENSG00000253837	100507156	LOXL2-AS1	3.41743	Up	2.66848	4.37594	4.98084	2.8425	2.87753	3.60023	4.73646	2.11432	3.14846	2.29107	4.48575	2.88763
ENSG00000253873	56105	PCDHGA11	4.51262	Up	4.23338	2.70559	3.77507	5.12613	5.02781	4.56302	5.35944	4.89152	4.17604	2.18898	5.7154	6.3891
ENSG00000254266	101927003	PKIA-AS1	-1.93293	Down	-1.81849	-2.02451	-2.06405	-1.7511	-1.90333	-1.93009	-1.8482	-2.03827	-1.94328	-2.1015	-1.96504	-1.80727
ENSG00000254363	101929719	LOC101929719	-2.93583	Down	-3.21987	-2.43608	-2.90589	-2.4445	-3.3396	-2.55554	-3.15784	-3.38405	-3.11913	-2.41509	-2.90077	-3.35154
ENSG00000254427	101928812	LINC02696	-3.24279	Down	-3.25752	-3.2361	-3.47033	-3.1854	-3.13759	-2.8525	-3.25042	-3.09663	-3.22688	-3.53653	-3.34168	-3.32188
ENSG00000254726	92312	MEX3A	3.98844	Up	2.22483	2.72048	2.73373	5.84341	5.4005	4.33462	4.34475	2.60478	4.74961	5.821	3.93157	3.15196
ENSG00000254838	387751	GVINP1	-3.45819	Down	-3.81663	-2.56565	-2.6616	-3.63226	-3.55507	-3.26136	-3.1227	-4.06226	-3.3797	-4.66153	-3.73562	-3.04389
ENSG00000254876	100499484	SUGT1P4-STRA6LP	-3.01006	Down	-3.44292	-2.50975	-3.43731	-1.64991	-2.9303	-2.08563	-3.16361	-4.51878	-2.42927	-3.50172	-3.69241	-2.75912
ENSG00000254965	106481729	C1DP5	-4.20819	Down	-4.55359	-3.9053	-4.13394	-3.98042	-4.57398	-4.02209	-3.86906	-4.69965	-3.5323	-5.48031	-3.85988	-3.88782
ENSG00000255002	100128233	LINC02324	-3.34541	Down	-3.47617	-3.54117	-2.95543	-3.67613	-3.5832	-2.86061	-3.25083	-3.78791	-2.79144	-3.79896	-3.29536	-3.12774
ENSG00000255274	100526771	SMIM35	-3.55199	Down	-4.10574	-2.42003	-3.60404	-4.18414	-4.24726	-3.71613	-2.31052	-3.30703	-3.27421	-3.52654	-3.79609	-4.1322
ENSG00000255398	8843	HCAR3	3.66284	Up	4.7731	3.45631	4.10482	2.01735	2.96417	3.69481	5.43878	3.29354	2.79958	2.36663	5.97735	3.06764
ENSG00000255571	254559	MIR9-3HG	-3.8367	Down	-4.14605	-3.85376	-3.61497	-4.08381	-4.14049	-3.37721	-3.94071	-3.61101	-3.58011	-4.03594	-3.27595	-4.38045
ENSG00000255733	100885789	IFNG-AS1	-4.86753	Down	-6.16029	-3.00817	-4.83137	-6.71864	-3.39094	-3.40344	-3.70964	-6.78126	-5.09372	-6.34905	-5.84996	-3.11389
ENSG00000256235	85027	SMIM3	6.47458	Up	6.79443	6.67969	7.3794	5.90772	5.65084	7.04169	6.30022	6.83664	6.39577	6.14692	6.94538	5.61622
ENSG00000256338	22970	RPL41P2	-2.97898	Down	-4.2685	-2.15403	-3.31753	-2.61338	-2.69255	-3.04532	-1.53747	-3.34089	-2.78036	-4.88301	-2.48586	-2.62886
ENSG00000257127	574028	CLLU1	-1.71283	Down	-1.74135	-1.83423	-1.57993	-1.68895	-1.76922	-1.67715	-1.69412	-1.61746	-1.67282	-1.83423	-1.69303	-1.75148
ENSG00000257285	101926933	PRMT5-DT	-3.06432	Down	-3.77778	-3.23017	-3.18948	-3.26326	-3.42996	-3.35272	-2.10434	-3.16263	-2.37464	-2.47393	-3.00744	-3.40549
ENSG00000257335	8972	MGAM	2.53042	Up	3.19931	3.16922	2.82044	2.04137	2.19612	1.91261	2.18737	2.881	2.35217	2.30679	3.00294	2.29574
ENSG00000257923	1523	CUX1	2.52565	Up	2.1383	2.12872	2.23085	2.84895	3.01853	2.63462	1.89979	2.63253	2.56144	3.20015	2.53317	2.48077
ENSG00000258476	101927153	LINC02207	4.08312	Up	2.43578	3.71296	3.88712	3.68049	4.04046	5.2414	4.31646	4.23308	4.52607	4.67999	4.35356	3.89013
ENSG00000258689	103695436	LINC01269	-1.76821	Down	-1.74951	-1.67555	-1.83402	-1.8205	-1.71077	-1.73263	-1.78055	-1.85243	-1.79427	-1.58789	-1.83568	-1.84474
ENSG00000258733	101928767	LINC02328	-3.58095	Down	-4.7524	-2.92004	-3.82517	-1.83223	-3.175	-2.63299	-2.99665	-5.29546	-4.35696	-4.94202	-2.12291	-4.11959
ENSG00000258867	283587	HISLA	-2.66218	Down	-2.88812	-2.14838	-2.39574	-3.30103	-3.15152	-2.09351	-2.27594	-2.48366	-2.406	-2.51724	-3.46721	-2.8178
ENSG00000259024	100533496	TVP23C-CDRT4	-3.76635	Down	-3.45976	-3.46674	-3.75466	-2.15452	-3.94042	-4.22677	-4.66705	-4.34897	-4.04482	-1.92699	-5.22231	-3.98323
ENSG00000260027	3217	HOXB7	-3.48067	Down	-3.66413	-3.24396	-3.68541	-2.21881	-3.65359	-3.59075	-3.85297	-3.82011	-2.78475	-3.64441	-3.78567	-3.82346
ENSG00000260231	100134229	KDM7A-DT	-2.58453	Down	-3.20725	-2.22895	-2.12444	-1.70427	-2.619	-1.94952	-2.18485	-4.37817	-2.93337	-2.71103	-1.88912	-3.08437
ENSG00000260386	149086	LDC1P	5.08473	Up	3.8301	4.33502	5.51926	6.23712	1.86463	3.5454	5.43411	6.70394	6.73516	8.00405	3.49157	5.31636
ENSG00000260628	388248	LOC388248	2.68156	Up	1.72595	2.95116	2.09293	2.06536	3.36294	2.42575	3.36204	3.8521	2.37164	2.36524	2.28354	3.32003
ENSG00000261645	101929222	DISC1FP1	-3.27194	Down	-3.25701	-3.25513	-3.40968	-3.18881	-3.07451	-3.31065	-3.24576	-3.34237	-3.41803	-3.38163	-3.13123	-3.2485
ENSG00000263417	220158	GTSCR1	-2.95763	Down	-2.74732	-3.00513	-3.03754	-3.01473	-3.02298	-2.82726	-2.89486	-3.08192	-3.01489	-2.88999	-2.95011	-3.00478
ENSG00000264522	56957	OTUD7B	-3.05425	Down	-3.28141	-1.74013	-2.96607	-3.24597	-3.01166	-3.10787	-2.48199	-3.873	-2.89249	-3.79478	-3.39889	-2.85669
ENSG00000266074	57597	BAHCC1	9.71623	Up	9.77578	8.12541	9.84533	10.2992	9.69818	10.4334	8.8564	10.9427	9.4258	11.4347	8.12056	9.63738
ENSG00000266714	80022	MYO15B	3.06318	Up	3.70348	3.13674	4.06375	2.95603	2.62317	3.15099	1.901	2.96359	2.36124	3.90827	2.89457	3.09534
ENSG00000267060	100885848	PTGES3L	3.27585	Up	2.71726	3.51812	3.465	2.21534	3.9536	3.29351	3.80815	3.89783	3.71294	2.75703	3.75761	2.21376
ENSG00000267206	158062	LCN6	6.97573	Up	8.43734	6.9493	8.55172	6.18086	4.27844	5.23148	7.58606	7.23307	7.74612	7.63566	5.76295	8.11575
ENSG00000267365	400617	KCNJ2-AS1	4.40472	Up	3.49823	2.6401	3.48436	5.14918	5.40917	7.10211	5.41589	2.50937	2.93175	6.16621	4.11871	4.43152
ENSG00000267454	386758	ZNF582-DT	-2.63225	Down	-2.54696	-2.50437	-2.52027	-2.68647	-2.72398	-2.39132	-1.6092	-3.60047	-2.43993	-2.35109	-3.947	-2.26601
ENSG00000267508	26974	ZNF285	-3.41143	Down	-3.83095	-3.1503	-3.25869	-2.85618	-3.5712	-2.31583	-3.34875	-4.22025	-2.94244	-2.34692	-4.86517	-4.23045
ENSG00000270882	554313	H4C15	5.25456	Up	6.43931	4.33319	5.75209	5.29926	4.9507	5.50537	3.94433	4.4864	5.45493	7.31715	5.33386	4.23814
ENSG00000270903	100421415	HNRNPA3P9	-2.01532	Down	-2.38413	-1.96186	-2.02271	-2.22395	-1.95631	-2.19812	-1.52098	-1.94	-1.98489	-2.38413	-2.02949	-1.57729
ENSG00000271858	11068	CYB561D2	-2.48913	Down	-1.78195	-2.79134	-2.12473	-2.56561	-2.61423	-1.63585	-3.10159	-2.98357	-2.58777	-1.93081	-3.14514	-2.60695
ENSG00000272143	283481	FGF14-AS2	-2.98977	Down	-3.03789	-3.19809	-2.73428	-3.25567	-2.94033	-2.9526	-2.87243	-2.67441	-3.0684	-2.77621	-2.911	-3.45592
ENSG00000272323	101929704	TTC23L-AS1	-3.39729	Down	-3.77625	-1.83703	-2.45499	-3.48197	-3.4954	-3.32976	-3.57035	-4.61999	-3.44961	-2.39178	-4.46076	-3.89955
ENSG00000273045	150590	C2orf15	-3.34151	Down	-3.27746	-3.69509	-3.77563	-3.42127	-3.2003	-3.45076	-3.54375	-3.25592	-2.82352	-3.18544	-2.59791	-3.871
ENSG00000273148	100270804	LCDR	-3.35036	Down	-4.30736	-2.80095	-3.69286	-2.70986	-3.59259	-2.84745	-2.37626	-4.32265	-3.28111	-3.82259	-3.23658	-3.21402
ENSG00000273703	8342	H2BC14	3.16145	Up	3.69576	2.26267	2.99103	2.74013	4.10825	3.85017	2.3509	2.45098	3.34261	5.23682	2.45309	2.45499
ENSG00000273749	23191	CYFIP1	3.12947	Up	2.86965	3.29461	3.31814	2.94208	2.91607	2.37595	2.86338	2.60679	3.40124	5.01553	2.9725	2.97766
ENSG00000273983	8355	H3C8	4.14948	Up	5.04596	2.96516	4.61036	4.24875	4.24035	4.49257	3.24788	3.18137	4.33681	6.63779	3.84335	2.94347
ENSG00000274015	105370532	LOC105370532	-2.09152	Down	-2.41859	-1.83643	-1.93533	-1.50121	-2.703	-2.11541	-1.52286	-2.88017	-2.13346	-1.90051	-1.62826	-2.52295
ENSG00000274070	729438	CASTOR2	3.55799	Up	3.94324	2.86002	2.97932	3.86128	4.09981	4.06514	2.8189	4.30674	3.02937	4.2379	3.30697	3.18716
ENSG00000274641	8348	H2BC17	3.30272	Up	3.95492	2.44351	3.3266	3.37725	3.66297	3.65396	2.66715	2.74337	3.30952	4.88378	3.21513	2.3945
ENSG00000274997	85235	H2AC12	2.17401	Up	2.08714	1.58116	2.24502	2.24046	2.72506	2.01095	1.92307	1.69745	2.54388	3.03531	2.18485	1.81378
ENSG00000275160	100132678	RPL7AP45	-2.76769	Down	-3.4757	-2.74361	-3.0375	-2.5514	-2.9425	-2.84809	-2.65734	-2.10871	-2.19136	-3.54287	-1.6805	-3.43267
ENSG00000275291	124904624	LOC124904624	-3.58722	Down	-3.01916	-3.59807	-3.32689	-3.53475	-4.23557	-3.68803	-4.03147	-4.05802	-2.92978	-2.59295	-4.02328	-4.00864
ENSG00000275491	101929125	LINC01730	-2.82798	Down	-2.39804	-2.91066	-2.39453	-2.96966	-2.95161	-2.45783	-2.89358	-3.28675	-2.81263	-2.48929	-3.15849	-3.21274
ENSG00000275832	57636	ARHGAP23	7.37539	Up	7.12297	7.60901	7.43754	6.78835	7.58768	7.537	7.07288	7.77244	6.75278	8.42457	7.06434	7.33518
ENSG00000276043	29128	UHRF1	6.67696	Up	6.13827	6.2743	6.7182	5.99278	7.46109	6.98359	7.23569	6.63846	6.84809	7.32868	6.26306	6.2413
ENSG00000276180	8294	H4C9	2.50079	Up	3.62353	1.78797	2.744	2.12274	2.54236	2.69798	1.87166	2.0279	2.37371	4.27724	2.12926	1.81108
ENSG00000276368	8331	H2AC14	2.70343	Up	2.68398	2.31816	2.91018	2.30682	3.44052	2.67337	2.62911	1.84597	2.90857	3.85393	2.32346	2.5471
ENSG00000277586	4747	NEFL	-4.36944	Down	-4.06656	-4.93013	-4.25377	-4.60108	-3.96178	-4.58246	-4.49201	-4.6565	-4.29593	-4.32696	-4.10004	-4.1661
ENSG00000277775	8968	H3C7	5.14464	Up	6.6121	3.59555	5.3923	5.50049	5.04901	5.65621	4.16707	4.66256	5.25862	7.2272	4.9786	3.63594
ENSG00000278195	6753	SSTR3	-4.35221	Down	-3.94079	-4.42694	-4.64916	-4.4797	-4.45365	-3.54316	-4.23028	-4.15981	-4.27284	-4.41048	-4.25557	-5.40411
ENSG00000278530	101060146	CHMP1B2P	-2.07901	Down	-2.15179	-2.02873	-1.96994	-2.23346	-1.9674	-2.13985	-1.89749	-2.42639	-2.09778	-2.24587	-1.85035	-1.9391
ENSG00000278637	8359	H4C1	3.79183	Up	5.31241	2.73364	4.52135	4.20734	3.45834	4.48353	2.45477	2.61661	4.07858	5.31209	3.66342	2.65992
ENSG00000278677	8336	H2AC17	2.31504	Up	2.17815	1.88261	1.98115	2.20013	2.76716	2.31585	2.22852	2.2683	2.4582	3.30865	2.10205	2.08964
ENSG00000278828	8357	H3C10	3.18838	Up	4.28881	2.52443	3.99338	3.39182	3.152	3.84053	2.13896	2.49534	3.11434	4.23104	3.08468	2.00519
ENSG00000278873	100133319	PRO1804	-2.05606	Down	-2.27577	-2.02648	-2.31557	-2.28006	-2.00921	-1.80198	-1.88302	-2.23868	-2.182	-1.63304	-2.23265	-1.79424
ENSG00000279020	147276	C18orf15	4.07833	Up	3.2149	4.71478	4.22667	4.01142	3.5083	5.05888	3.95429	3.30857	3.76404	5.39567	3.73566	4.04673
ENSG00000280018	105379499	LOC105379499	3.20276	Up	2.93201	3.15328	3.3729	3.17928	1.85699	3.87605	4.59121	2.54019	3.30214	3.86692	2.11874	3.64343
ENSG00000283154	29970	SCHIP1	5.06297	Up	5.13836	5.10016	6.40622	3.80737	5.39356	4.3989	5.89793	3.49507	4.23998	4.35081	7.24766	5.27963
ENSG00000284948	254896	LOC254896	2.24549	Up	2.76017	2.05293	2.63372	2.12422	1.7322	1.73726	2.51426	1.83549	1.52707	2.24271	3.60088	2.18495
ENSG00000286330	105370259	LOC105370259	-5.76632	Down	-5.98779	-5.4872	-5.85747	-5.9763	-5.61015	-4.54881	-5.18087	-6.7231	-5.57339	-6.50586	-5.38177	-6.36314
ENSG00000286522	8358	H3C2	4.3538	Up	4.84251	3.8524	4.87916	4.59889	4.30238	4.80112	3.72308	3.18846	4.72716	6.02703	4.06403	3.23944
ENSG00000286753	101929200	LOC101929200	-2.22889	Down	-2.78133	-1.69209	-2.06519	-1.79639	-2.34509	-2.15078	-1.59668	-3.16607	-2.14035	-2.17284	-2.28358	-2.5563
ENSG00000287080	8352	H3C3	3.72786	Up	3.954	3.25119	3.94643	3.717	4.0273	3.92242	3.41063	2.91814	3.78424	5.65992	3.28364	2.85947
ENSG00000287420	105376478	LOC105376478	-2.27734	Down	-2.17846	-2.41787	-2.41095	-2.47709	-2.50027	-1.95792	-2.05778	-2.48424	-2.4564	-2.37847	-1.55948	-2.44908
ENSG00000287672	112267986	LOC112267986	-1.9917	Down	-2.17668	-1.95536	-2.41729	-1.88104	-2.33049	-2.10702	-1.94761	-1.87515	-1.65592	-1.88953	-2.11732	-1.54697
