# Supplementary material for: SNX10 regulates the proliferation, apoptosis and cell cycle of acute B lymphoblastic leukemia cells via the PI3K/Akt signaling pathway
Source: Oncol Rep. 2025 May 8;54(1):78. doi: 10.3892/or.2025.8911 (PMC12093086; doi:10.3892/or.2025.8911)
Supplement: Supporting Data [file Supplementary_Data4.xlsx]

## Sheet: All differentially expressed ge
Table SIV. All differentially expressed genes obtained from survival analysis.
	ENSEMBL	ENTREZID	SYMBOL	groupH_N	groupH_obs	groupH_exp	groupH_median	groupL_N	groupL_obs	groupL_exp	groupL_media	p.logrank	HR	HR.lower	HR.upper	p.cox
1	ENSG00000078070	56922	MCCC1	42	12	20.9003	NA	37	22	13.0997	25.7	0.0015774883246592	2.97562554375606	1.4647486664236	6.04496018984113	0.00256611645207921
2	ENSG00000013810	10460	TACC3	44	13	21.3920918035413	NA	35	21	12.6079081964587	25.6	0.00272362299320883	2.77743978156317	1.38437675620167	5.57230660342429	0.00403370906854371
3	ENSG00000066336	6688	SPI1	40	11	19.2060153663262	NA	39	23	14.7939846336738	25.7	0.00436723105544579	2.73738828738778	1.33065857057061	5.63126770582069	0.00621563373729406
4	ENSG00000064225	10402	ST3GAL6	42	11	19.2486033620713	NA	37	23	14.7513966379287	25.8	0.00426338333890963	2.73535653325893	1.33232029459424	5.61589836498064	0.00611161939993755
5	ENSG00000019991	3082	HGF	38	10	17.9286533988726	NA	41	24	16.0713466011274	25.8	0.00626661514298998	2.69619506139122	1.28631259319861	5.65140063737833	0.00861991047550648
6	ENSG00000068903	22933	SIRT2	40	11	18.7357427485447	NA	39	23	15.2642572514553	25.7	0.0073242367318479	2.58913419684366	1.25875746906078	5.32558181701765	0.00972764778914858
7	ENSG00000006534	221	ALDH3B1	38	10	17.5556248011588	NA	41	24	16.4443751988412	29.3	0.0093826375316105	2.57055379808996	1.22791438654274	5.38127649719881	0.0122573652693723
8	ENSG00000018189	22902	RUFY3	38	10	17.3204473785296	NA	41	24	16.6795526214704	34.4	0.0115515334888068	2.5219176788346	1.19985447211792	5.30070014873723	0.0146584997954256
9	ENSG00000035687	159	ADSS2	41	13	20.1334373403756	NA	38	21	13.8665626596244	25.7	0.0109476188184068	2.45730163042299	1.20411639787238	5.01474052969376	0.0134987231219572
10	ENSG00000005302	10943	MSL3	44	12	19.2762628494563	NA	35	22	14.7237371505437	29.3	0.0114893892433952	2.41748303896045	1.19274582226816	4.89980692830926	0.0143269924796345
11	ENSG00000088298	55741	EDEM2	41	12	19.1219096797169	NA	38	22	14.8780903202831	29.3	0.013481472604534	2.37140285356335	1.17060160560928	4.80398409411154	0.0165173017341882
12	ENSG00000088298	111089941	MMP24-AS1-EDEM2	41	12	19.1219096797169	NA	38	22	14.8780903202831	29.3	0.013481472604534	2.37140285356335	1.17060160560928	4.80398409411154	0.0165173017341882
13	ENSG00000077984	8530	CST7	37	11	17.4971308453374	NA	42	23	16.5028691546626	52.1	0.0255356074171315	2.22268044135714	1.08233807570313	4.56447800857618	0.0295945660453846
14	ENSG00000051523	1535	CYBA	43	13	19.6378406572597	NA	36	21	14.3621593427403	29.3	0.0207984772896773	2.21971654931482	1.10913940873856	4.44231042597775	0.0242850839238759
15	ENSG00000099385	9274	BCL7C	44	15	21.3512730793363	NA	35	19	12.6487269206637	54.3	0.0219319848858508	2.20763777757123	1.10326395268658	4.41749641605862	0.0252443912441418
16	ENSG00000028839	9519	TBPL1	38	12	18.283994286735	NA	41	22	15.716005713265	52.1	0.0289019687140184	2.17403109558978	1.06540300844284	4.43626605813632	0.0328379409869624
17	ENSG00000092036	54930	HAUS4	41	14	20.3484	NA	38	20	13.6516	52.1	0.0247598778072294	2.16880121255548	1.08594113923006	4.3314490349975	0.0282661839685658
18	ENSG00000096872	80173	IFT74	37	12	17.9823289508981	NA	42	22	16.0176710491019	52.1	0.035050395227106	2.16044740128511	1.03813863930439	4.49605938648723	0.0393926499761296
19	ENSG00000086504	10573	MRPL28	40	12	18.284205216967	NA	39	22	15.715794783033	52.1	0.0301123892010638	2.14384920549901	1.05852786833157	4.34196354524231	0.0341809132748366
20	ENSG00000087088	581	BAX	41	13	19.2639359157347	NA	38	21	14.7360640842653	25.8	0.0295194354817528	2.12455178564973	1.06096899987899	4.2543375823632	0.0334189254651302
21	ENSG00000089327	53827	FXYD5	40	13	19.2214457033313	NA	39	21	14.7785542966687	25.7	0.0306465650620193	2.11462446700842	1.05580116070736	4.23530187585205	0.034584697006536
22	ENSG00000005844	3683	ITGAL	46	14	20.2494334360402	NA	33	20	13.7505665639598	29.3	0.0286895713814549	2.10972596639967	1.0642376856598	4.18228344408001	0.0324936228949958
23	ENSG00000077420	54518	APBB1IP	43	15	21.0858062499702	NA	36	19	12.9141937500299	25.8	0.0298906284707969	2.10151681639423	1.05942329834225	4.16865754840235	0.0335744996593484
24	ENSG00000093000	10762	NUP50	45	15	21.0522663702034	NA	34	19	12.9477336297966	54.3	0.031774396539602	2.07428529963243	1.05040847521972	4.09617744503748	0.0355864195947272
25	ENSG00000055950	84545	MRPL43	43	15	20.8511447239879	NA	36	19	13.1488552760121	54.3	0.0364743894657491	2.06045946061164	1.03225255147595	4.11284349237368	0.0403666563951934
26	ENSG00000074660	8578	SCARF1	41	15	20.837375694638	NA	38	19	13.162624305362	25.7	0.0381843839100777	2.03118797888082	1.02554532731646	4.02295685588635	0.0421225632454224
27	ENSG00000093010	1312	COMT	40	14	19.8485491516799	NA	39	20	14.1514508483201	54.3	0.0405853542892269	2.02271191595335	1.01684111502711	4.02360155827354	0.0446901439284958
28	ENSG00000093144	55862	ECHDC1	45	17	22.4439327153034	NA	34	17	11.5560672846966	25.7	0.0441029828168723	2.01183718748346	1.0056192298357	4.02487218706295	0.0481772280877391
29	ENSG00000100060	4242	MFNG	44	15	20.7352089374076	NA	35	19	13.2647910625924	52.1	0.0423150813032921	2.00213787419998	1.01113118513072	3.96442729316849	0.0464014341750024
30	ENSG00000019505	57586	SYT13	23	14	8.8838690336648	25.7	56	20	25.1161309663352	NA	0.0454261500209092	0.503843715674628	0.254077510250544	0.999137977912672	0.0497121097378553
31	ENSG00000076554	7163	TPD52	36	19	13.2606092157047	24.7	43	15	20.7393907842953	NA	0.0423686359457125	0.500630044997215	0.253377139533681	0.989159647216701	0.0464441660317996
32	ENSG00000076554	124188259	TPD52-MRPS28	36	19	13.2606092157047	24.7	43	15	20.7393907842953	NA	0.0423686359457125	0.500630044997215	0.253377139533681	0.989159647216701	0.0464441660317996
33	ENSG00000005102	4222	MEOX1	29	17	11.3299552433279	52.1	50	17	22.6700447566721	NA	0.0387539252167435	0.498312120553814	0.254021693749407	0.977534500402952	0.042758979335119
34	ENSG00000020181	25960	ADGRA2	31	16	10.4529251578389	25.7	48	18	23.5470748421611	NA	0.0370655097182212	0.490278345927583	0.247548342481789	0.971013799065004	0.0409211638282396
35	ENSG00000079308	7145	TNS1	36	20	14.126134266606	52.1	43	14	19.873865733394	NA	0.0389026805667823	0.489699972123894	0.245339666806811	0.977445130741837	0.0429025425057968
36	ENSG00000080947	NA	NA	40	21	15.0081744162525	25.6	39	13	18.9918255837475	NA	0.0378274688716461	0.486738415252679	0.243158199182828	0.974321596717187	0.0420091397856607
37	ENSG00000083520	22894	DIS3	41	22	16.0533704569419	29.3	38	12	17.9466295430581	NA	0.0406563018581727	0.486510561160584	0.240461930600449	0.984324319154178	0.0450799291703152
38	ENSG00000065559	6416	MAP2K4	40	22	16.0265332127122	29.3	39	12	17.9734667872878	NA	0.0395238329794106	0.484271198020924	0.239210287927955	0.980386735303178	0.0439037190110224
39	ENSG00000092140	55632	G2E3	44	23	17.1323942281938	25.8	35	11	16.8676057718062	NA	0.0431828779123998	0.482619312275326	0.234562519726851	0.993003489442159	0.0478118703281984
40	ENSG00000083817	55659	ZNF416	44	23	17.1328612170323	52.1	35	11	16.8671387829677	NA	0.0427776114744668	0.481181908993149	0.233519010955958	0.991508265620221	0.0473581695906777
41	ENSG00000099250	8829	NRP1	22	12	7.24049506385374	25.8	57	22	26.7595049361463	NA	0.0428070666924123	0.481041184134411	0.233381426356965	0.991512582837254	0.0473605470979381
42	ENSG00000091622	83394	PITPNM3	32	18	11.9681615545673	54.3	47	16	22.0318384454327	NA	0.0293725252129164	0.478377207768519	0.24284171608069	0.942361784481728	0.0330412235325633
43	ENSG00000062524	4058	LTK	38	22	15.9051157527814	52.1	41	12	18.0948842472186	NA	0.0354324547148099	0.476504641976114	0.235147758670439	0.965591486427927	0.0396734210910479
44	ENSG00000041353	5874	RAB27B	26	15	9.34771622739434	25.7	53	19	24.6522837726057	NA	0.0291334349294025	0.4762685261248	0.240964660788995	0.941348446010175	0.0328562694147123
45	ENSG00000055208	23118	TAB2	35	18	12.0076372410376	25.7	44	16	21.9923627589624	NA	0.0295108049132847	0.475594672333567	0.240080395930433	0.942143949219471	0.0331024612078666
46	ENSG00000085788	23259	DDHD2	34	19	12.8371364962293	25.6	45	15	21.1628635037707	NA	0.0283795307110298	0.474845247782131	0.240346882232117	0.938135777952454	0.032050156775578
47	ENSG00000015153	10138	YAF2	36	19	12.8351252097158	29.3	43	15	21.1648747902842	NA	0.0282774336286969	0.474480639261897	0.240096579777797	0.937672153608904	0.0319422201368554
48	ENSG00000037474	54888	NSUN2	33	19	12.7989071816701	29.3	46	15	21.2010928183299	NA	0.0277127600183266	0.474324967090477	0.240467443318937	0.935611787193081	0.0313981526888646
49	ENSG00000099203	11018	TMED1	42	24	18.1379972683116	34.4	37	10	15.8620027316884	NA	0.0431680424146115	0.474147749049801	0.22624590562255	0.993680249418781	0.0480689980184219
50	ENSG00000069011	5307	PITX1	17	10	5.64435187052285	25.6	62	24	28.3556481294772	NA	0.0437787581588162	0.473832705627825	0.225459326345314	0.995822335505045	0.0487225492248393
51	ENSG00000072364	27125	AFF4	35	18	12.1927993186294	25.7	44	16	21.8072006813706	NA	0.032898204115248	0.473103159149956	0.234429681960945	0.954770732636823	0.0366934432888016
52	ENSG00000093100	NA	NA	30	17	11.0304439285482	25.6	49	17	22.9695560714518	NA	0.0272781799889851	0.472505740375565	0.239272156892608	0.933086730973328	0.0308150952812925
53	ENSG00000029364	55334	SLC39A9	40	22	15.7749307653951	52.1	39	12	18.2250692346049	NA	0.0321291515977806	0.47145991843555	0.233187953095595	0.953198704051984	0.0363125428656167
54	ENSG00000039123	23517	MTREX	38	20	13.7441504230048	25.7	41	14	20.2558495769952	NA	0.0280196473424121	0.471326426554643	0.237236238646707	0.936402472219238	0.0317480985782492
55	ENSG00000083307	79977	GRHL2	21	13	7.70754839621181	52.1	58	21	26.2924516037882	NA	0.0296183284681399	0.470433871289906	0.234671196380647	0.943055776209691	0.0335704438819545
56	ENSG00000082684	54437	SEMA5B	17	11	6.23843417115241	25.8	62	23	27.7615658288476	NA	0.0346849964199432	0.468895100863587	0.228310541342952	0.962998091636999	0.0391461710904048
57	ENSG00000067177	5255	PHKA1	22	13	7.66785198839311	19.1	57	21	26.3321480116069	83.7	0.0281165633881061	0.467456120096234	0.233305578440977	0.93660522682575	0.0319790014520009
58	ENSG00000068305	4205	MEF2A	37	19	12.7896696778432	29.3	42	15	21.2103303221568	NA	0.0261562426440771	0.467172335718129	0.235282341583168	0.927608888077921	0.029653515559765
59	ENSG00000093183	9117	SEC22C	35	19	12.8167891988105	25.8	44	15	21.1832108011895	NA	0.0265111052672832	0.465651790277797	0.233416529436232	0.928947021501126	0.0300724365969549
60	ENSG00000088992	54997	TESC	37	21	14.6177531877434	29.3	42	13	19.3822468122566	NA	0.0265692814124062	0.464588513535814	0.232125165638684	0.92985388428495	0.0303574061683531
61	ENSG00000092054	4625	MYH7	19	11	6.2795099565288	24.7	60	23	27.7204900434712	NA	0.0350003314290483	0.463895254172345	0.22335753266637	0.963472349800118	0.0394223059610342
62	ENSG00000074696	51495	HACD3	39	22	15.6844029120803	25.8	40	12	18.3155970879197	NA	0.029070409055533	0.463862402826023	0.228864810433718	0.940154706823515	0.0330749744918301
63	ENSG00000007174	1770	DNAH9	30	16	10.0153893247894	25.6	49	18	23.9846106752106	NA	0.0232805878094494	0.463550215174025	0.234869656746753	0.914885323903617	0.0266636276713341
64	ENSG00000092439	54822	TRPM7	43	23	16.7446392799112	29.3	36	11	17.2553607200888	NA	0.0314549983091332	0.462402458335236	0.225065746836287	0.950015879715359	0.0357693859892796
65	ENSG00000085511	4216	MAP3K4	44	24	17.8799181491197	34.4	35	10	16.1200818508803	NA	0.03486216612854	0.459559049094764	0.219226697637821	0.963361314477276	0.039512819808761
66	ENSG00000088305	1789	DNMT3B	33	20	13.4678387365508	25.8	46	14	20.5321612634492	NA	0.0218621445615645	0.458419288530495	0.231388963186645	0.908203404357248	0.0253520166436168
67	ENSG00000056998	8908	GYG2	28	17	10.7281478853521	25.8	51	17	23.2718521146479	NA	0.0200371244674206	0.457620312595263	0.232942580535212	0.899004166686179	0.0232686160019257
68	ENSG00000027644	3645	INSRR	19	12	6.84497522542607	19.7	60	22	27.1550247745739	NA	0.0265310921470376	0.456641530204733	0.224546692477353	0.928633082087149	0.0304328997240569
69	ENSG00000036530	10858	CYP46A1	17	9	4.90459621399611	24.7	62	25	29.0954037860039	83.7	0.0423543055190579	0.453249579258979	0.207150876533624	0.991717653027146	0.0476156851993443
70	ENSG00000099814	283638	CEP170B	30	17	10.6534194628426	29.3	49	17	23.3465805371574	NA	0.0184641556254626	0.452995090774514	0.230504748324672	0.890240022200213	0.0216045267039245
71	ENSG00000064205	8839	CCN5	23	15	8.93428689779156	25.6	56	19	25.0657131022084	NA	0.0178695646956254	0.44974802543328	0.228123232312487	0.886684290463045	0.0210425841641309
72	ENSG00000027869	9047	SH2D2A	40	22	15.4263876217869	29.3	39	12	18.5736123782131	NA	0.0228116917272754	0.44910352098253	0.221435996964573	0.910845460194869	0.0265005895999055
73	ENSG00000088179	5775	PTPN4	35	21	14.3218084377622	25.8	44	13	19.6781915622378	NA	0.0201000994215744	0.449033722119013	0.224537237480614	0.897985945950116	0.0235581722924635
74	ENSG00000099954	27443	CECR2	24	16	9.70654127208843	29.3	55	18	24.2934587279116	NA	0.0165784946360334	0.447209144154089	0.227485237756748	0.879160426352106	0.0196272466103907
75	ENSG00000079335	8556	CDC14A	36	18	11.5993874787904	25.7	43	16	22.4006125212096	NA	0.0185464232886491	0.446919684465248	0.224883982888173	0.888178881382759	0.0215406267820607
76	ENSG00000049759	23327	NEDD4L	33	20	13.2675996196333	34.4	46	14	20.7324003803667	NA	0.0176977475701285	0.446353921308838	0.225107530132289	0.885051792584165	0.0209109791458163
77	ENSG00000068137	79990	PLEKHH3	31	17	10.6823532748187	25.8	48	17	23.3176467251813	NA	0.0178892046254113	0.446246723618014	0.225052242413757	0.884844053114129	0.0208739154345189
78	ENSG00000097096	84144	SYDE2	16	10	5.37962690426523	25.8	63	24	28.6203730957348	NA	0.0290787461076732	0.446067639910132	0.21188191947311	0.939090696694614	0.0335517932833044
79	ENSG00000011405	5286	PIK3C2A	34	19	12.297319365927	34.4	45	15	21.702680634073	NA	0.0163465361064565	0.444462402784752	0.225221718543589	0.877121570542327	0.0193880976774415
80	ENSG00000100124	129138	ANKRD54	38	21	14.2712043984397	25.7	41	13	19.7287956015603	NA	0.0186549997803982	0.443249731742593	0.220981579267457	0.889080100437195	0.0219625828383182
81	ENSG00000071575	28951	TRIB2	31	19	12.2392173101817	25.7	48	15	21.7607826898183	NA	0.0153748919032874	0.441555503247532	0.223855190473697	0.870970478886844	0.0183463198032492
82	ENSG00000069018	57113	TRPC7	16	9	4.75672319483082	24.7	63	25	29.2432768051692	NA	0.0340199021897135	0.441492974158241	0.203124418391843	0.95958943673173	0.0390079030961788
83	ENSG00000063438	57491	AHRR	29	19	12.2055614156028	25.7	50	15	21.7944385843972	NA	0.0148431182849462	0.439819284343438	0.222995702993572	0.867465158671466	0.0177763020504029
84	ENSG00000011454	23637	RABGAP1	41	23	16.2872048444178	29.3	38	11	17.7127951555822	NA	0.0207122110899399	0.437049203795502	0.212509821341191	0.898838488182654	0.0244576401501933
85	ENSG00000075223	10512	SEMA3C	16	9	4.68429659606502	17	63	25	29.315703403935	83.7	0.0303346855269819	0.435779790019592	0.201246770796238	0.943637627764957	0.0351060574842346
86	ENSG00000067842	492	ATP2B3	20	13	7.25115939676893	17.65	59	21	26.7488406032311	NA	0.0157706311826422	0.43528154464882	0.217337167958678	0.871779203214272	0.018915656481764
87	ENSG00000044090	9820	CUL7	38	22	15.1314910364536	25.7	41	12	18.8685089635464	NA	0.0174143258004914	0.43508302209321	0.214860621188808	0.881023405156297	0.0207860656596212
88	ENSG00000092345	1618	DAZL	24	13	7.3737176564524	25.7	55	21	26.6262823435476	NA	0.0176729519754623	0.434562340992623	0.214158769207105	0.881796383627723	0.0209776047322002
89	ENSG00000072786	6793	STK10	40	22	15.1528886819258	29.3	39	12	18.8471113180742	NA	0.0173934346217465	0.433556865683494	0.21355394952632	0.880206412469687	0.0207154576403957
90	ENSG00000057593	2155	F7	19	12	6.61890624681858	29.3	60	22	27.3810937531814	NA	0.0185483856538637	0.432727343159198	0.211204024606743	0.886597468330816	0.0220876561592981
91	ENSG00000013588	9052	GPRC5A	16	10	5.26525992602817	16.2	63	24	28.7347400739718	NA	0.0237617850751674	0.432212699799467	0.204521931400436	0.913387706583852	0.0280011550570957
92	ENSG00000006282	64847	SPATA20	45	24	17.3710954225321	34.4	34	10	16.6289045774679	NA	0.0222939795139846	0.431913529566519	0.205912264789195	0.905964961405238	0.0263339104009951
93	ENSG00000077274	827	CAPN6	20	12	6.58538792549151	24.7	59	22	27.4146120745085	NA	0.0177118690599514	0.431395528411986	0.211120211785744	0.881498272286327	0.0211154721492709
94	ENSG00000086848	79796	ALG9	38	21	14.142552826392	29.3	41	13	19.857447173608	NA	0.0157417811129942	0.431257217118426	0.213855821710639	0.86966436465955	0.0187638768162889
95	ENSG00000075213	10371	SEMA3A	18	11	5.9366254914628	24.7	61	23	28.0633745085372	NA	0.0207278262609323	0.431191901063854	0.207128254621152	0.897639271296565	0.0245363629056147
96	ENSG00000034677	25897	RNF19A	32	17	10.499015642896	25.7	47	17	23.500984357104	NA	0.0139577909318156	0.430099191225376	0.215553740811883	0.858186518109014	0.0166716523859521
97	ENSG00000070159	5774	PTPN3	19	12	6.45720041476191	19.7	60	22	27.5427995852381	NA	0.0151618171760495	0.427947344877018	0.211347279127649	0.866530814795479	0.0183760549214029
98	ENSG00000054598	2296	FOXC1	22	15	8.5833146588592	24.2	57	19	25.4166853411408	NA	0.0112204548879606	0.426878315322561	0.216723056142065	0.840820073952708	0.0138452308807634
99	ENSG00000066230	6550	SLC9A3	34	20	12.8841321512169	25.8	45	14	21.1158678487831	NA	0.0115563042936752	0.424122177015283	0.213630308043033	0.84201358264179	0.0142290545983796
100	ENSG00000073282	8626	TP63	17	10	5.20950746100537	29.3	62	24	28.7904925389946	NA	0.0212121351294032	0.423474762259284	0.199434159142071	0.899198387287343	0.0253177360469569
101	ENSG00000010310	2696	GIPR	20	12	6.4803523358818	19.1	59	22	27.5196476641182	NA	0.0150815574917444	0.423474216886161	0.207450167061914	0.864450556522454	0.0182732540100567
102	ENSG00000080493	8671	SLC4A4	20	13	7.09350872299978	25.7	59	21	26.9064912770002	NA	0.0122867658931686	0.421860500236413	0.210276684624564	0.846343387891361	0.0151156922980409
103	ENSG00000047617	57101	ANO2	16	11	5.7053053541516	20.9	63	23	28.2946946458484	NA	0.0150096399148183	0.420730844644513	0.204881248888372	0.863985575037812	0.0183645271461521
104	ENSG00000083642	23047	PDS5B	43	23	15.9997773020957	25.8	36	11	18.0002226979043	NA	0.0154800342277061	0.420270208161117	0.203933684481244	0.866100410616735	0.0187931388299707
105	ENSG00000076356	5362	PLXNA2	20	13	7.03908876404037	25.6	59	21	26.9609112359596	NA	0.0113190736614875	0.418137764844393	0.208495887544424	0.838573808089198	0.014056643827019
106	ENSG00000073067	54905	CYP2W1	35	20	12.778713268733	25.7	44	14	21.221286731267	NA	0.00979242987620343	0.413007256497797	0.206815970834161	0.824767029508644	0.012213684170908
107	ENSG00000003137	56603	CYP26B1	21	13	6.98582094378873	16.2	58	21	27.0141790562113	NA	0.0102122509732698	0.412118756054068	0.205074577277663	0.828195631785176	0.0127984025145717
108	ENSG00000091664	57084	SLC17A6	22	14	7.63989311742499	24.7	57	20	26.360106882575	NA	0.00873390407383989	0.410691985508838	0.206626939038841	0.816291949857933	0.0111131253029634
109	ENSG00000075043	3785	KCNQ2	14	9	4.38576180319078	14.1	65	25	29.6142381968092	83.7	0.0177202092942366	0.406895406032571	0.188790077694901	0.87697337419382	0.0217316014077832
110	ENSG00000082512	7188	TRAF5	40	23	15.7127674207662	25.7	39	11	18.2872325792338	NA	0.0116939307459114	0.406757571511876	0.19753229388283	0.837593280217665	0.0146528136282222
111	ENSG00000009709	5081	PAX7	19	13	6.86673668143418	24.7	60	21	27.1332633185658	NA	0.00862705442201372	0.406449021150297	0.202962819893628	0.813946154673138	0.0110541329060135
112	ENSG00000002587	9957	HS3ST1	15	10	4.96979099013446	17	64	24	29.0302090098655	NA	0.0140994315832516	0.405718056191089	0.192747415557565	0.854004400750653	0.0175223111291385
113	ENSG00000065150	3843	IPO5	39	23	15.6734672158033	25.7	40	11	18.3265327841967	NA	0.0112186435002913	0.405112865208032	0.196846290520897	0.833728860842511	0.0141360376811045
114	ENSG00000096696	1832	DSP	19	12	6.18871690749028	25.7	60	22	27.8112830925097	NA	0.00930698995276724	0.400941039397671	0.196666993138807	0.817390424837713	0.0119103255648472
115	ENSG00000086300	29887	SNX10	40	23	15.5266253855523	25.8	39	11	18.4733746144477	NA	0.00993880136753511	0.400631841380193	0.195071733305598	0.822804358211332	0.0127338536069099
116	ENSG00000018625	477	ATP1A2	18	10	4.91740956260719	24.7	61	24	29.0825904373928	NA	0.0126392826394695	0.399806282466342	0.189778473767371	0.842271835822085	0.0158880493825735
117	ENSG00000091129	4897	NRCAM	20	11	5.57207825056143	20.45	59	23	28.4279217494386	NA	0.0109542037291962	0.398390374719731	0.191455888585807	0.828989339746501	0.0138318308452013
118	ENSG00000070087	5217	PFN2	38	22	14.3670826757535	29.3	41	12	19.6329173242465	NA	0.00795443579006905	0.398070111818753	0.196820027110155	0.805100051300716	0.0103705588270606
119	ENSG00000092009	1215	CMA1	27	17	9.70888715481825	25.7	52	17	24.2911128451818	NA	0.00549589303583431	0.397226161503951	0.202310972561118	0.779931119828386	0.00731864301362781
120	ENSG00000088726	55287	TMEM40	17	12	6.09487182895945	24.7	62	22	27.9051281710406	NA	0.00794598602182084	0.39513572664131	0.194303875548898	0.803546723024905	0.0103500923706364
121	ENSG00000049540	2006	ELN	19	14	7.39492719441444	25.6	60	20	26.6050728055856	NA	0.00590717439844723	0.394633144643844	0.19878844048119	0.783422408639629	0.00786942674554915
122	ENSG00000086696	3294	HSD17B2	17	11	5.46347825286617	15.6	62	23	28.5365217471338	NA	0.00921836663777575	0.393373622563207	0.190134275865421	0.813860658338264	0.0118958704846906
123	ENSG00000069482	51083	GAL	22	13	6.75367683523037	16.2	57	21	27.2463231647696	NA	0.00678976169660761	0.392772013696983	0.194983859385221	0.791192949149697	0.00891081895313727
124	ENSG00000100053	1417	CRYBB3	24	16	8.91814930319326	34.4	55	18	25.0818506968067	NA	0.00536532722795247	0.391525978810939	0.197654527727441	0.7755582118273	0.0071713676730785
125	ENSG00000095713	55118	CRTAC1	14	9	4.26504947252803	22.7	65	25	29.734950527472	NA	0.0136069697516936	0.391372973031708	0.180806455582128	0.84716446393753	0.017269219866386
126	ENSG00000065526	23013	SPEN	46	24	16.5685630399089	29.3	33	10	17.4314369600911	NA	0.0100503483734207	0.389301596866802	0.185030033608173	0.819087206372036	0.0129258730163409
127	ENSG00000055732	55283	MCOLN3	13	8	3.70760925466697	24.7	66	26	30.292390745333	83.7	0.017013394527386	0.386207665236527	0.171766010533085	0.868369476734857	0.0213704570100867
128	ENSG00000004948	799	CALCR	17	11	5.29339568887641	22.7	62	23	28.7066043111236	NA	0.0066797273319924	0.380633227016323	0.1844008269955	0.785688740497868	0.00899466214953562
129	ENSG00000066629	2009	EML1	23	14	7.22066096150675	24.7	56	20	26.7793390384932	NA	0.00403306214964383	0.373805669673303	0.18630584908135	0.750006934129551	0.00561149633981392
130	ENSG00000065609	9892	SNAP91	21	13	6.48289061066113	24.7	58	21	27.5171093893389	NA	0.00414897661425828	0.373269032457635	0.18532782087663	0.751801698918202	0.005805961601174
131	ENSG00000050730	79931	TNIP3	13	10	4.76250982525021	25.7	66	24	29.2374901747498	NA	0.00855865477297812	0.372187059256844	0.172923531234998	0.801066263734853	0.0115006058887263
132	ENSG00000094661	126370	OR1I1	21	14	7.18637505864457	24.7	58	20	26.8136249413554	NA	0.00380579417524174	0.370696242402481	0.184253271111454	0.745797907968739	0.00539782578952525
133	ENSG00000060237	65125	WNK1	41	24	16.1699617854294	29.3	38	10	17.8300382145706	NA	0.00651096664544704	0.368301519577422	0.174402323869313	0.7777763868828	0.00882167062685653
134	ENSG00000006128	6863	TAC1	15	12	5.46471663784476	24.7	64	22	28.5352833621552	NA	0.00223987506806334	0.349477022085412	0.172618464014066	0.707538383354722	0.0034858425471747
135	ENSG00000088808	23368	PPP1R13B	33	22	13.3052303213969	29.3	46	12	20.6947696786031	NA	0.00215708519016011	0.34732417063616	0.171321100538118	0.704140232167466	0.00335935392789541
136	ENSG00000089558	23415	KCNH4	31	18	9.8020342784681	22.7	48	16	24.1979657215319	NA	0.00157232103160365	0.343940687733727	0.172532988400024	0.685638136658697	0.00242794883631518
137	ENSG00000078399	3205	HOXA9	21	13	6.1749236971049	24.7	58	21	27.8250763028951	NA	0.00203075006807207	0.341880587951352	0.167759794743759	0.696724364717368	0.00312855830910754
138	ENSG00000088881	57593	EBF4	21	15	7.14548797144103	19.1	58	19	26.854512028559	NA	0.000905813844211734	0.333562254278776	0.168856137179202	0.658926464493607	0.00157274724740086
139	ENSG00000091128	22798	LAMB4	22	17	8.45381085179421	25.65	57	17	25.5461891482058	NA	0.000673098520850179	0.328254769727334	0.167098674146593	0.644835719966376	0.00122248710475193
140	ENSG00000058404	816	CAMK2B	14	10	4.15289188566136	14.8	65	24	29.8471081143386	NA	0.00207617719253428	0.328006374462639	0.155598012857668	0.691449586740806	0.00339332492215203
141	ENSG00000052795	57600	FNIP2	43	25	16.3469391466416	29.3	36	9	17.6530608533584	NA	0.00275192876297126	0.327478097945051	0.152012280244513	0.705481849632206	0.00435915157295128
142	ENSG00000083844	9422	ZNF264	44	25	16.3894206009309	25.8	35	9	17.6105793990691	NA	0.00278399369916515	0.326140164274706	0.150925930317337	0.704765619330518	0.00437254456046155
143	ENSG00000091137	5172	SLC26A4	25	18	9.00489562290769	25.6	54	16	24.9951043770923	NA	0.000452468103289139	0.317439905549817	0.161436291788215	0.624197276332833	0.000880899250483104
144	ENSG00000069535	4129	MAOB	15	11	4.61184580189369	17	64	23	29.3881541981063	NA	0.0011862223675646	0.312308266930599	0.148696297136415	0.655944064993854	0.00211430902689349
145	ENSG00000075673	479	ATP12A	23	15	6.87132402665584	19.1	56	19	27.1286759733442	NA	0.000436728004140408	0.307335743832061	0.15363823262552	0.61479006769775	0.000852530588701706
146	ENSG00000005073	3207	HOXA11	13	9	3.53092982269387	19.1	66	25	30.4690701773061	NA	0.00185494165276301	0.307197979746208	0.140112316328682	0.67353535529862	0.00321222274786748
147	ENSG00000037965	3224	HOXC8	12	10	3.88144750635806	18.05	67	24	30.1185524936419	NA	0.0009201020627988	0.304213607267495	0.1443788918852	0.640993414191649	0.00175084625437343
148	ENSG00000081277	5317	PKP1	6	4	1.33464575979711	13.4	73	30	32.6653542402029	83.7	0.0176061961216312	0.295123529134964	0.101182714464993	0.860798189785768	0.0254558608550388
149	ENSG00000066468	2263	FGFR2	17	13	5.29882121351679	19.1	62	21	28.7011787864832	NA	0.000227638073972636	0.284424206536691	0.139780452122854	0.578744223784061	0.000522717131453208
150	ENSG00000043355	7546	ZIC2	7	6	1.84888053165564	10	72	28	32.1511194683444	NA	0.0016485683927262	0.265185766363847	0.109111758820361	0.644508817768763	0.00339578030947813
151	ENSG00000066382	744	MPPED2	10	10	2.44639738918688	13.95	69	24	31.5536026108131	NA	3.85358001064873e-07	0.16823788710208	0.0772284417338919	0.366496928089006	7.2335405456302e-06
152	ENSG00000055813	114800	CCDC85A	4	4	0.644793481264769	9.15	75	30	33.3552065187352	83.7	2.06952066140742e-05	0.129599257016114	0.0426324829842208	0.393971128196901	0.000315781863612325
