# Supplementary material for: SNX10 regulates the proliferation, apoptosis and cell cycle of acute B lymphoblastic leukemia cells via the PI3K/Akt signaling pathway
Source: Oncol Rep. 2025 May 8;54(1):78. doi: 10.3892/or.2025.8911 (PMC12093086; doi:10.3892/or.2025.8911)
Supplement: Supporting Data [file Supplementary_Data5.xlsx]

## Sheet: Common genes between DEG and su
Table SV. Common genes between differentially expressed genes and survival analysis.
	ENSEMBL	ENTREZID	SYMBOL	avg_logfc	Sig	groupH_N	groupH_obs	groupH_exp	groupH_median	groupL_N	groupL_obs	groupL_exp	groupL_media	p.logrank	HR	HR.lower	HR.upper	p.cox
1	ENSG00000010310	2696	GIPR	-2.572	Down	20	12	6.4803523358818	19.1	59	22	27.5196476641182	NA	0.0150815574917444	0.423474216886161	0.207450167061914	0.864450556522454	0.0182732540100567
2	ENSG00000019991	3082	HGF	4.53211093929302	Up	38	10	17.9286533988726	NA	41	24	16.0713466011274	25.8	0.00626661514298998	2.69619506139122	1.28631259319861	5.65140063737833	0.00861991047550648
3	ENSG00000066336	6688	SPI1	2.48845536040527	Up	40	11	19.2060153663262	NA	39	23	14.7939846336738	25.7	0.00436723105544579	2.73738828738778	1.33065857057061	5.63126770582069	0.00621563373729406
4	ENSG00000074660	8578	SCARF1	6.51414283916554	Up	41	15	20.837375694638	NA	38	19	13.162624305362	25.7	0.0381843839100777	2.03118797888082	1.02554532731646	4.02295685588635	0.0421225632454224
5	ENSG00000079308	7145	TNS1	7.51074026399092	Up	36	20	14.126134266606	52.1	43	14	19.873865733394	NA	0.0389026805667823	0.489699972123894	0.245339666806811	0.977445130741837	0.0429025425057968
6	ENSG00000086300	29887	SNX10	-4.00617	Down	40	23	15.5266253855523	25.8	39	11	18.4733746144477	NA	0.00993880136753511	0.400631841380193	0.195071733305598	0.822804358211332	0.0127338536069099
7	ENSG00000088305	1789	DNMT3B	3.89558375934865	Up	33	20	13.4678387365508	25.8	46	14	20.5321612634492	NA	0.0218621445615645	0.458419288530495	0.231388963186645	0.908203404357248	0.0253520166436168
8	ENSG00000097096	84144	SYDE2	-4.21004	Down	16	10	5.37962690426523	25.8	63	24	28.6203730957348	NA	0.0290787461076732	0.446067639910132	0.21188191947311	0.939090696694614	0.0335517932833044
9	ENSG00000099250	8829	NRP1	5.53331910315536	Up	22	12	7.24049506385374	25.8	57	22	26.7595049361463	NA	0.0428070666924123	0.481041184134411	0.233381426356965	0.991512582837254	0.0473605470979381
